# Supplementary material
Source: PubMed Central journal article supplement (PMC8914997)
Supplement: mmc1.pdf [file mmc1.pdf]

**HGGA, Volume 3**

**Supplemental information**

**A year of COVID-19 GWAS results from the GRASP  
portal reveals potential genetic risk factors**

**Florian Thibord, Melissa V. Chan, Ming-Huei Chen, and Andrew D. Johnson**

## Supplemental Figures

Figure S1: Quantile-Quantile Plots of the 4 GWAS including ALL ancestries and Population as controls for Covid-19 Susceptibility, Hospitalization, Severity and Death

Figures S2-S47: Evolution of genome wide significant signals associated with Covid-19 phenotypes (analysis described as ancestry:controls(:sex))

Figure S48: Comparison of genome-wide significant signals in analyses using Population and Tested controls

Figure S49: Regional association plots of Covid-19 susceptibility and severity in Europeans (Population as controls), at the chr3p21.31 locus

Figure S50: Haplotype analysis of ABO blood groups, including the variant associated with Covid-19 susceptibility (from the LDlink tool LDhap)

Figure S51: Evolution of the signals from Figure 1 (Susceptibility signals in EUR, from UKB) in Covid-19hgi C2 analyses

Figure S1: Quantile-Quantile Plots of the 4 GWAS including ALL ancestries and Population as controls for Covid-19 Susceptibility, Hospitalization, Severity and Death

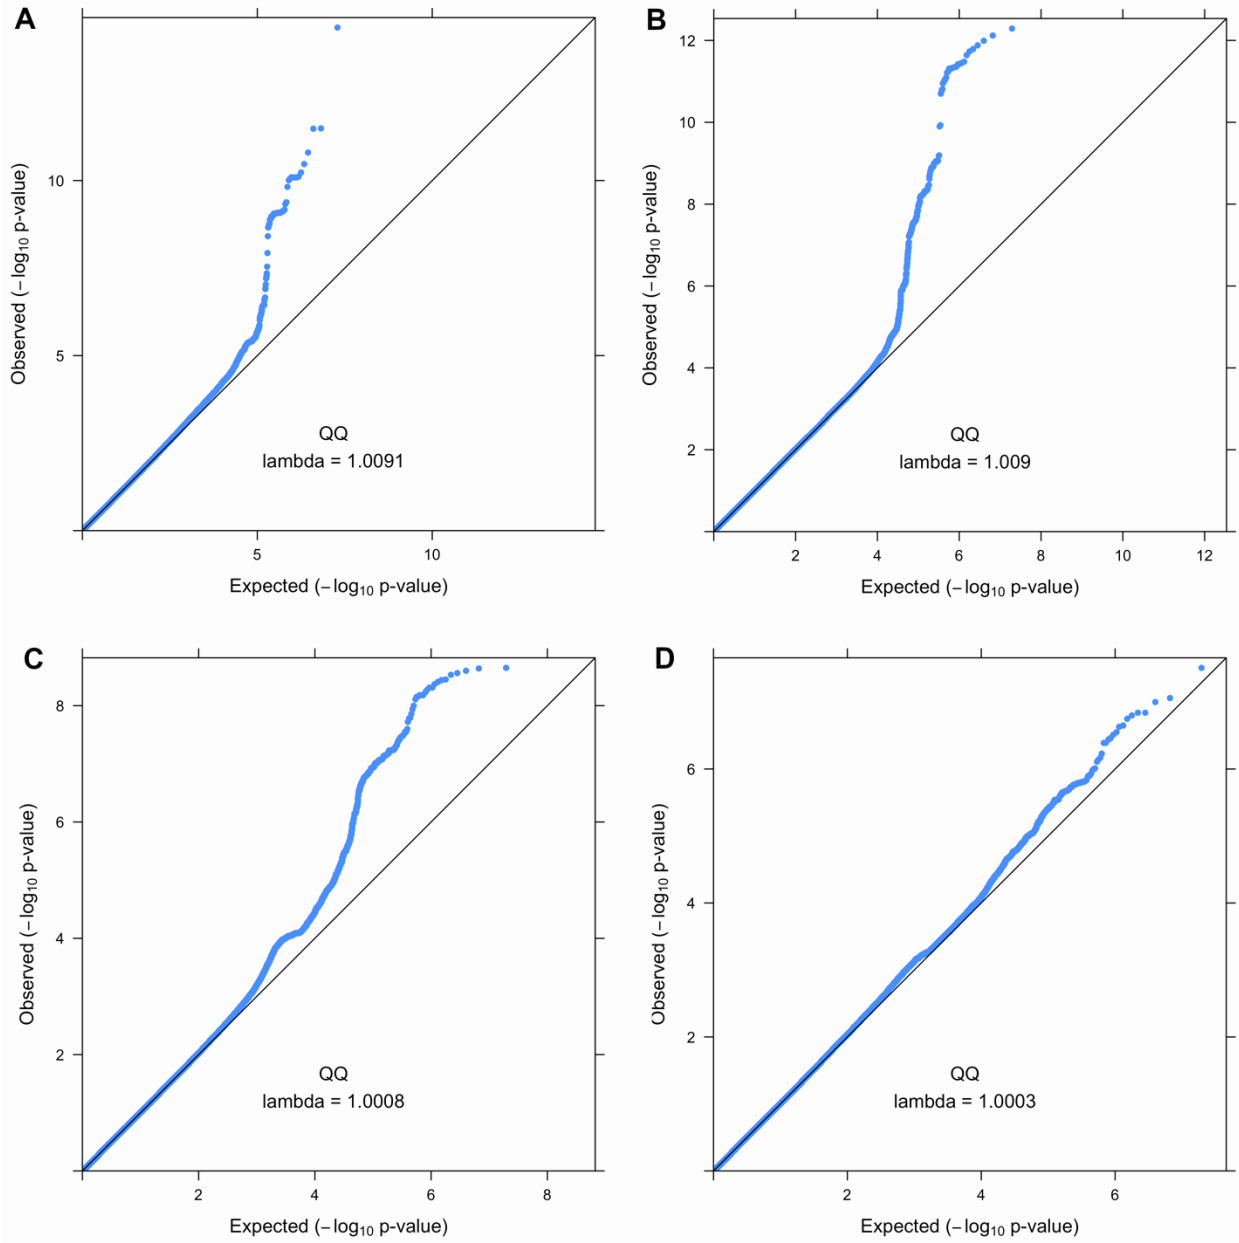

QQ-plots of ALL:Population GWAS for Covid-19 susceptibility (A), Hospitalization (B), Severity (C) and Death (D).

Figure S2: Covid-19 Susceptibility in ALL:Pop

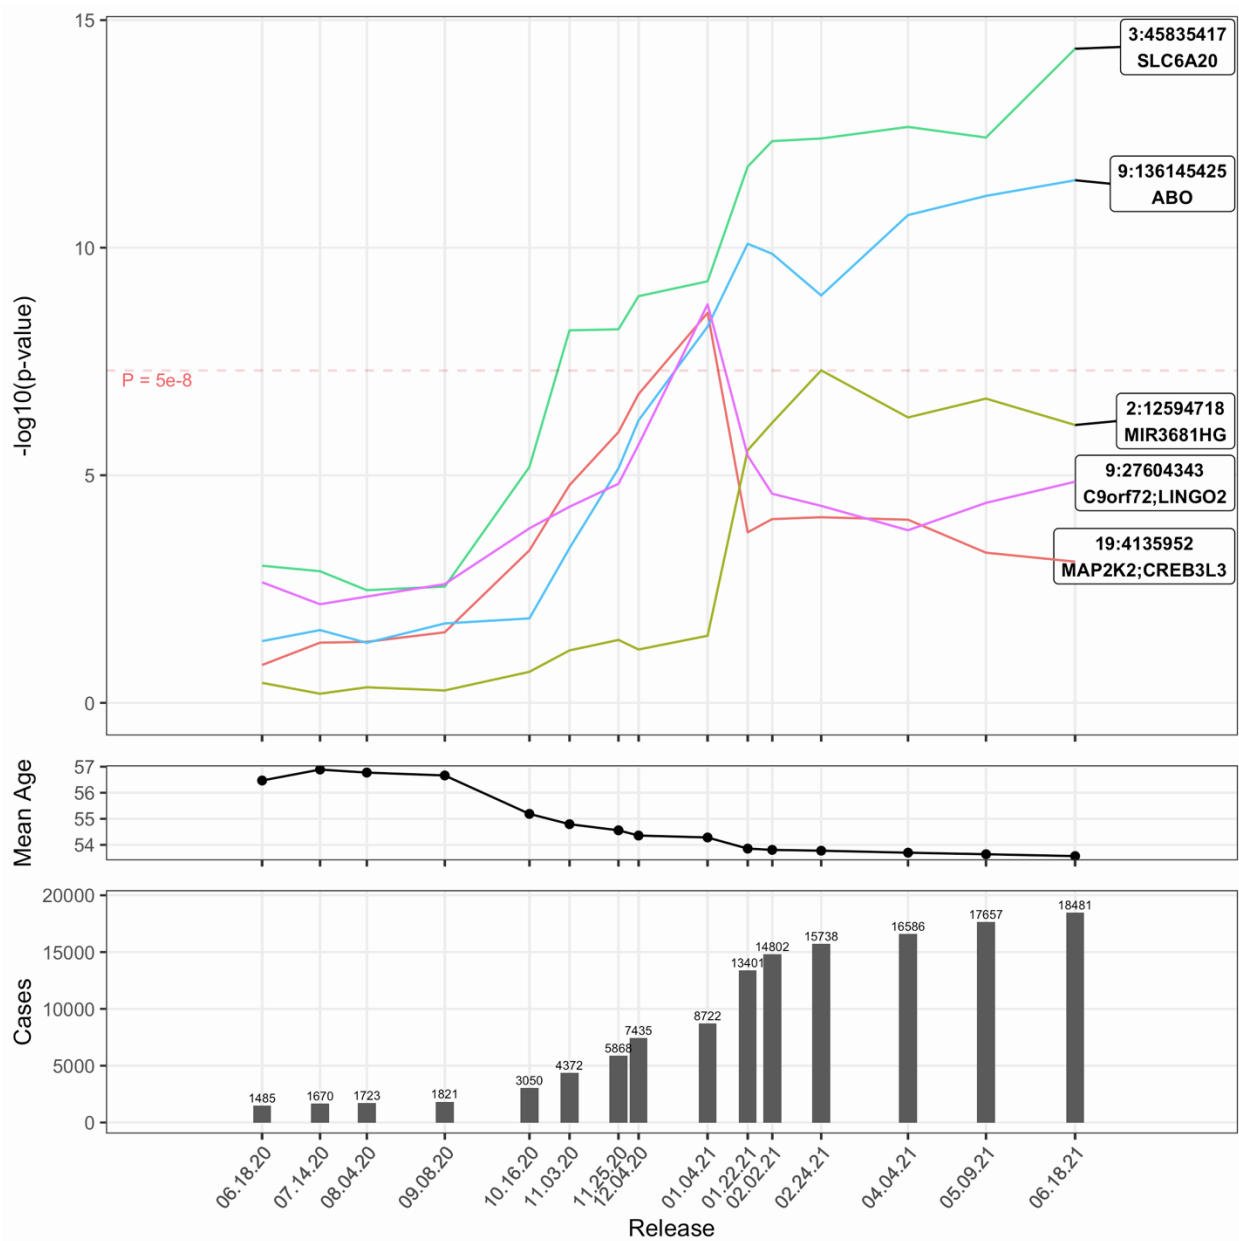

Figure S3: Covid-19 Susceptibility in ALL:Pop:F

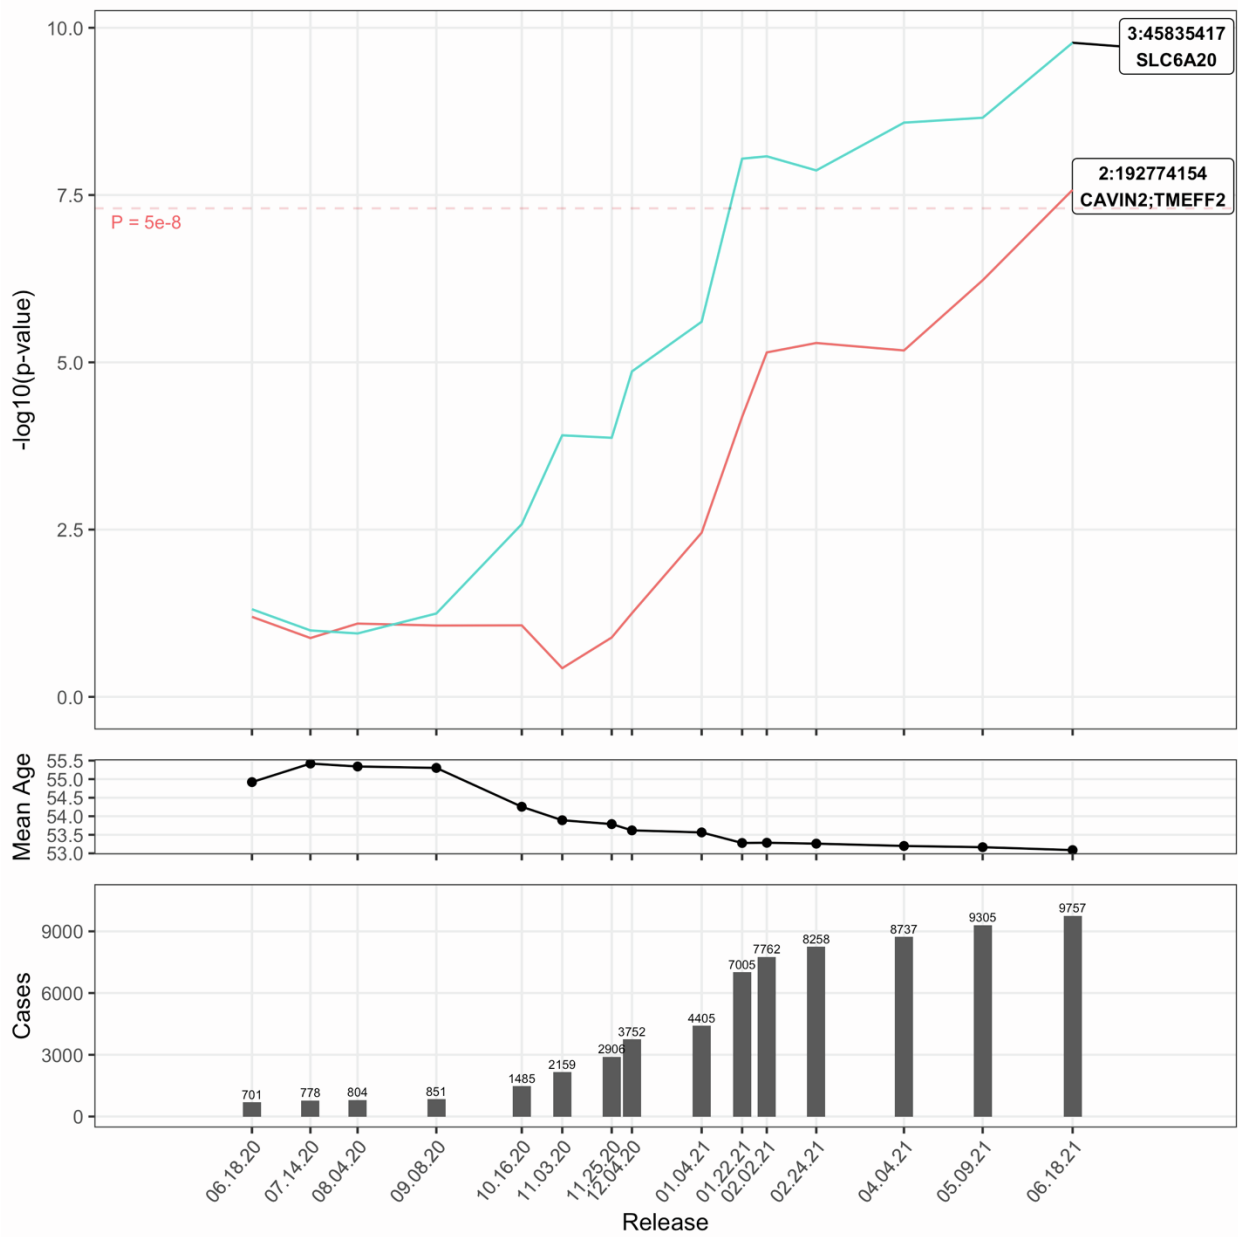

Figure S4: Covid-19 Susceptibility in ALL:Pop:M

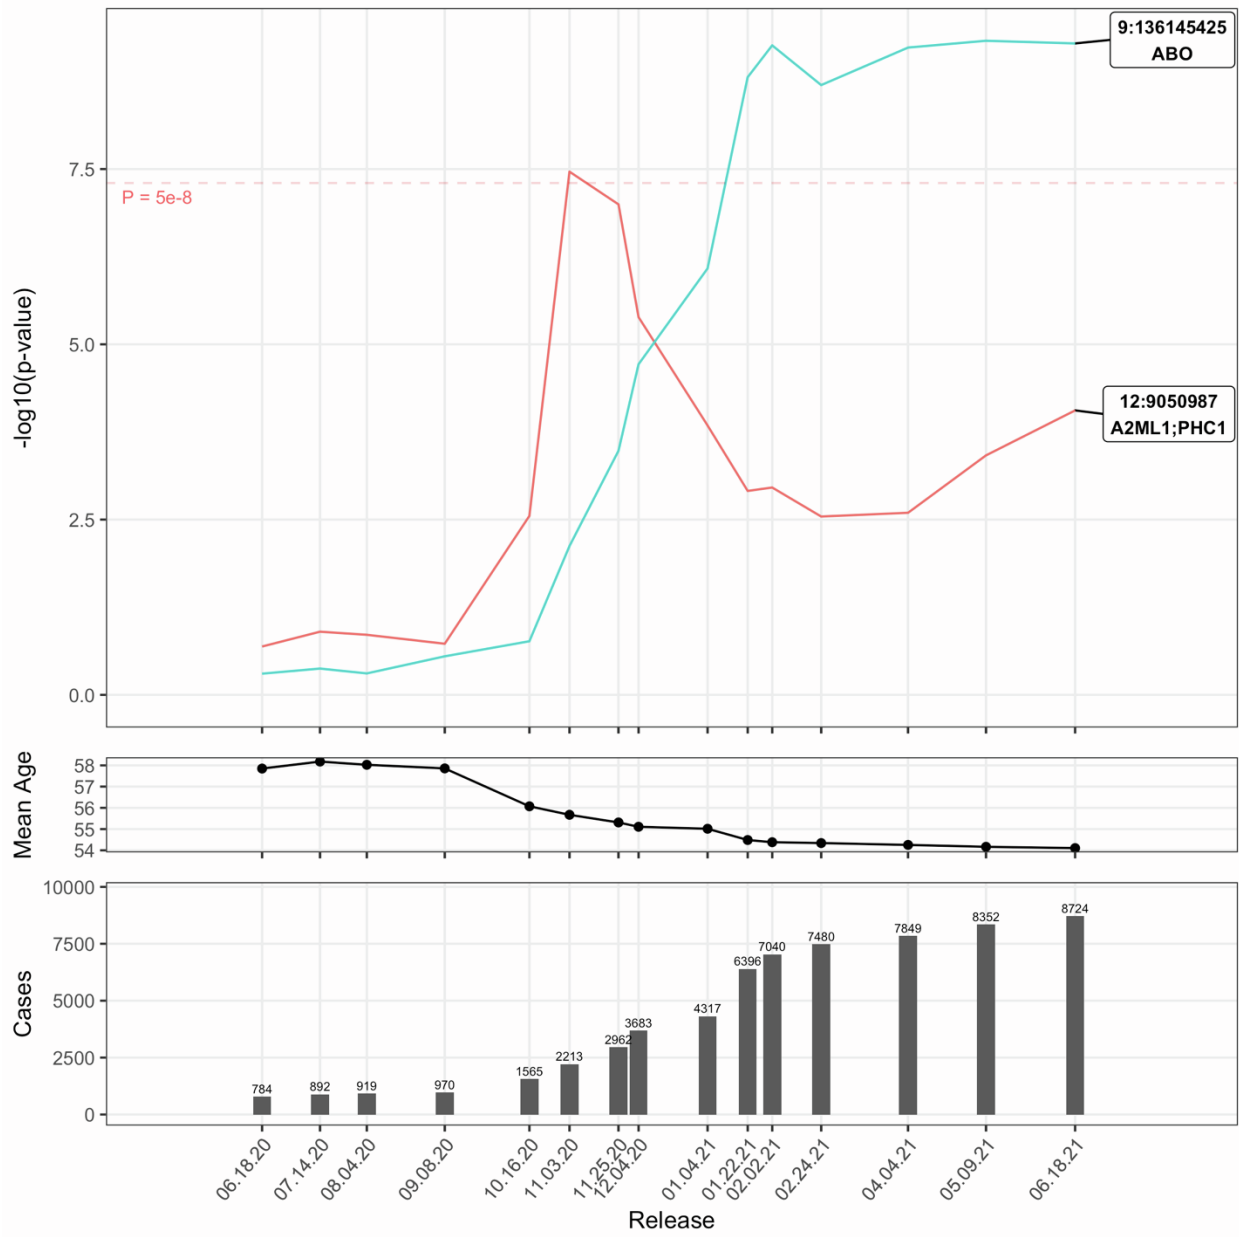

Figure S5: Covid-19 Susceptibility in ALL:Tested

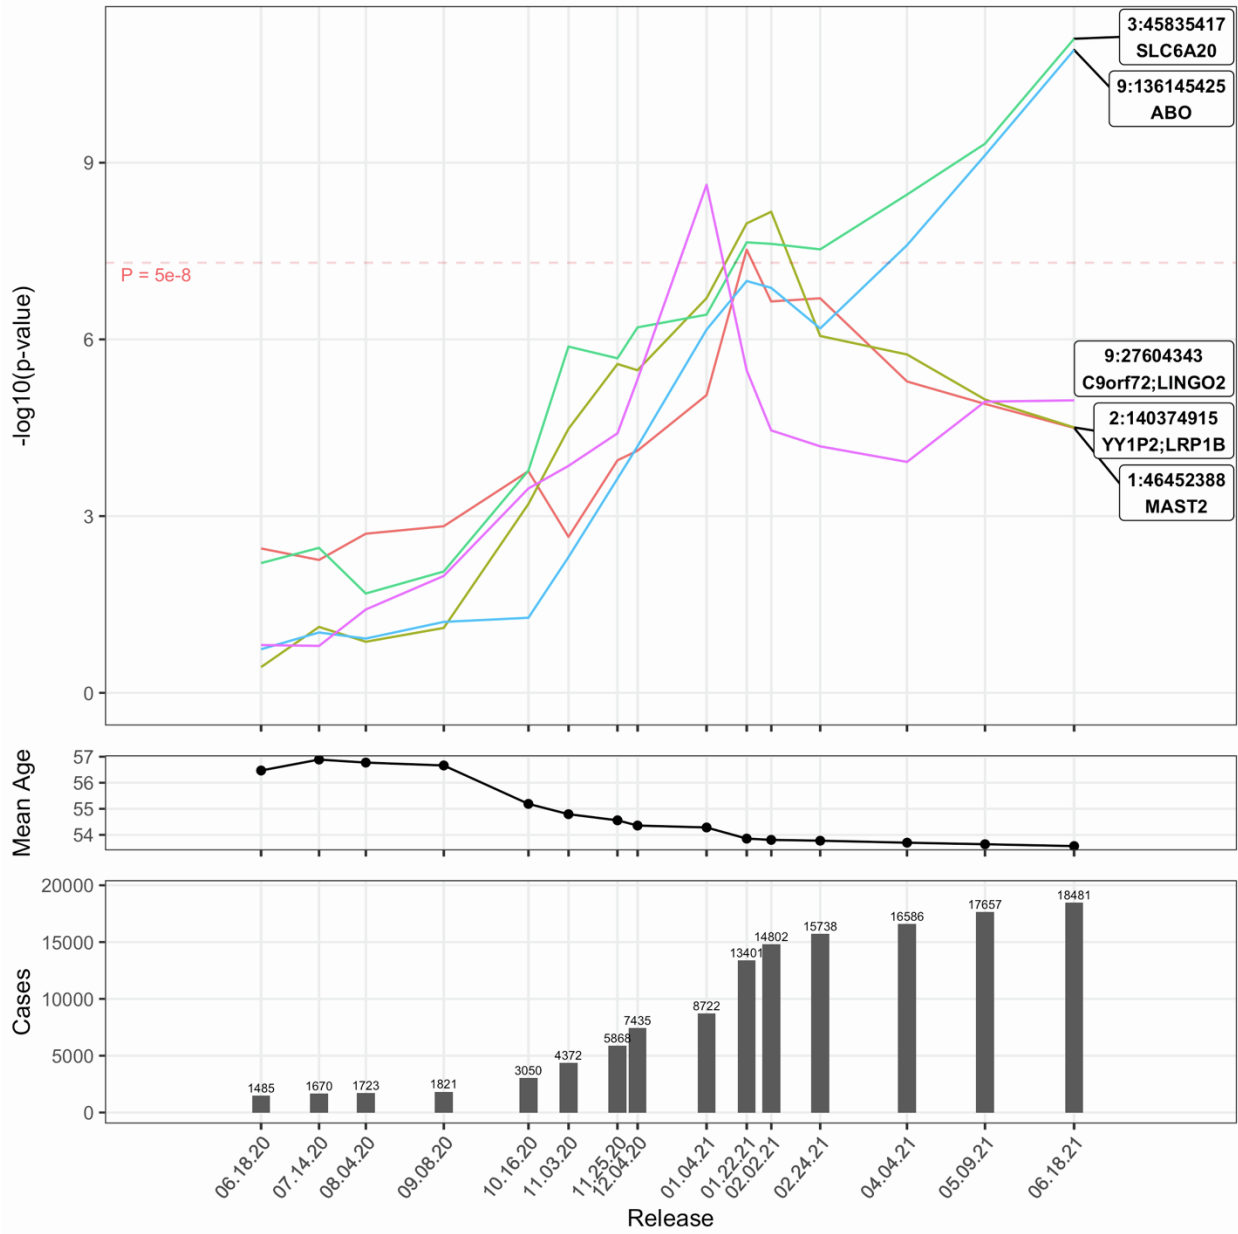

Figure S6: Covid-19 Susceptibility in ALL:Tested:F

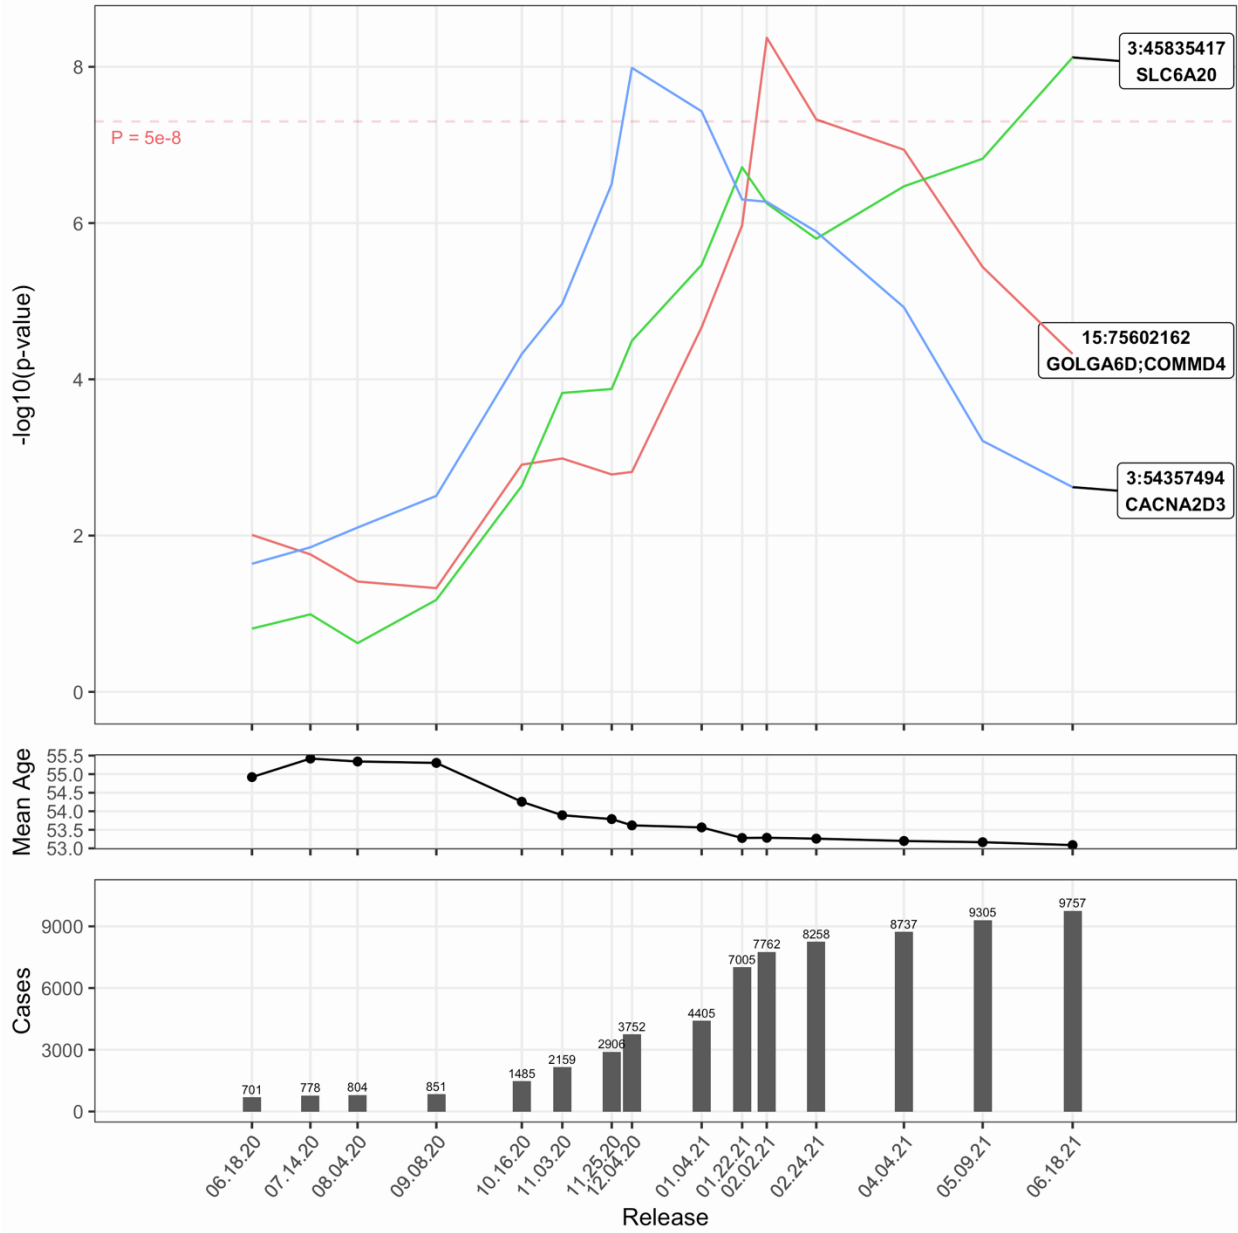



Figure S7: Covid-19 Susceptibility in ALL:Tested:M

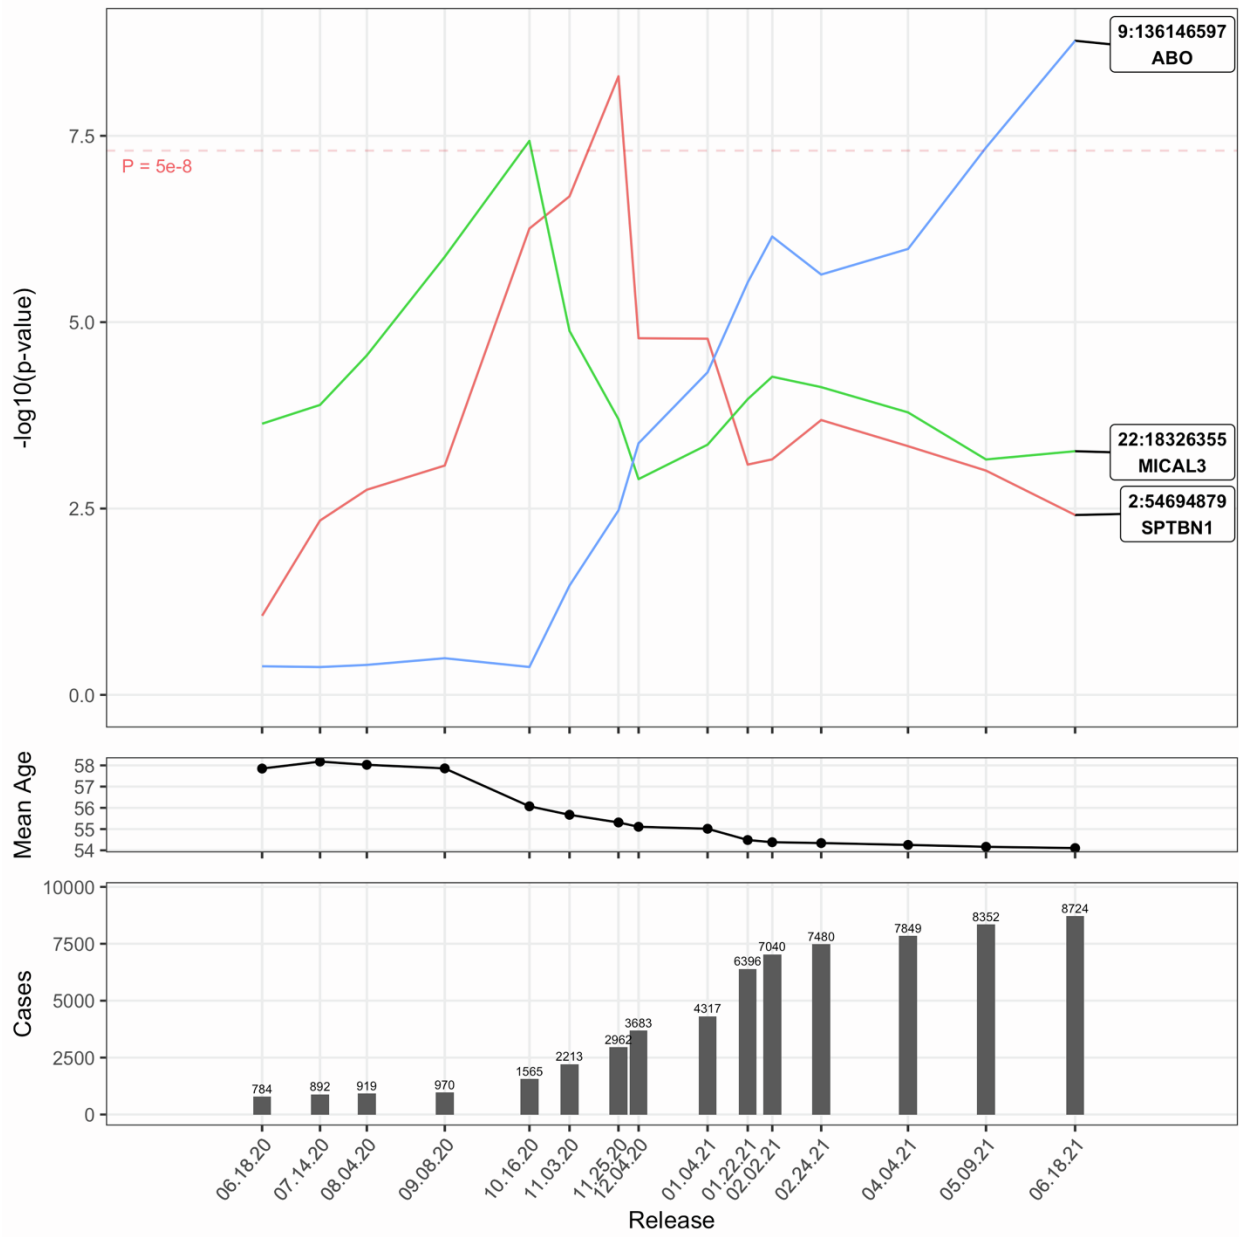

Figure S8: Covid-19 Susceptibility in EUR:Pop

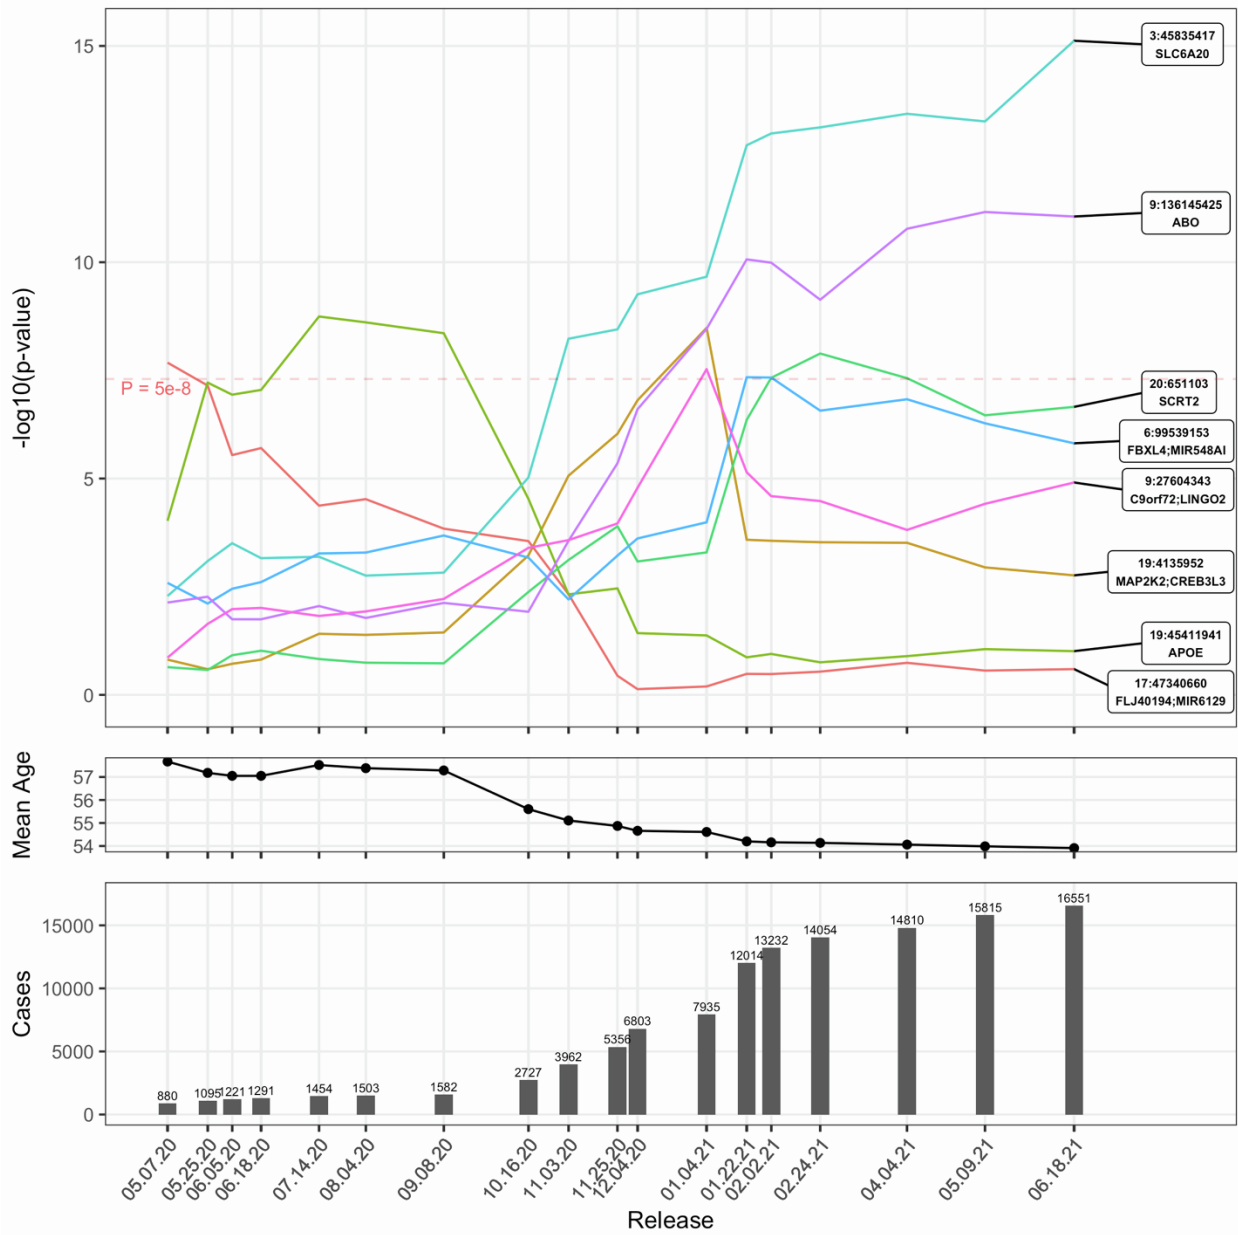

Figure S9: Covid-19 Susceptibility in EUR:Pop:F

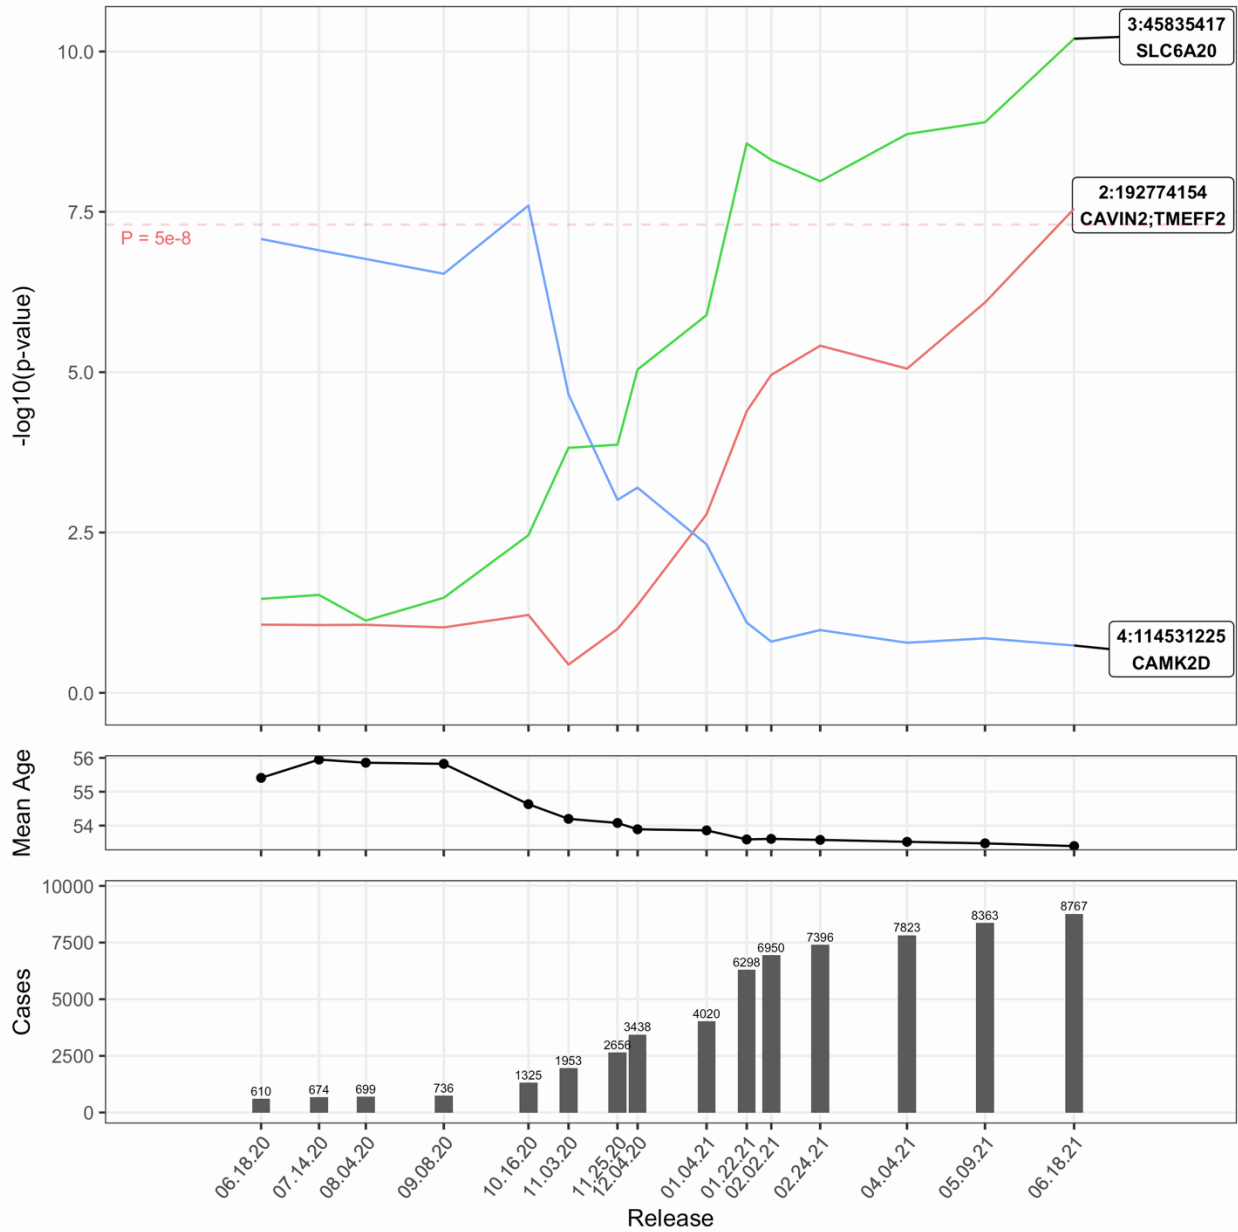

Figure S10: Covid-19 Susceptibility in EUR:Pop:M

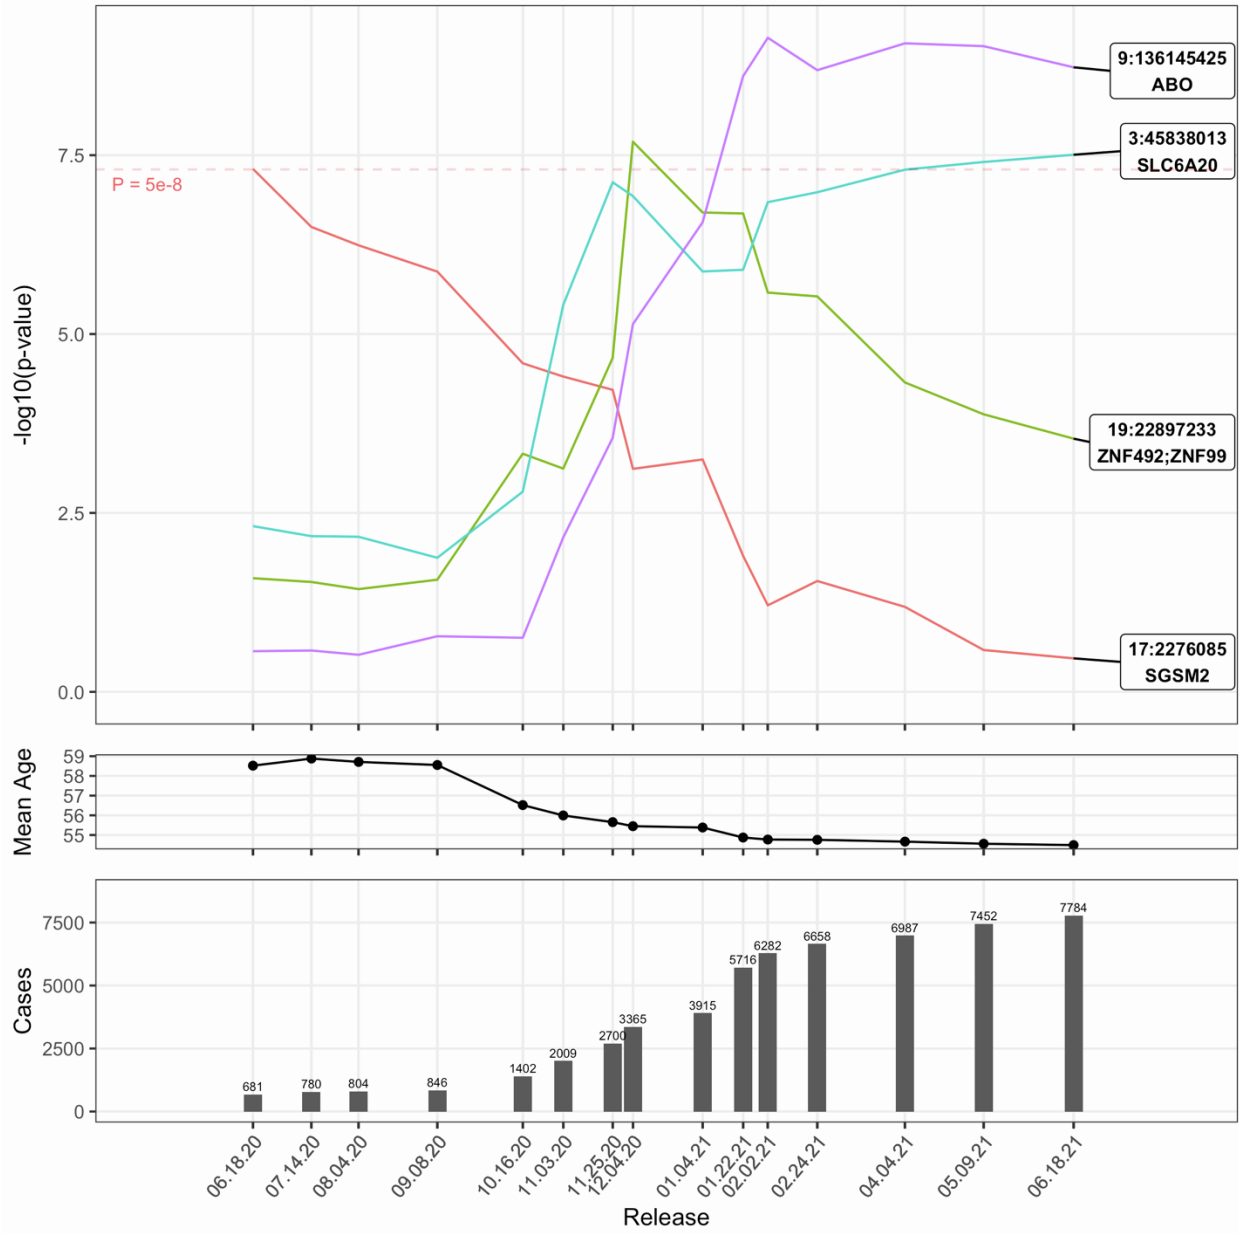

Figure S11: Covid-19 Susceptibility in EUR:Tested

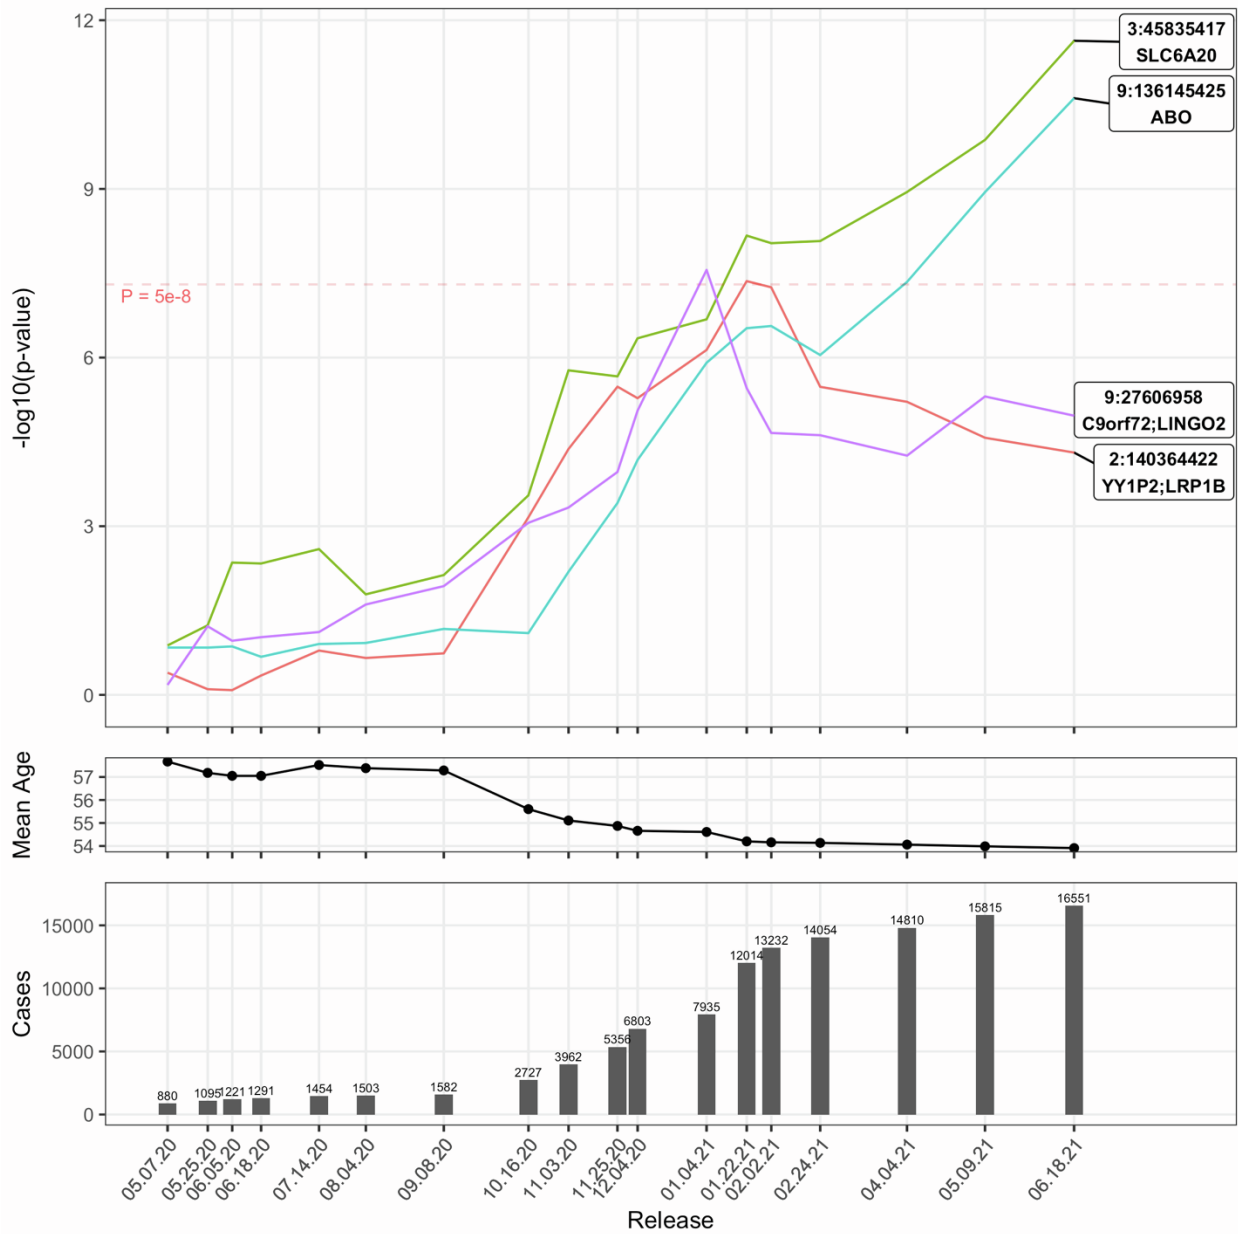

Figure S12: Covid-19 Susceptibility in EUR:Tested:F

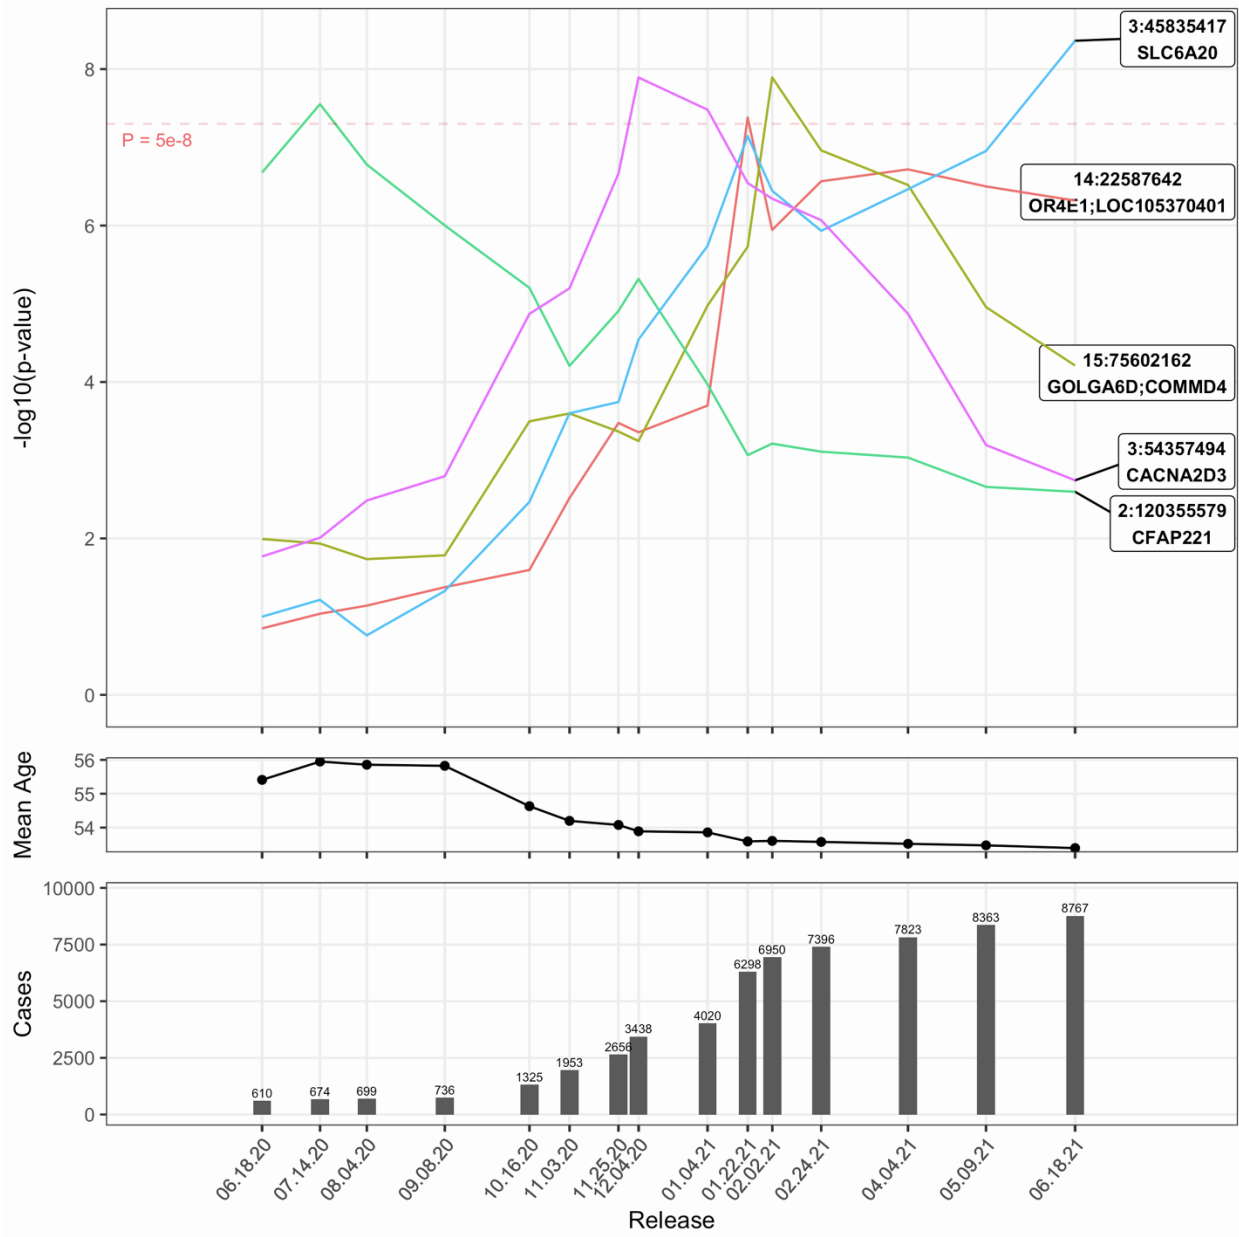

Figure S13: Covid-19 Susceptibility in EUR:Tested:M

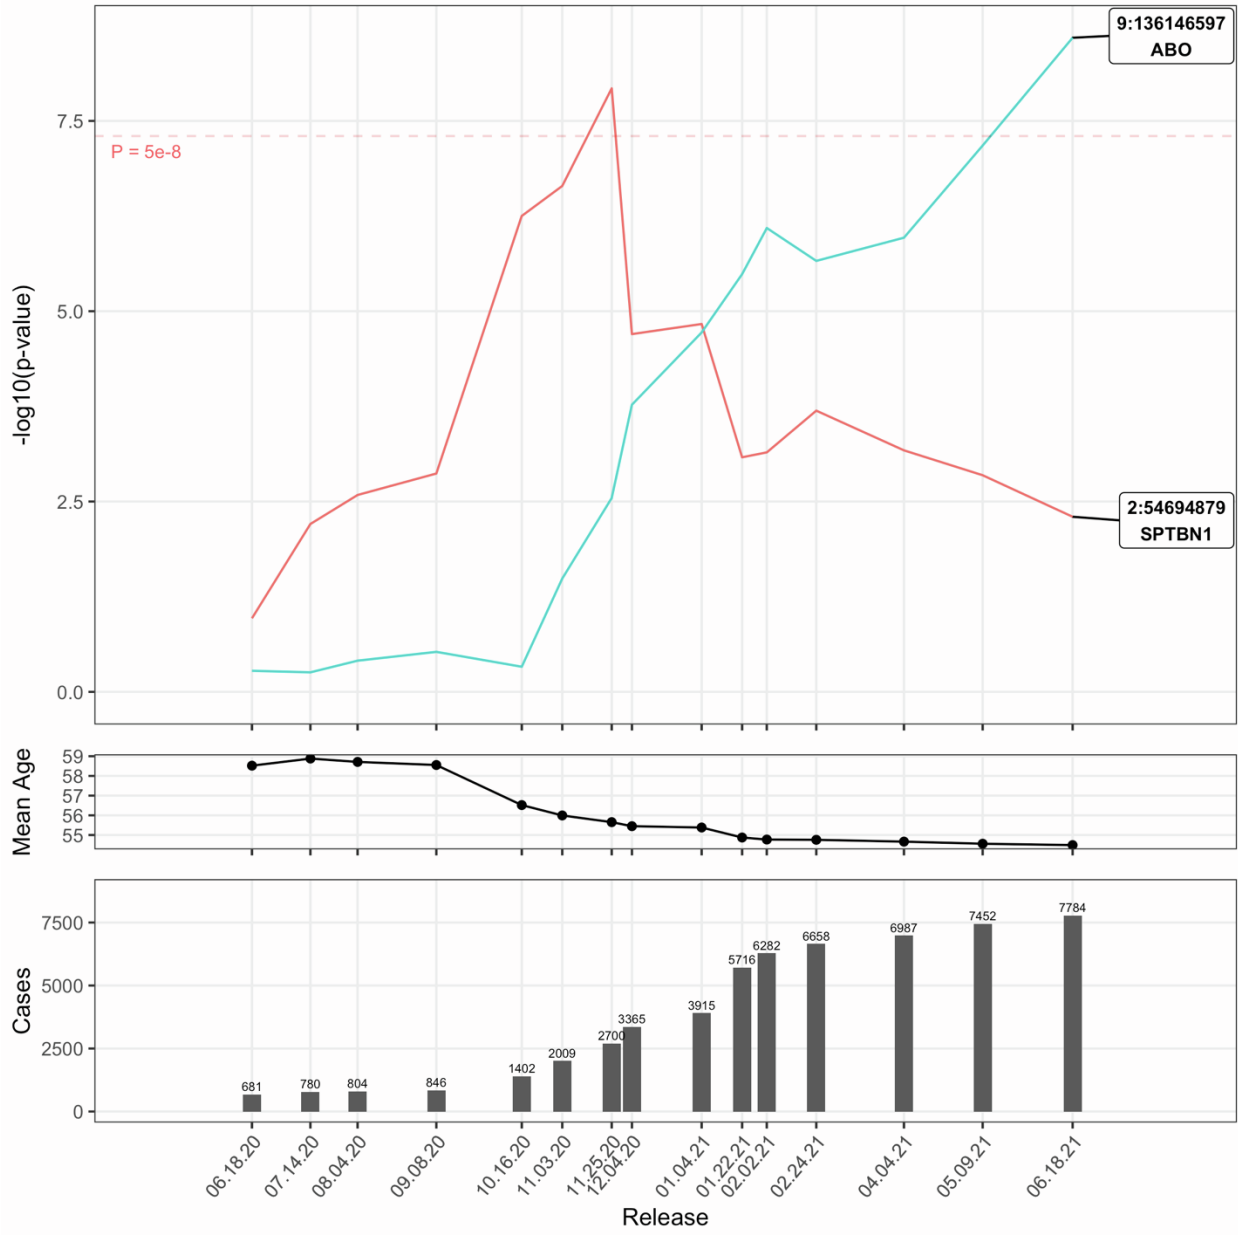

Figure S14: Covid-19 Susceptibility in AFR:Pop

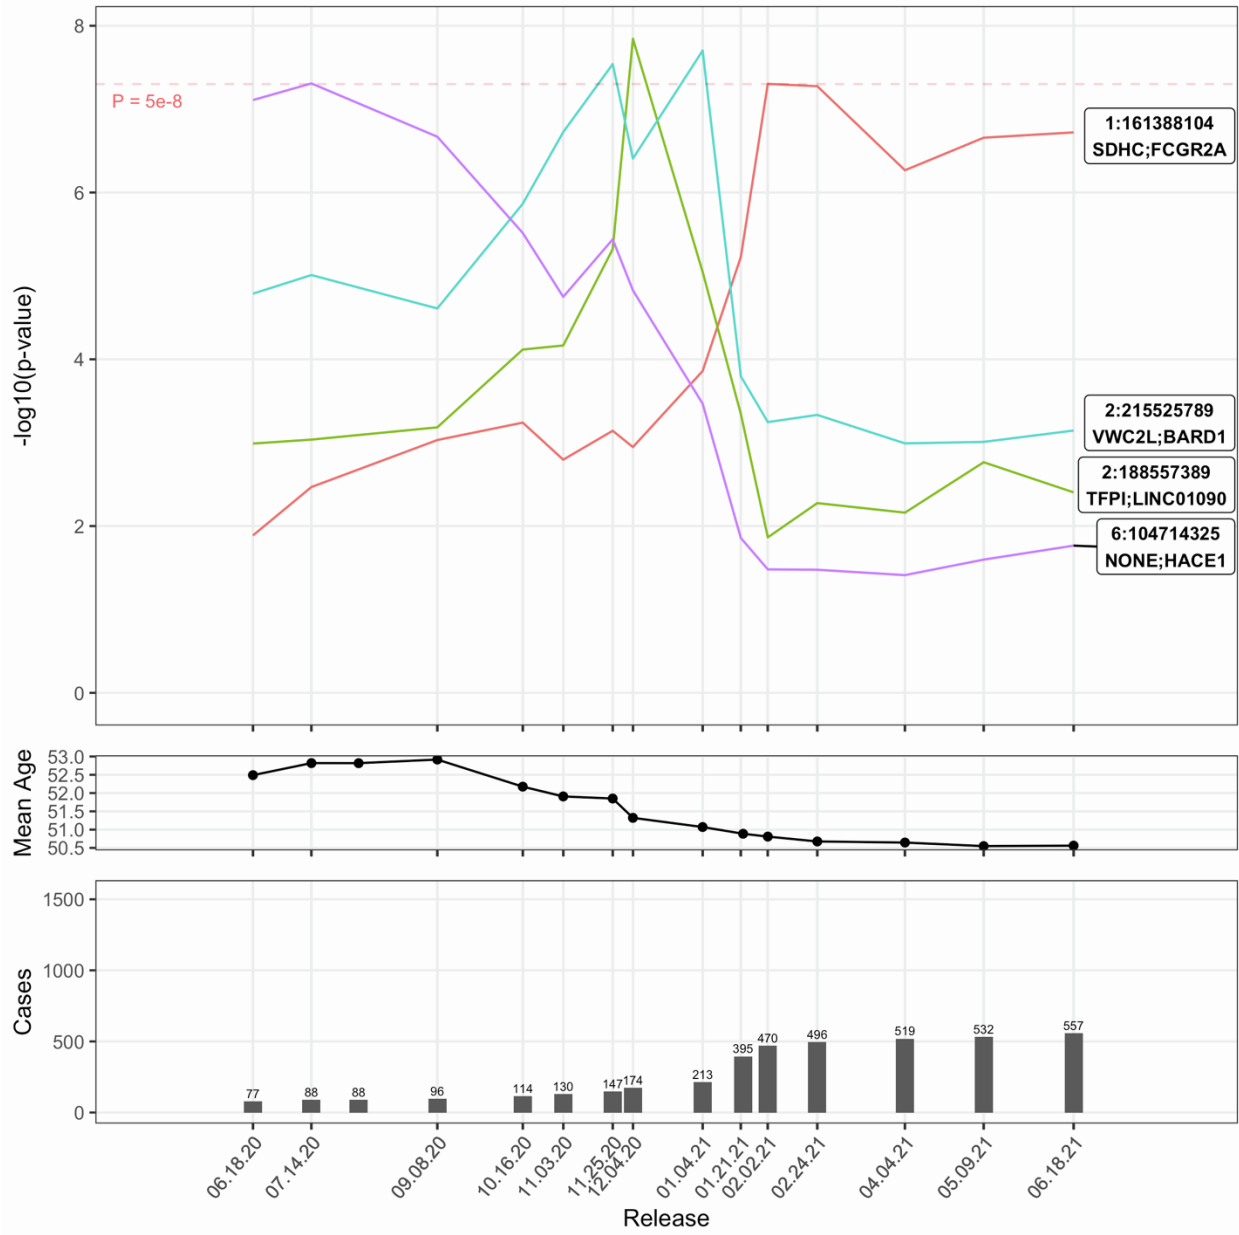



Figure S15: Covid-19 Susceptibility in AFR:Tested

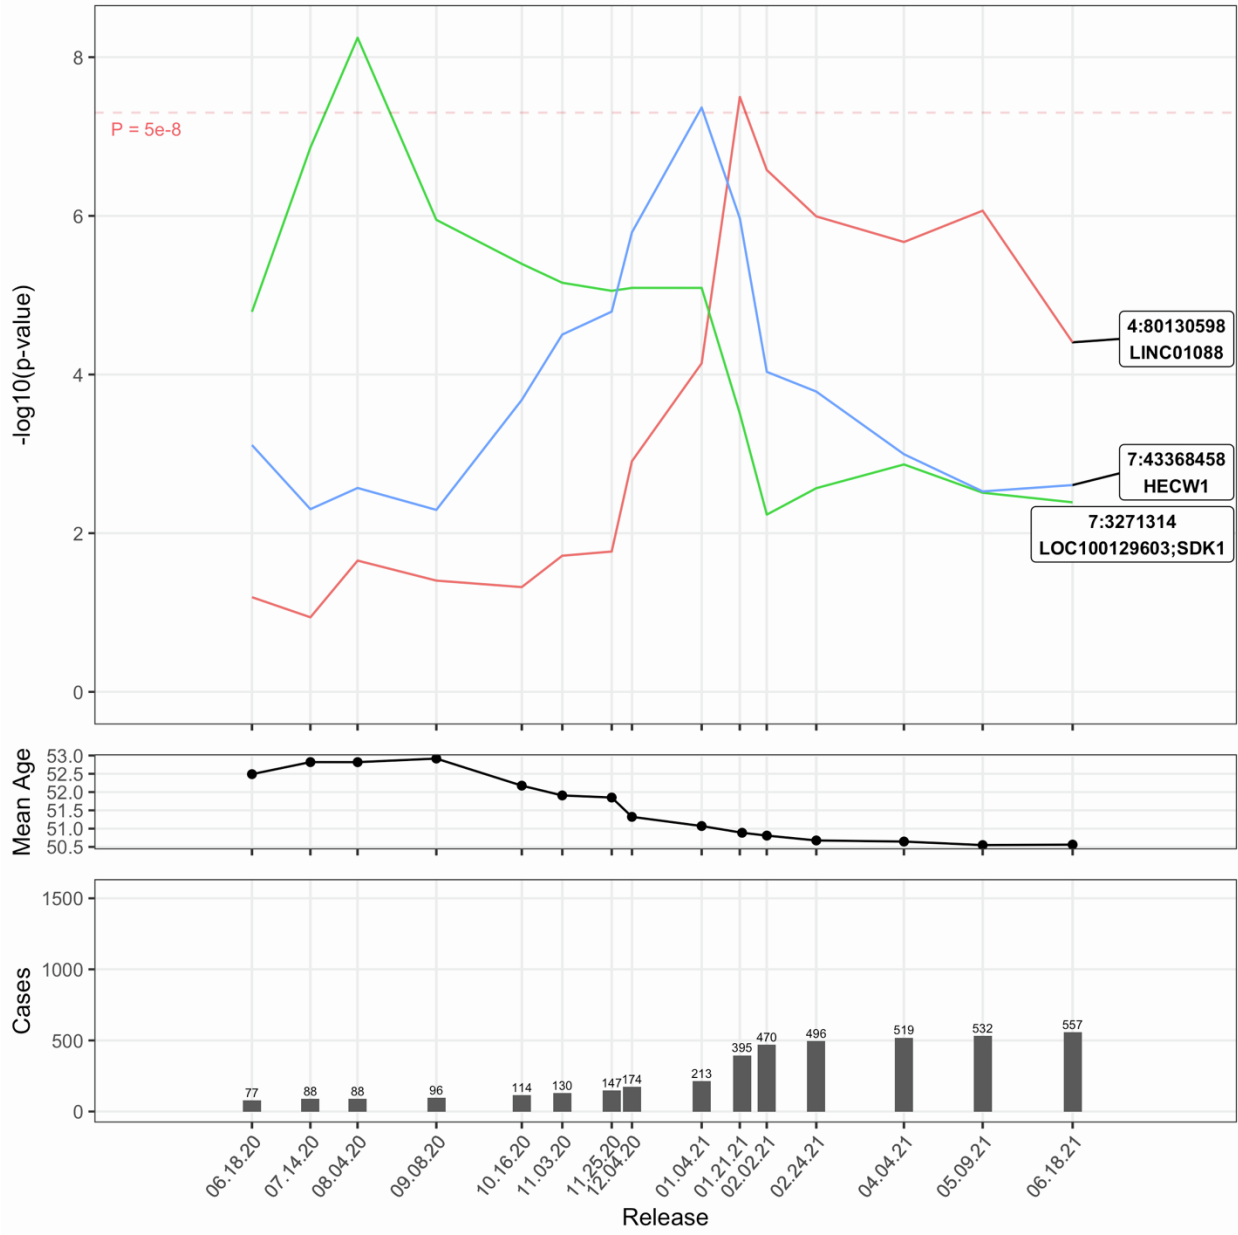

Figure S16: Covid-19 Susceptibility in SAS:Pop

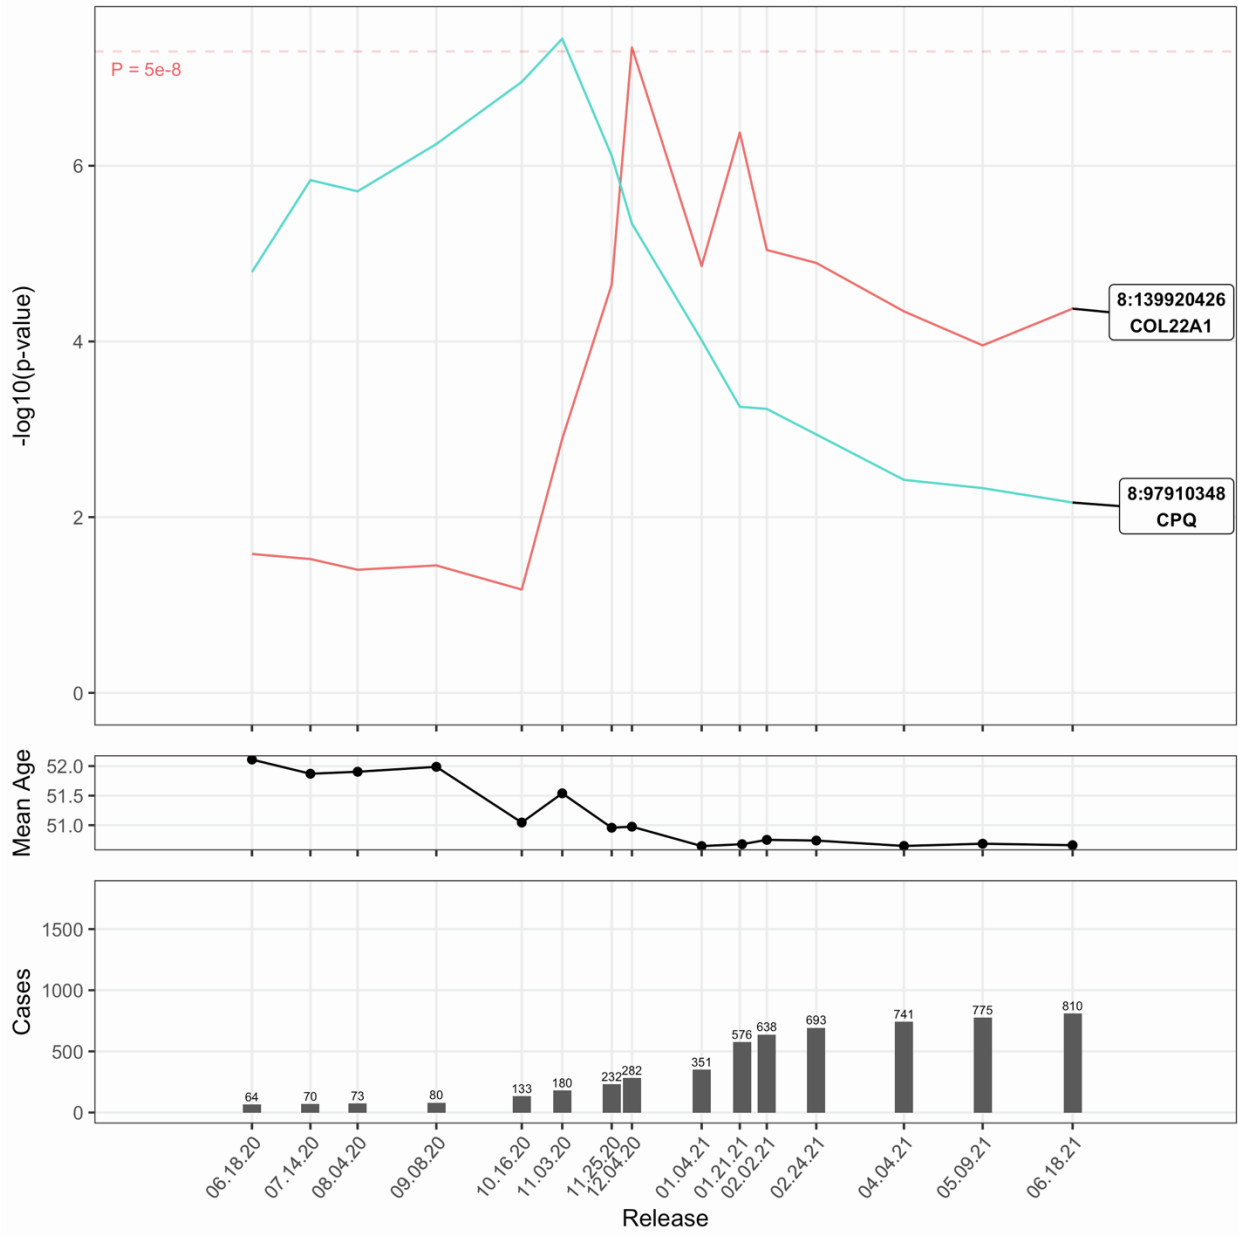

Figure S17: Covid-19 Susceptibility in SAS:Tested

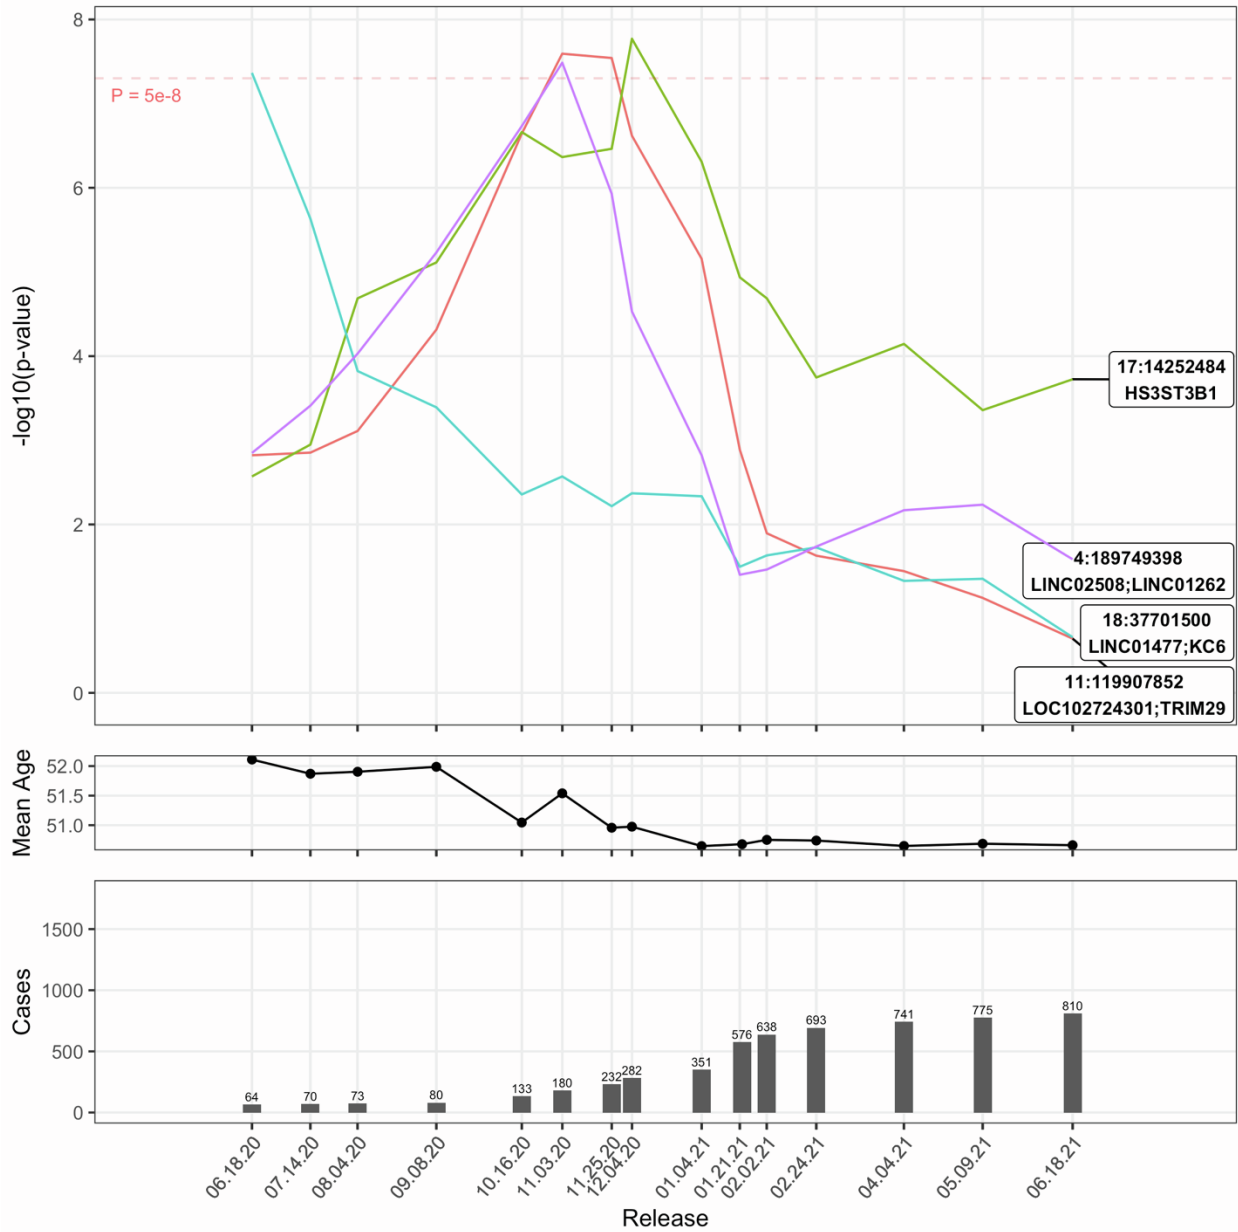

Figure S18: Covid-19 Susceptibility in OTHERS:Tested

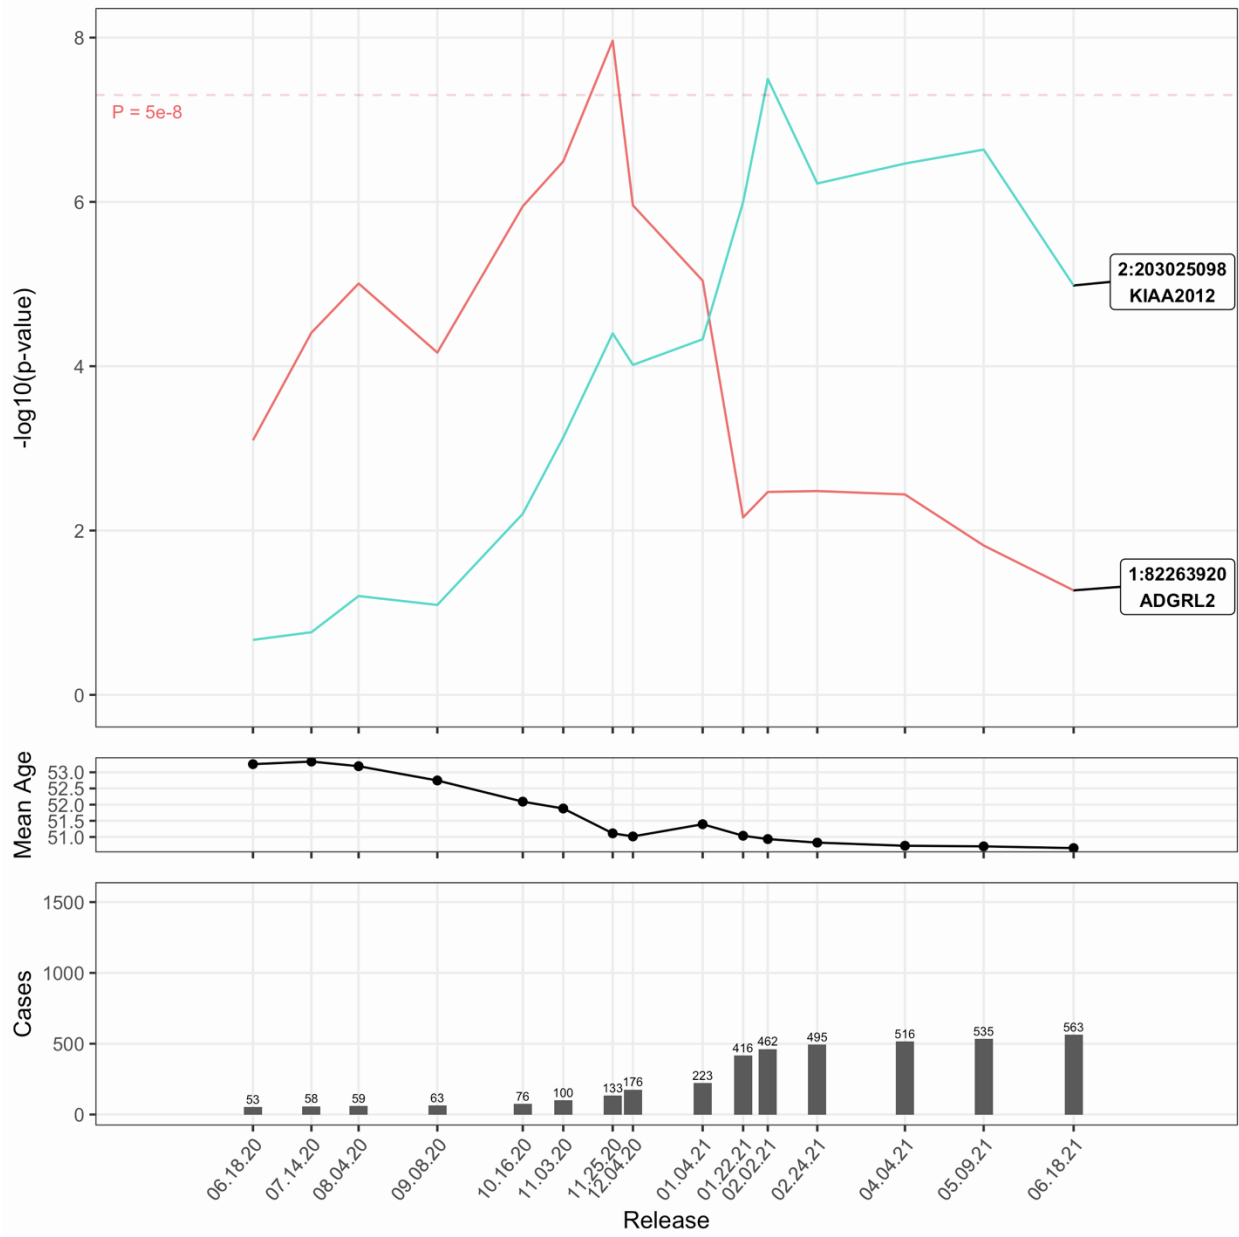

Figure S19: Covid-19 Susceptibility in nEUR:Pop

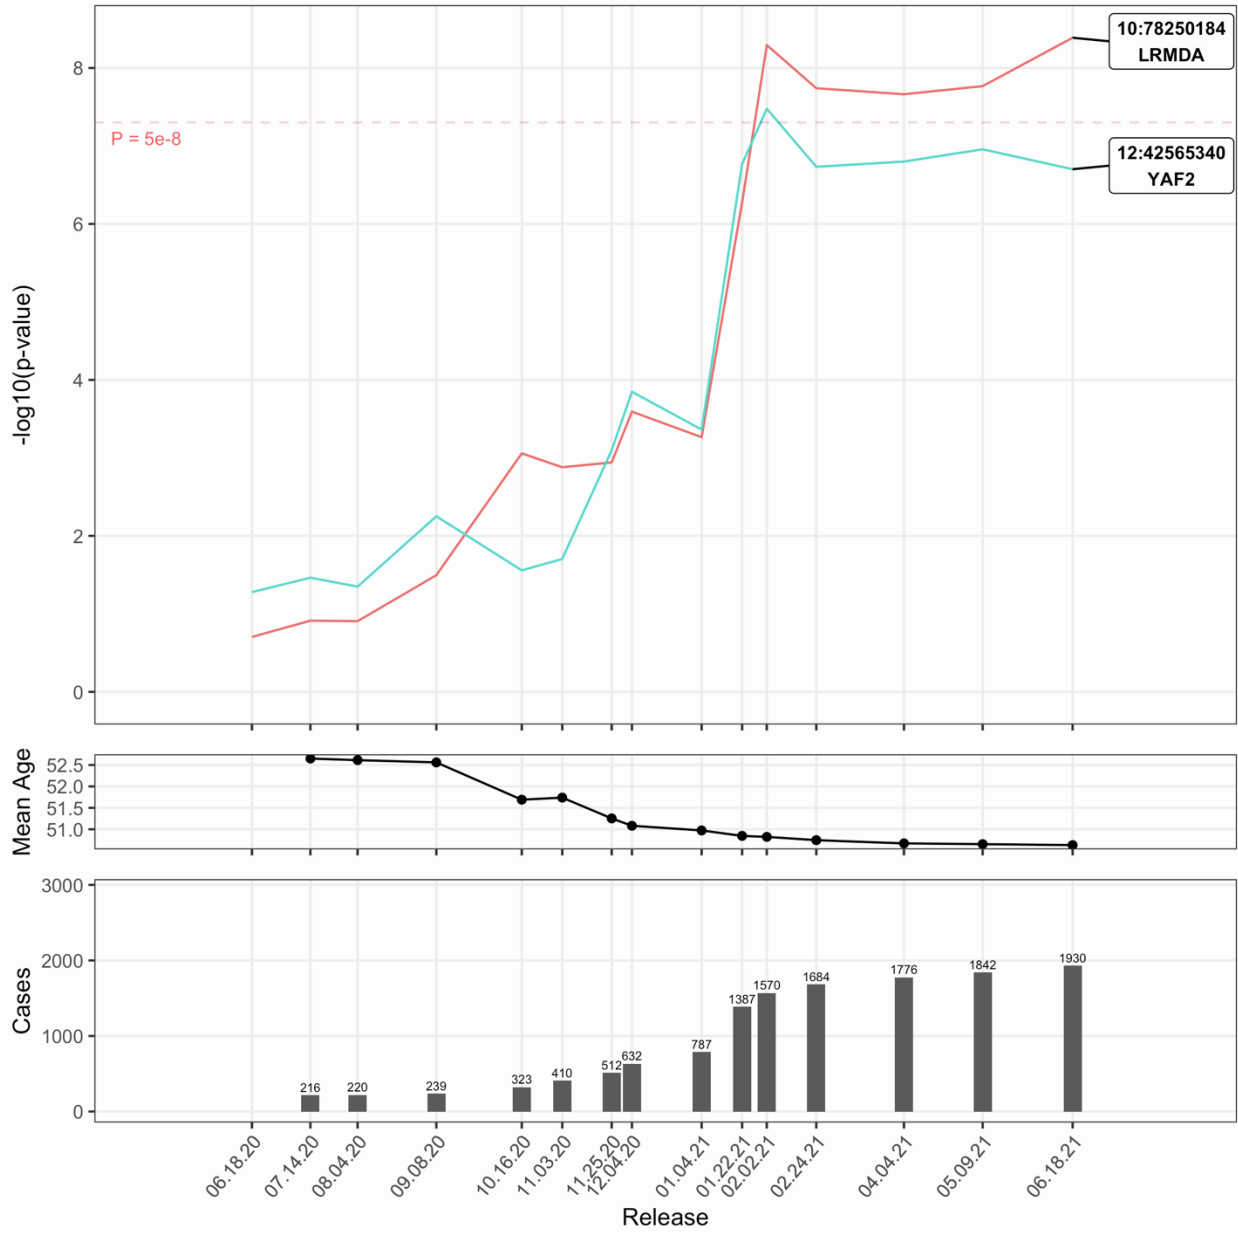

Figure S20: Covid-19 Hospitalization in ALL:Pop

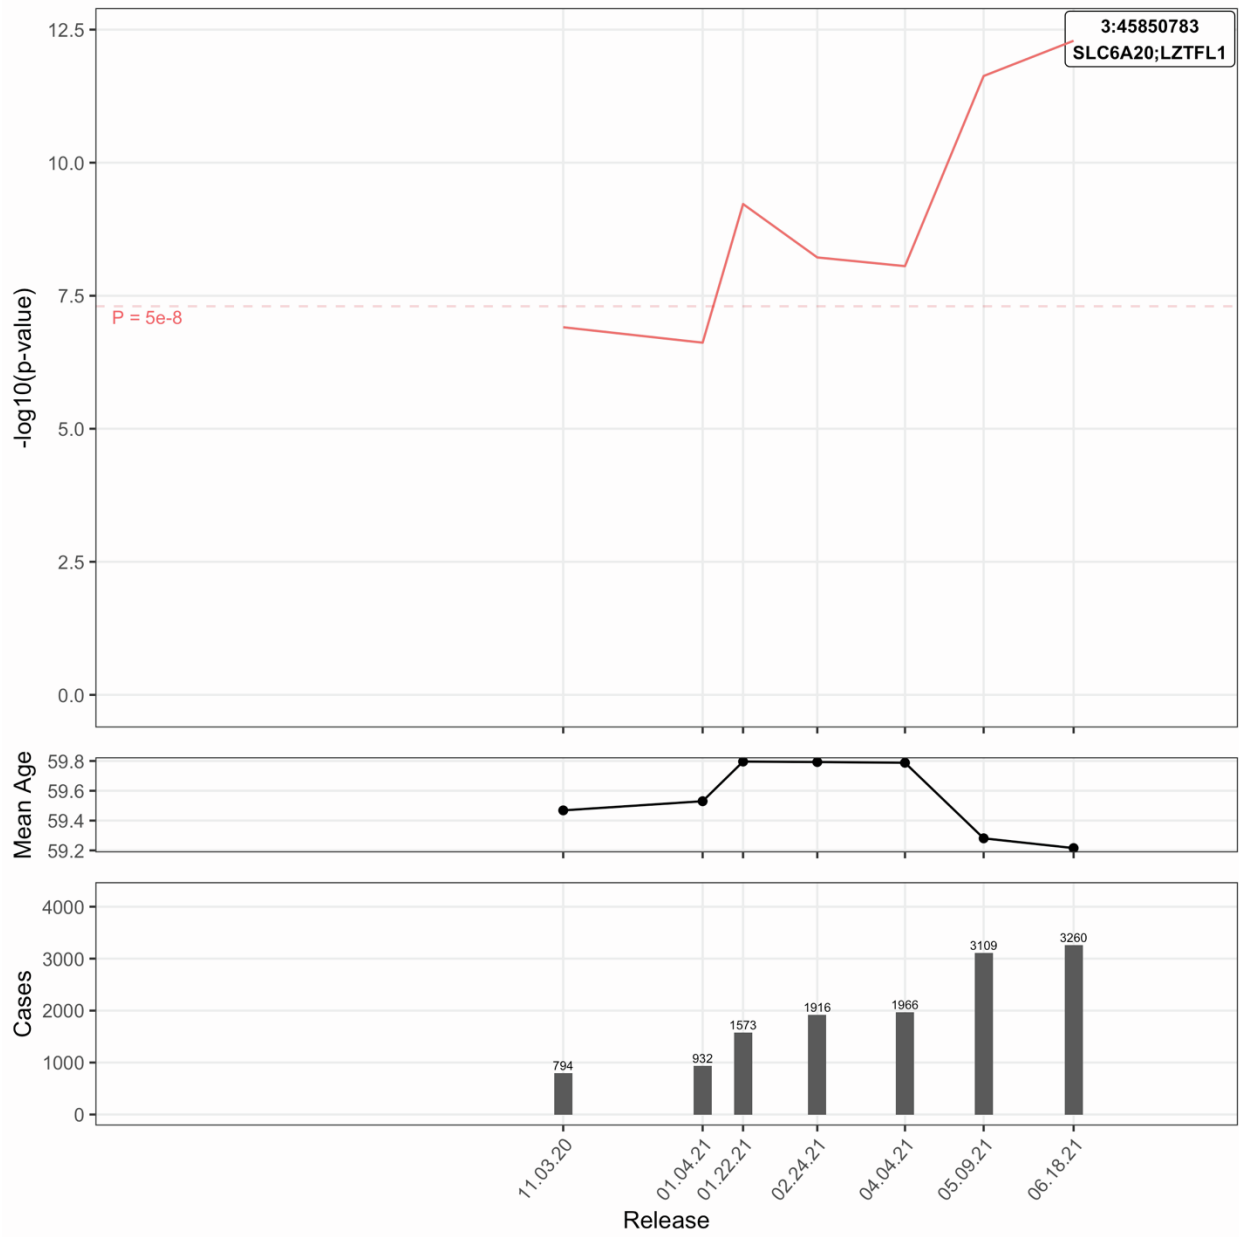

Figure S21: Covid-19 Hospitalization in ALL:Pop:M

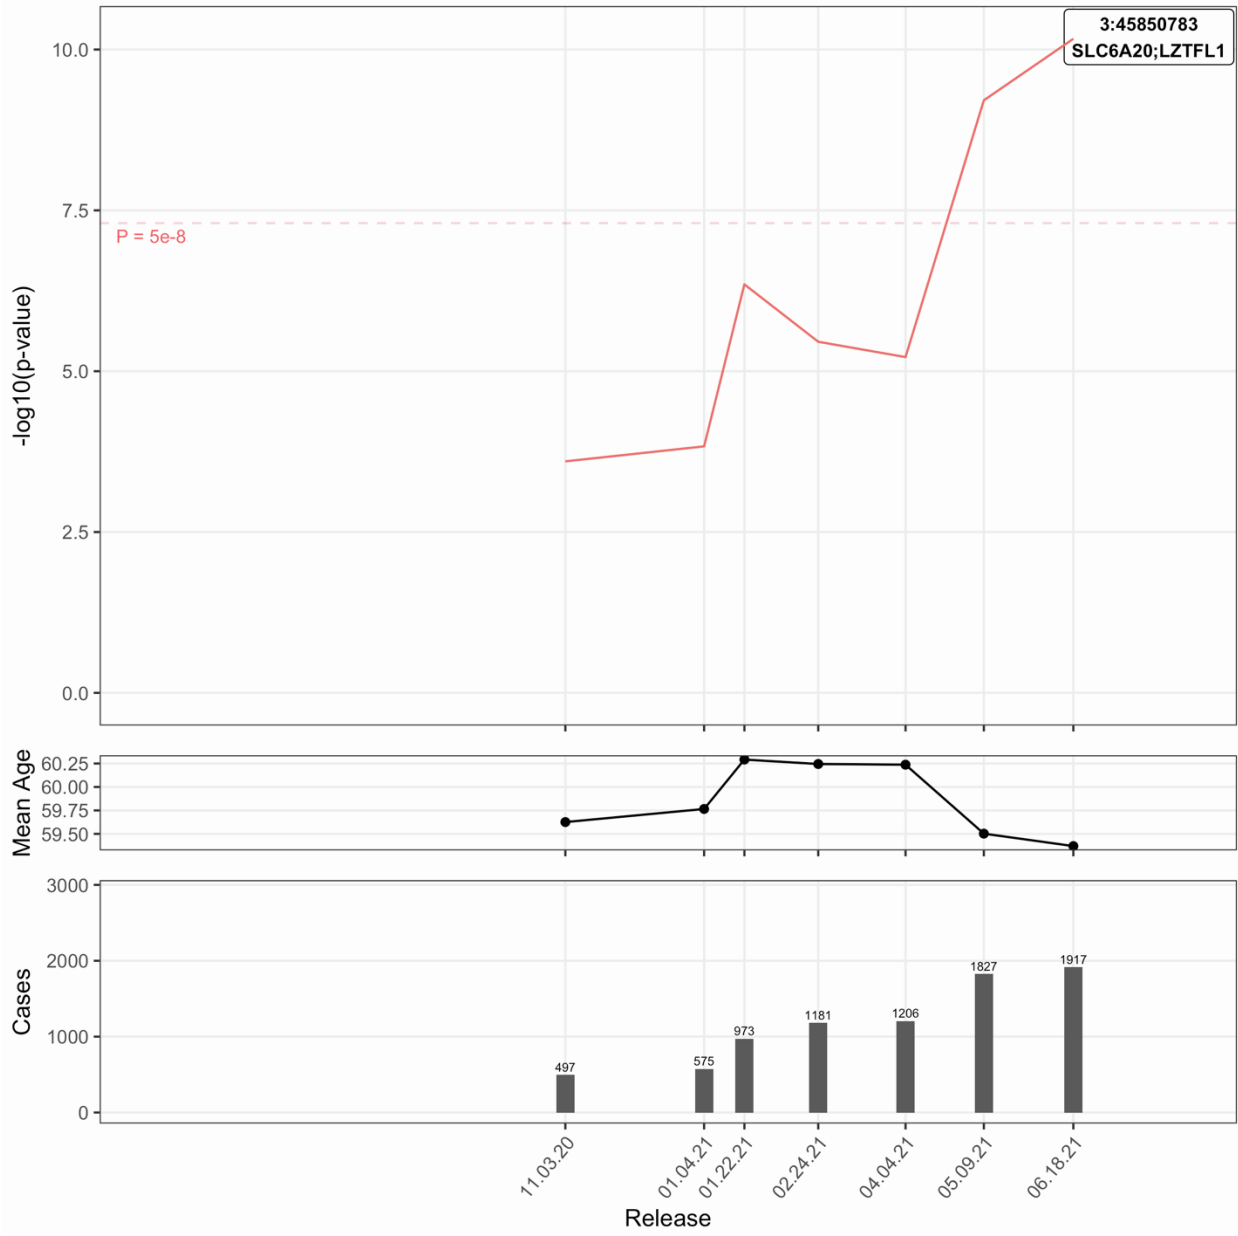

Figure S22: Covid-19 Hospitalization in ALL:Tested

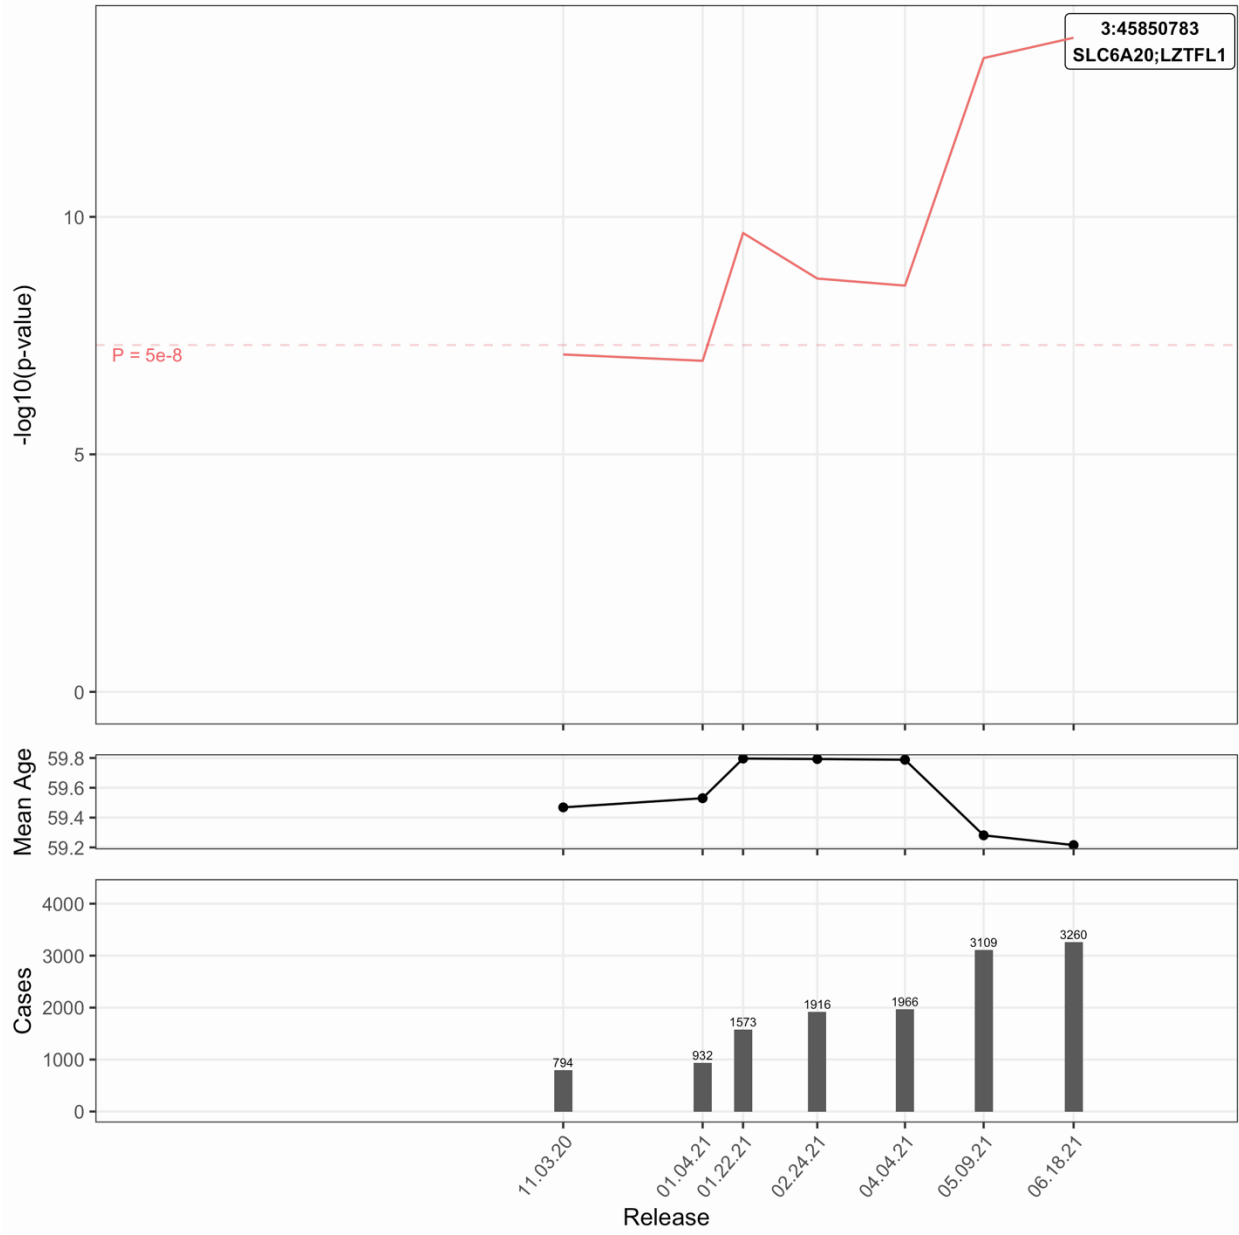



Figure S23: Covid-19 Hospitalization in ALL:Tested:M

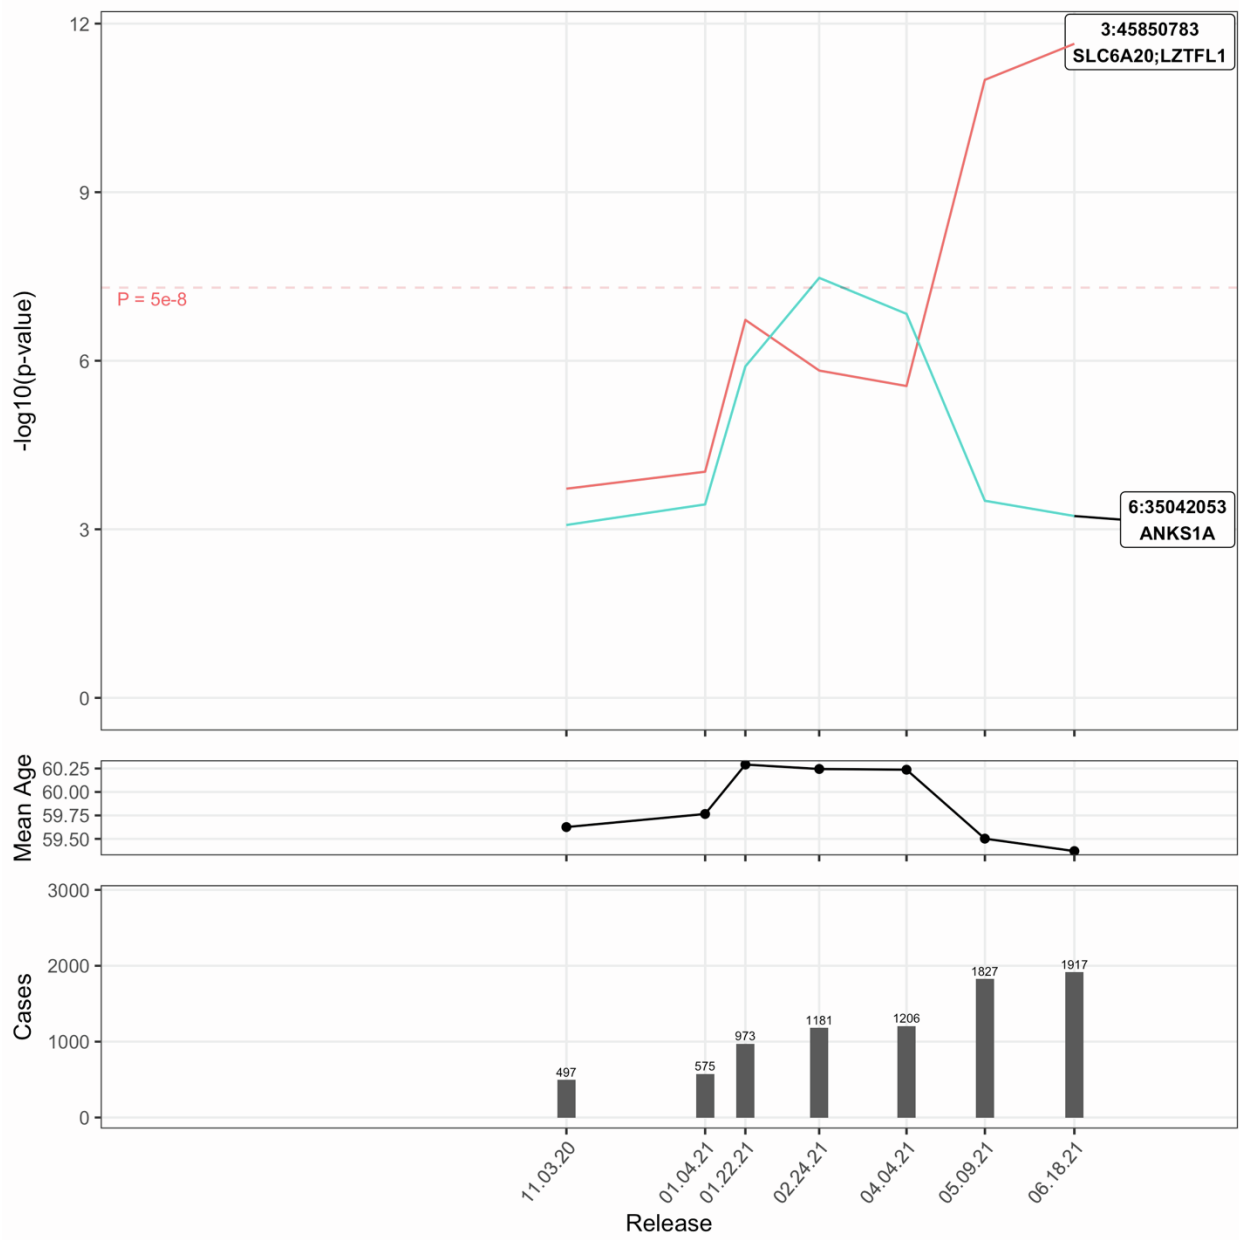

Figure S24: Covid-19 Hospitalization in ALL:Positive

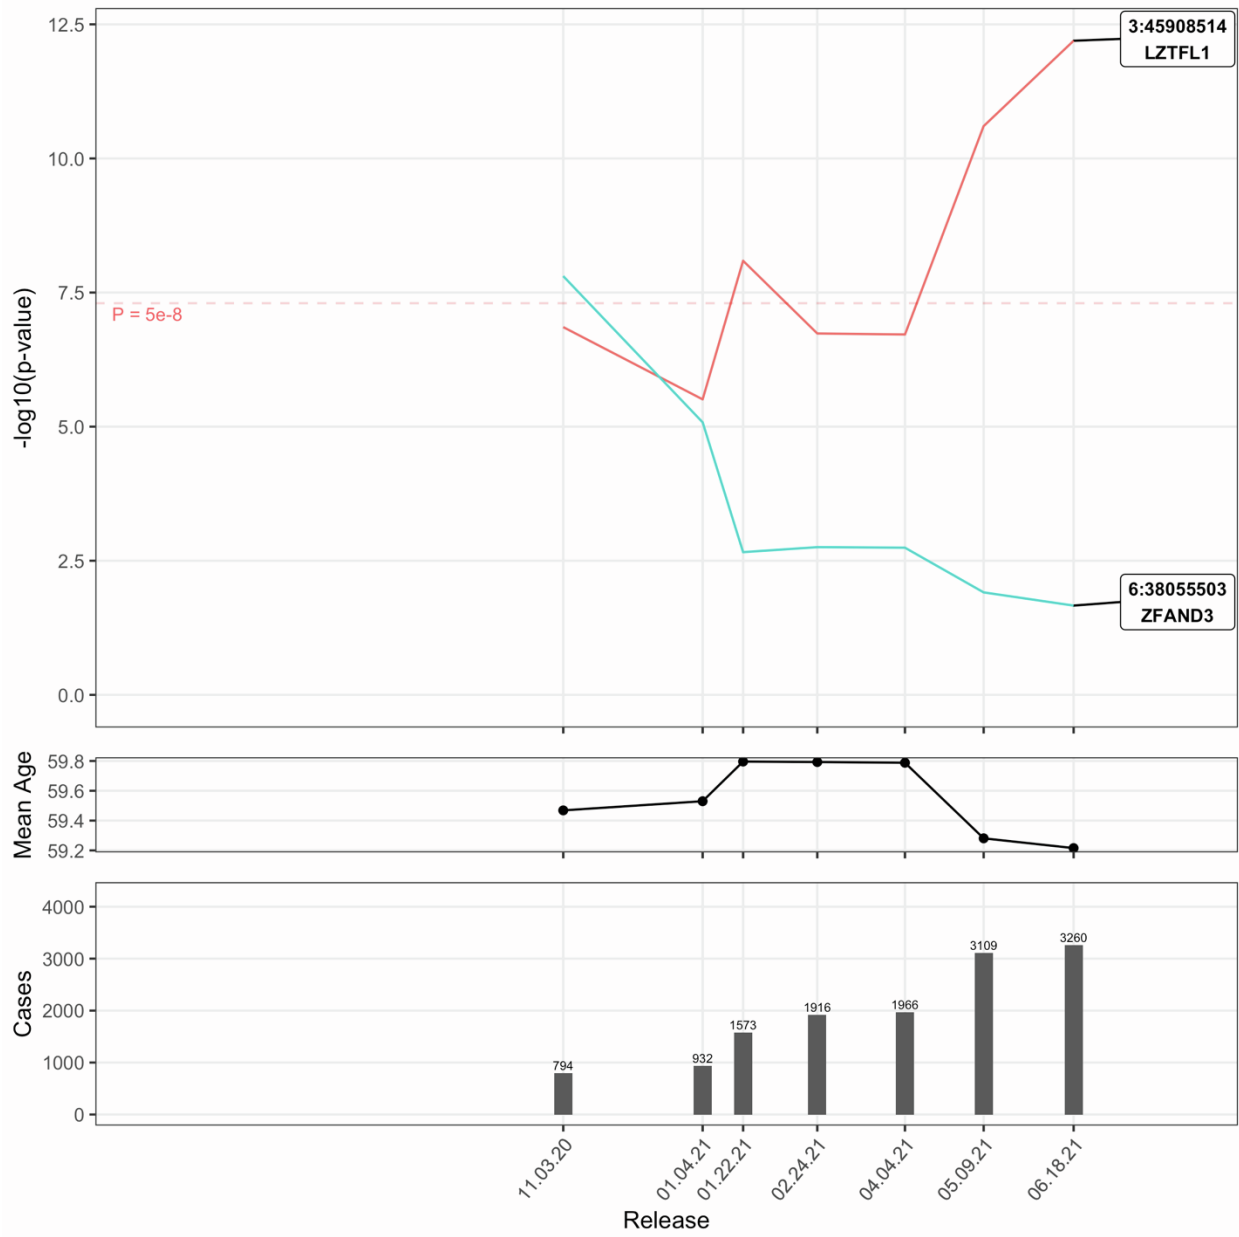

Figure S25: Covid-19 Hospitalization in ALL:Positive:M

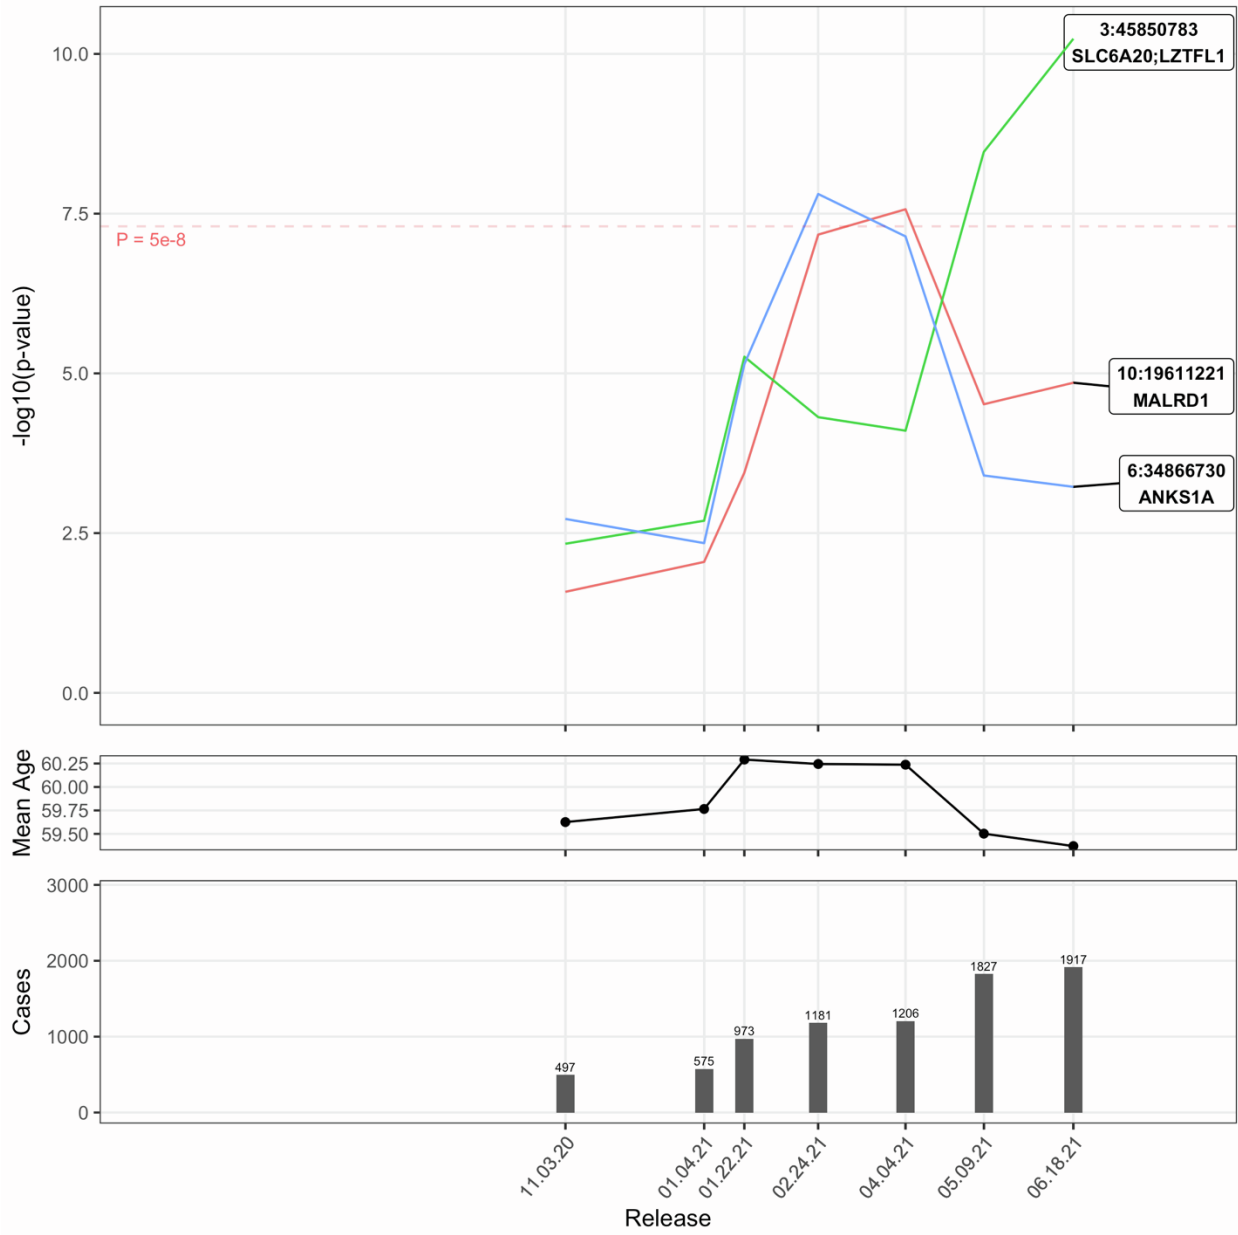

Figure S26: Covid-19 Hospitalization in EUR:Pop

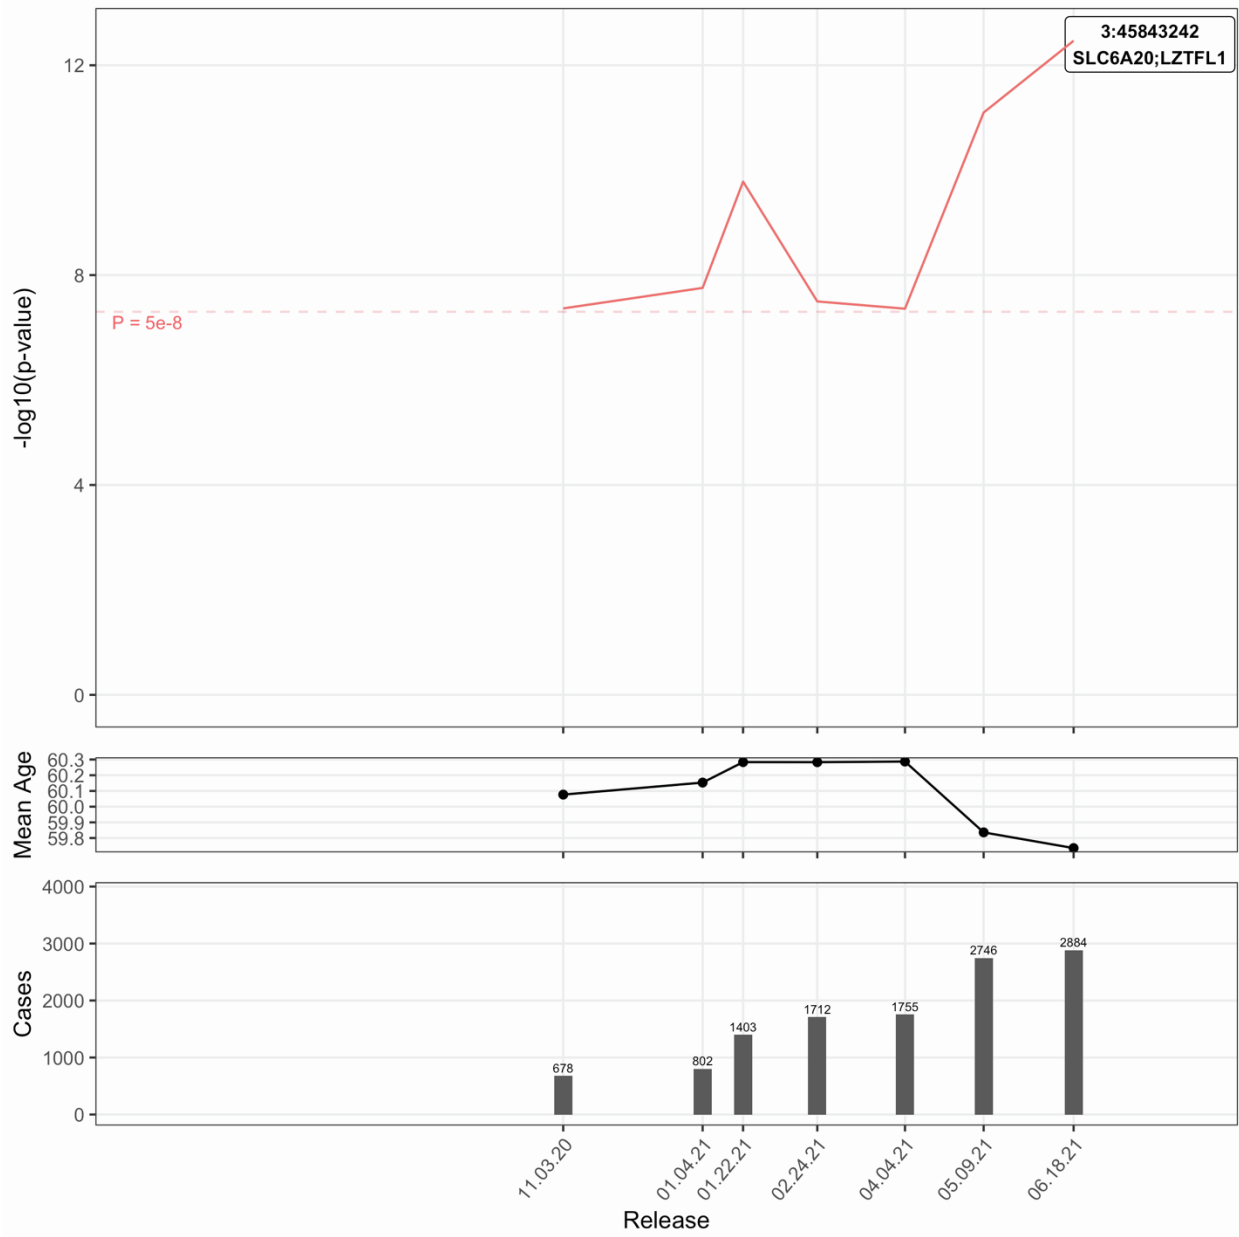

Figure S27: Covid-19 Hospitalization in EUR:Pop:M

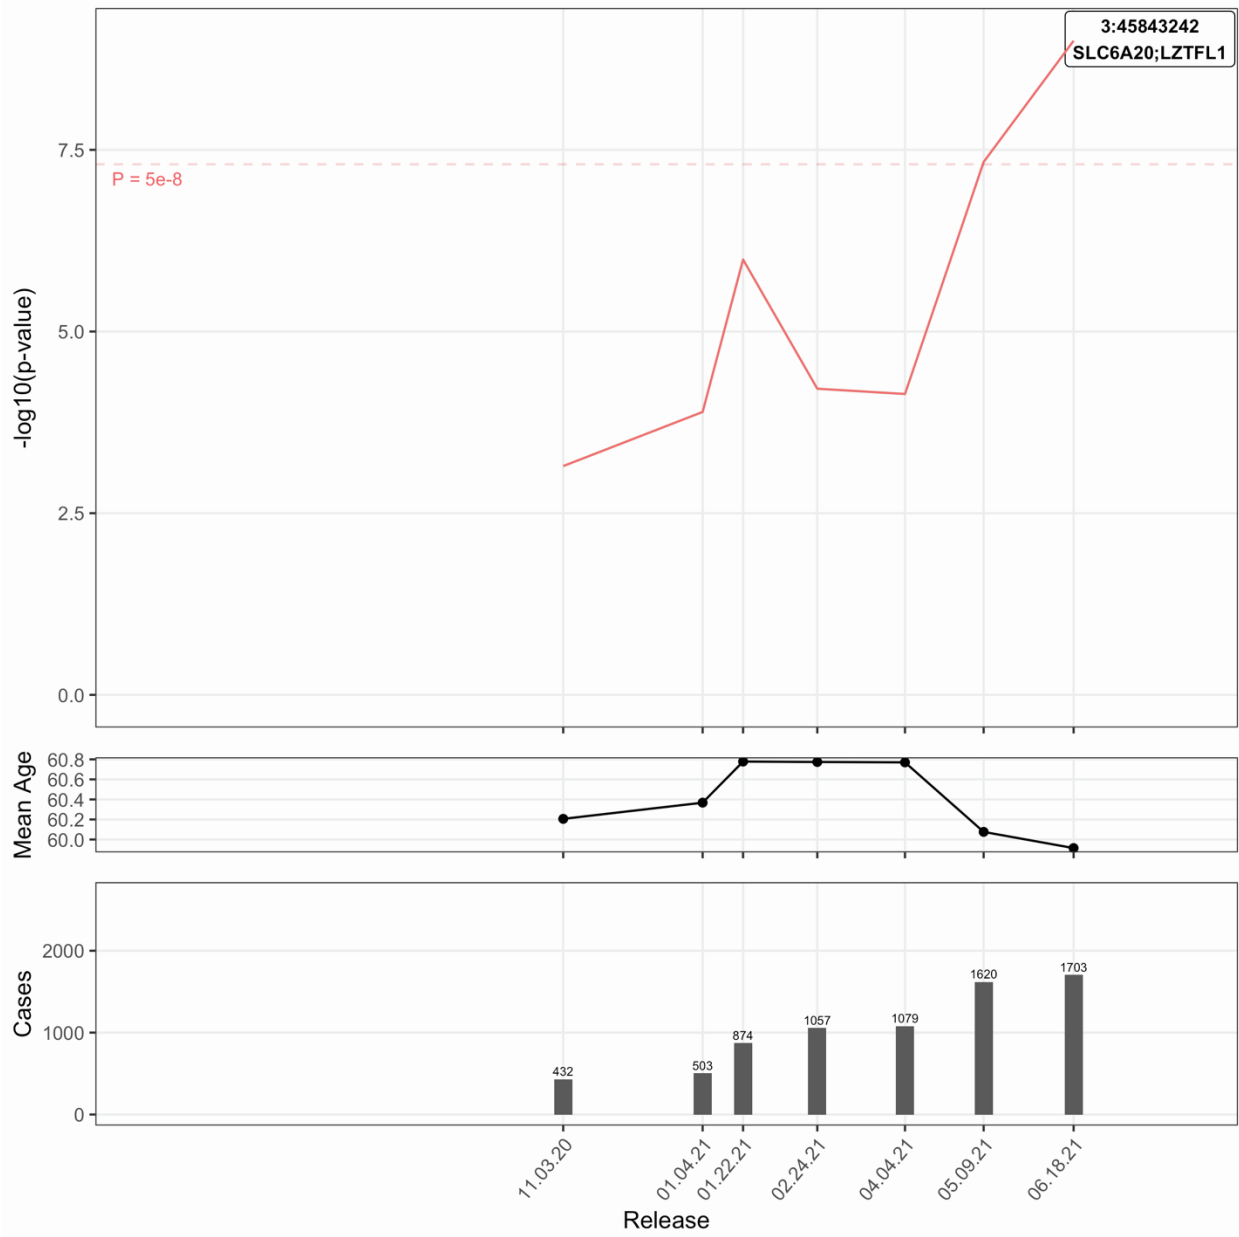

Figure S28: Covid-19 Hospitalization in EUR:Tested

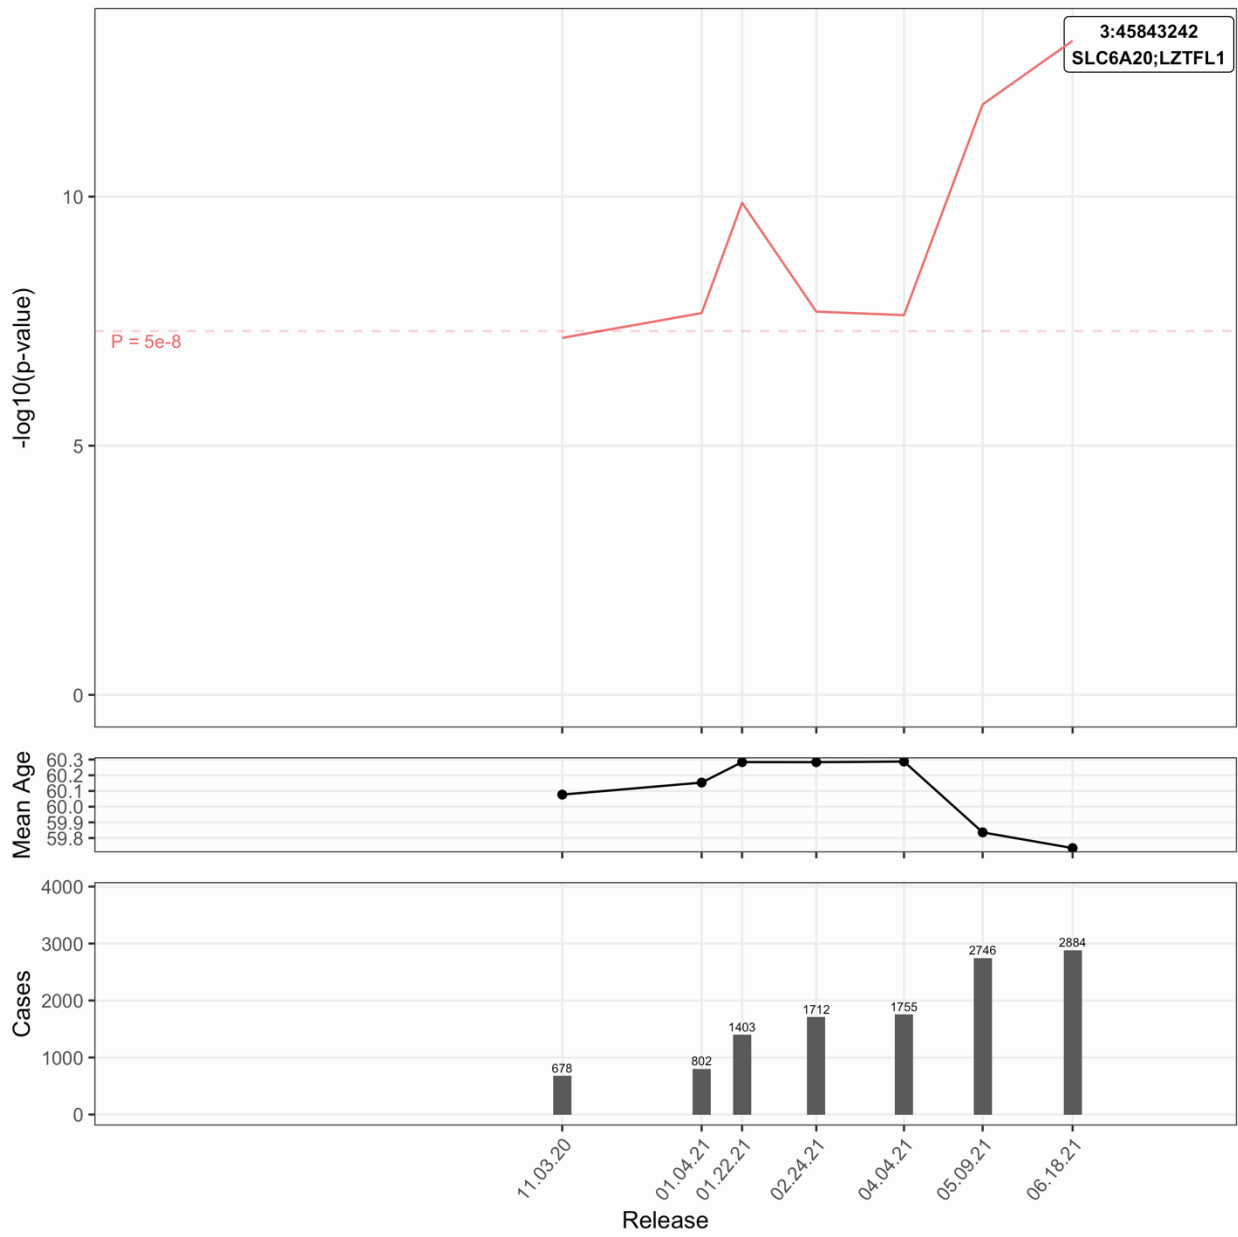

Figure S29: Covid-19 Hospitalization in EUR:Tested:M

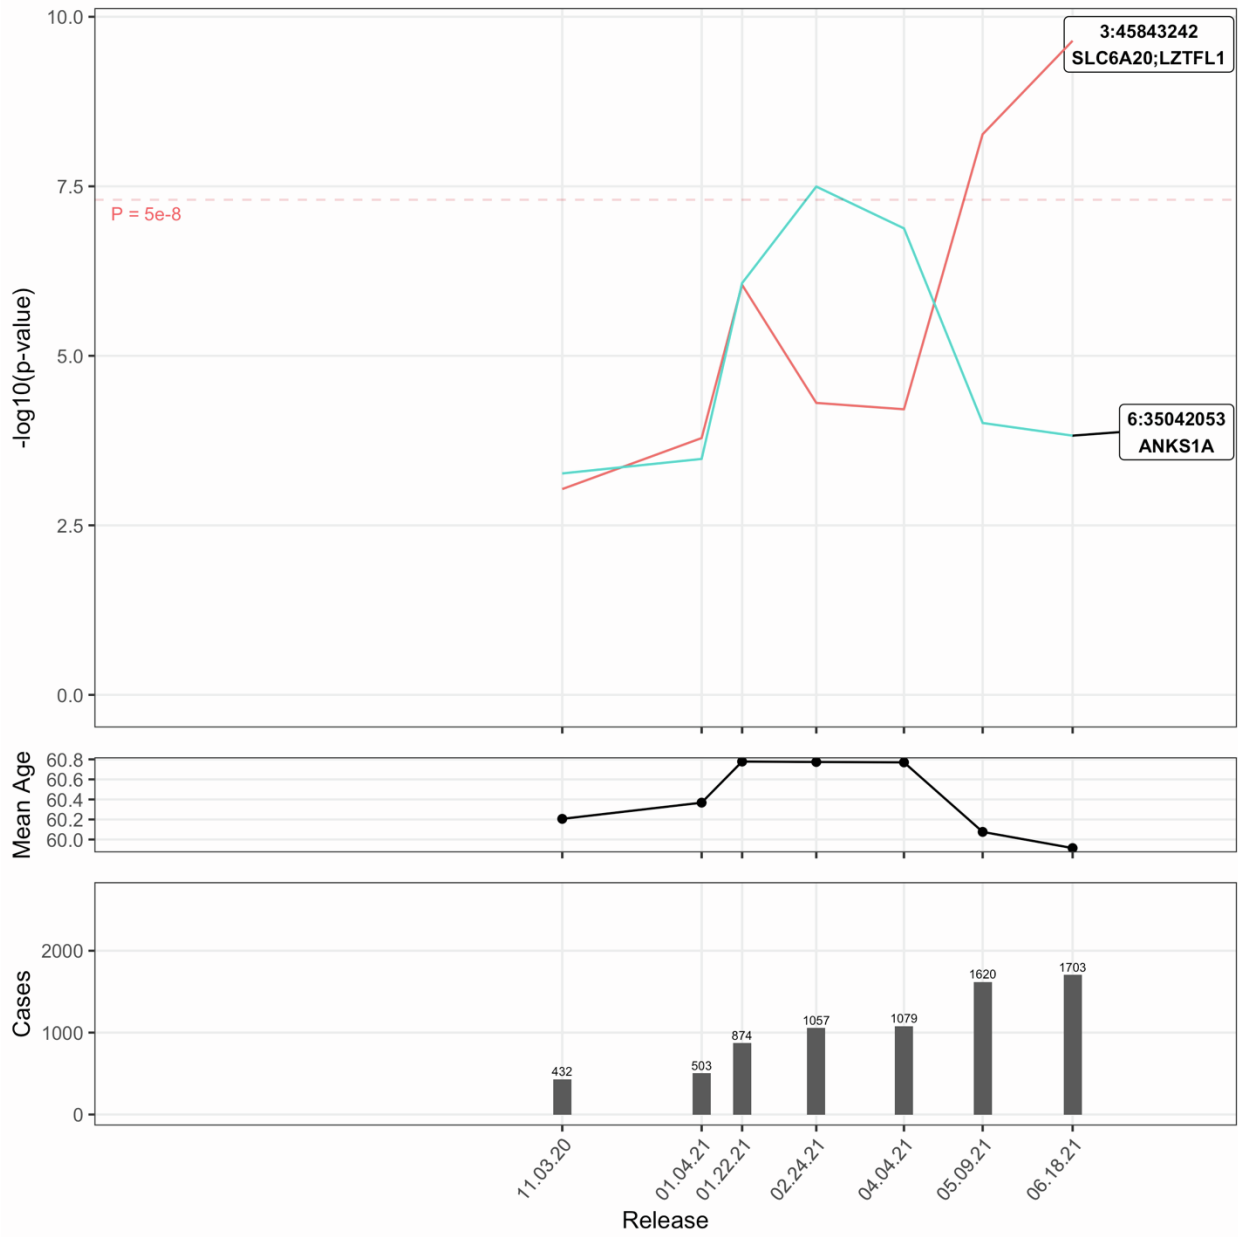

Figure S30: Covid-19 Hospitalization in EUR:Positive

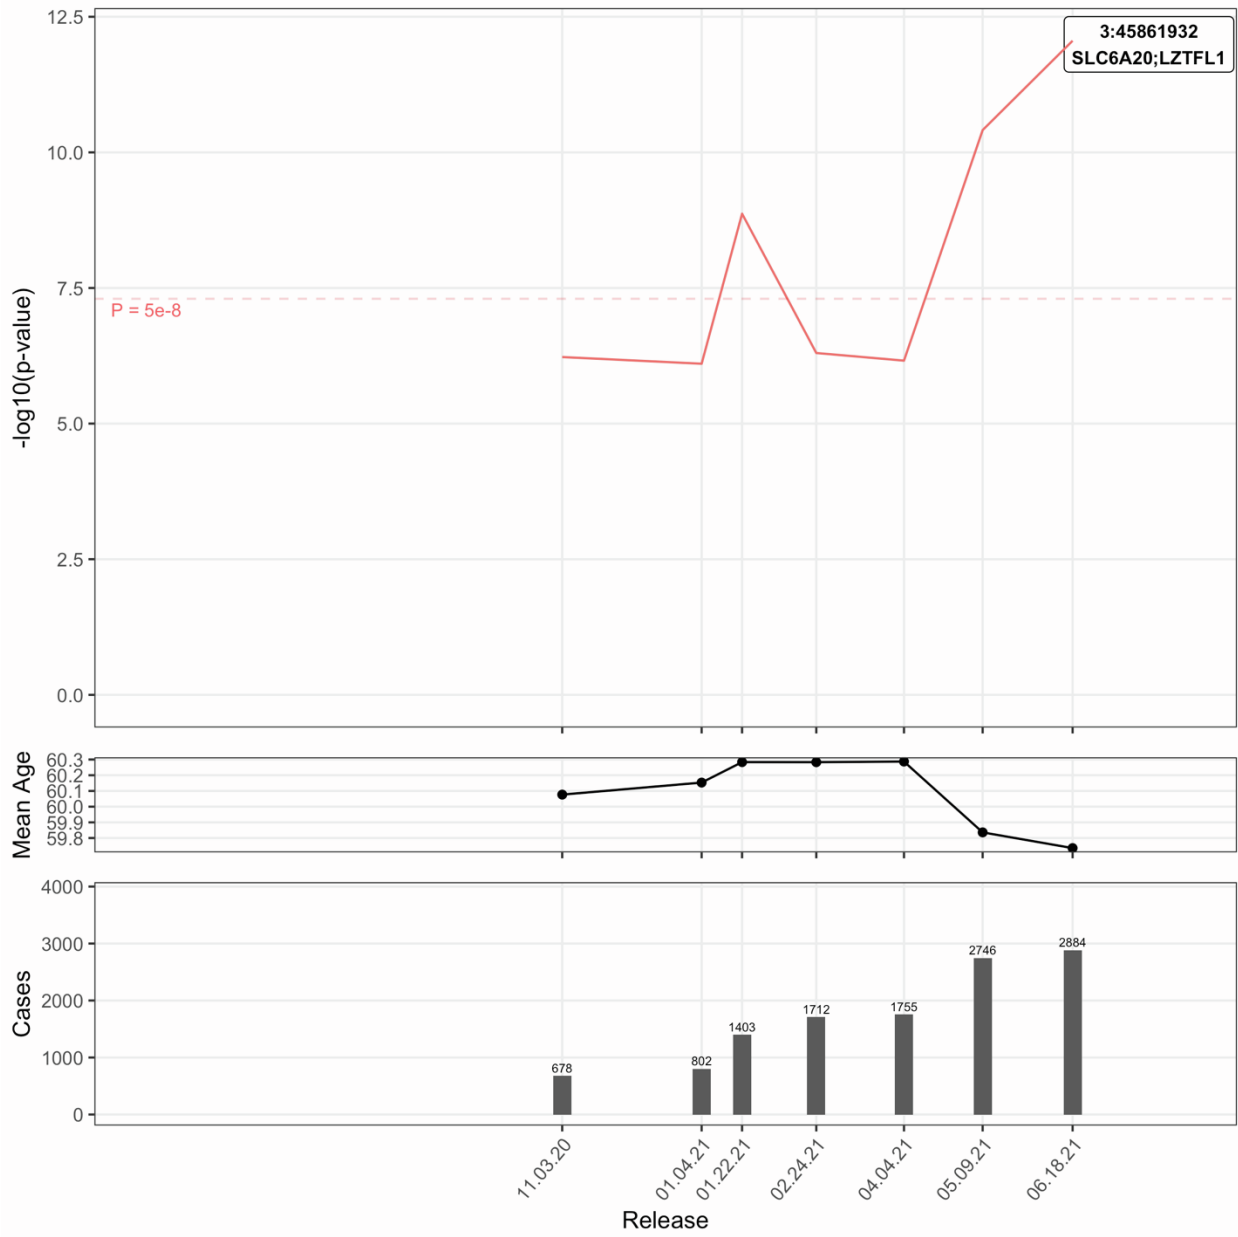



Figure S31: Covid-19 Hospitalization in EUR:Positive:F

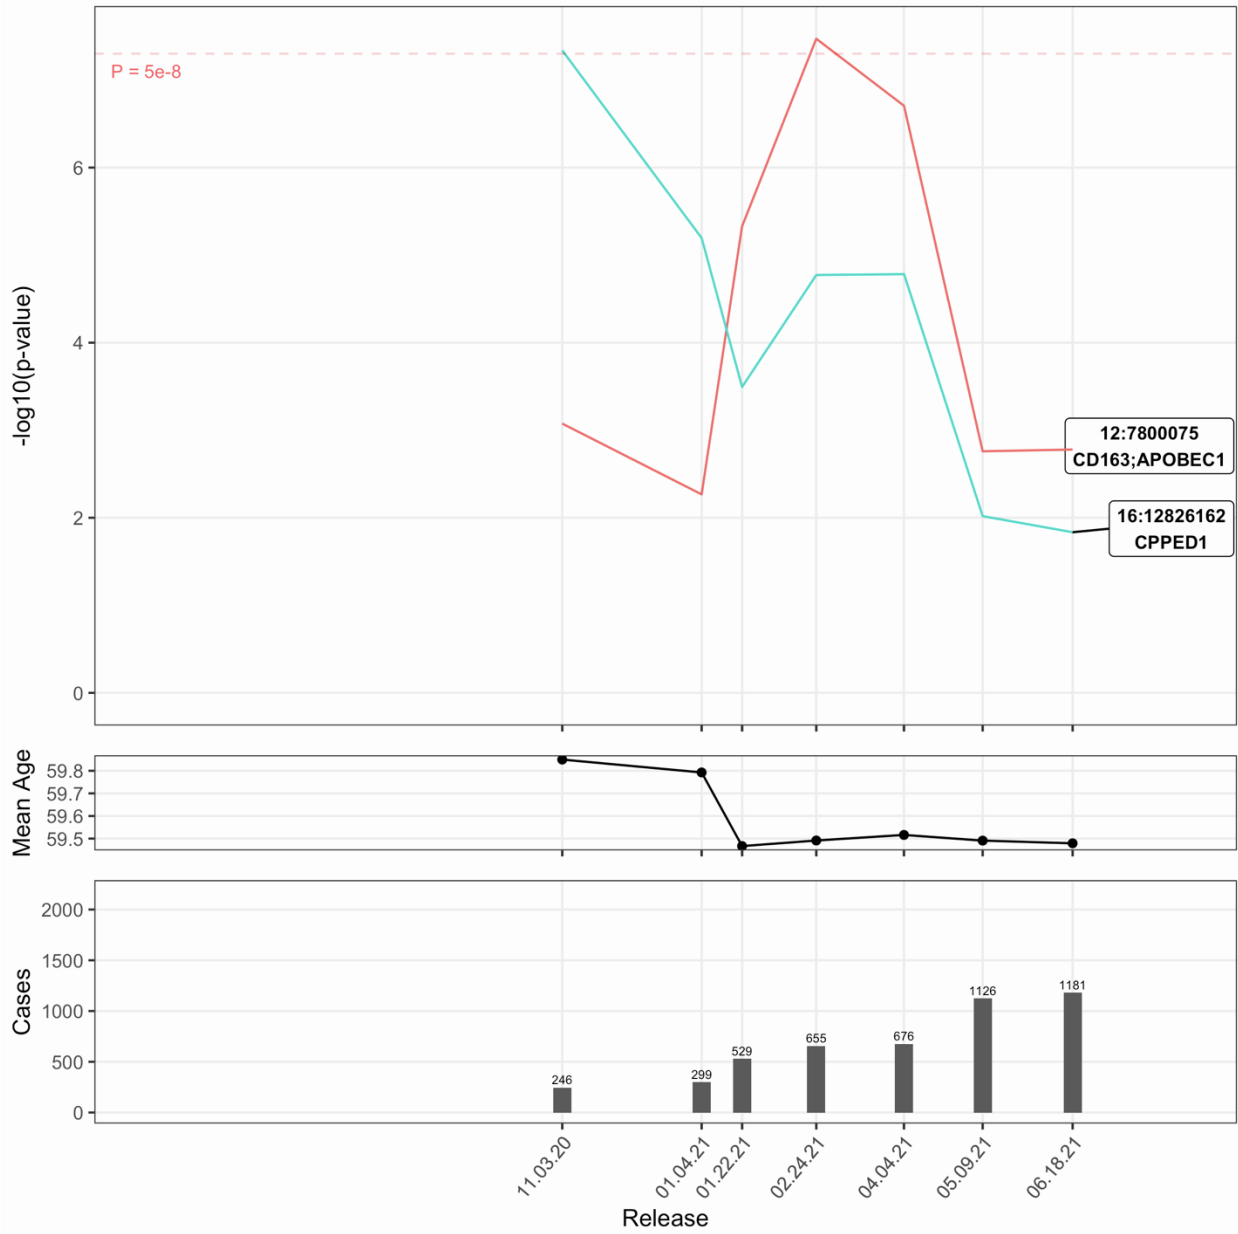

Figure S32: Covid-19 Hospitalization in EUR:Positive:M

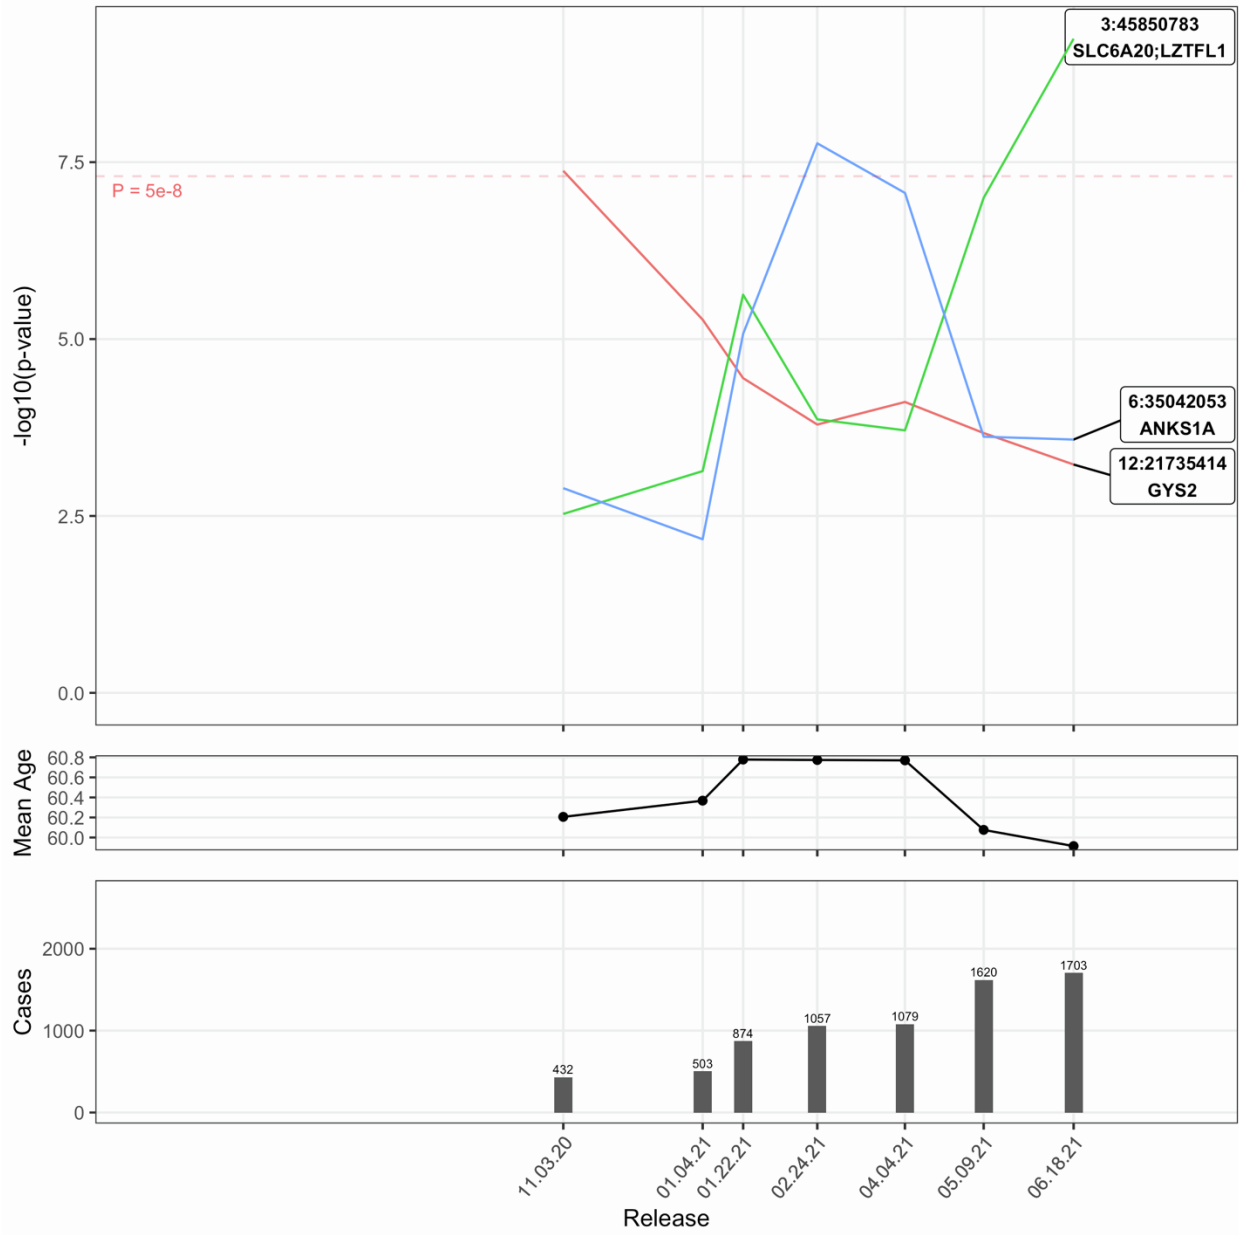

Figure S33: Severe Covid-19 in ALL:Pop

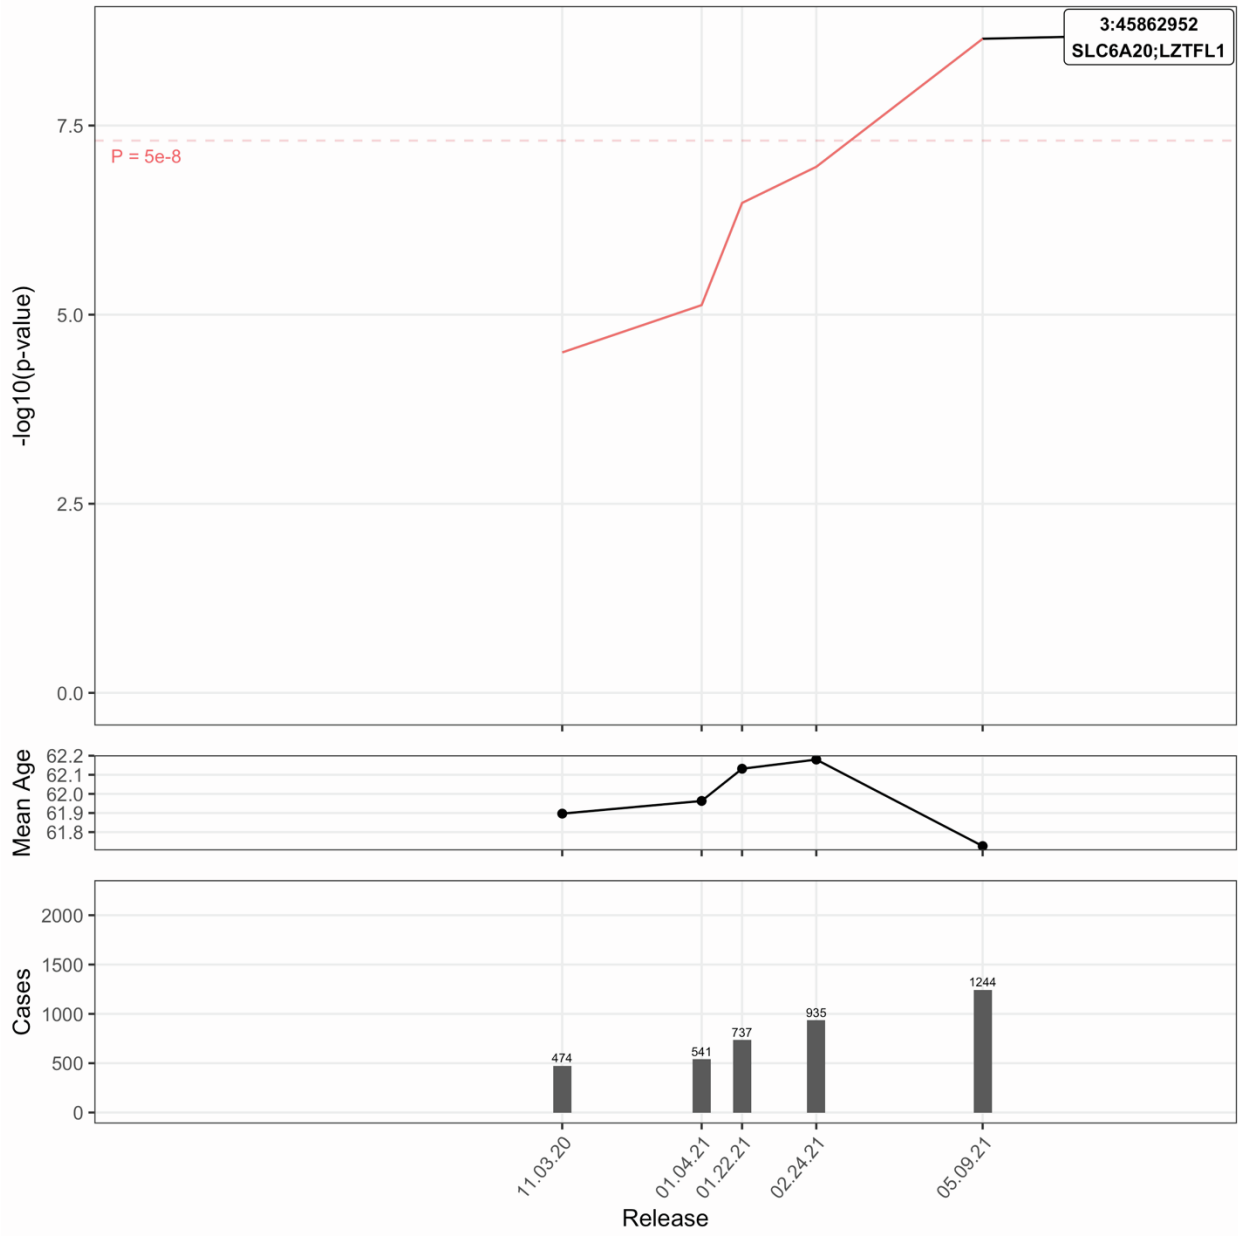

Figure S34: Severe Covid-19 in ALL:Pop:M

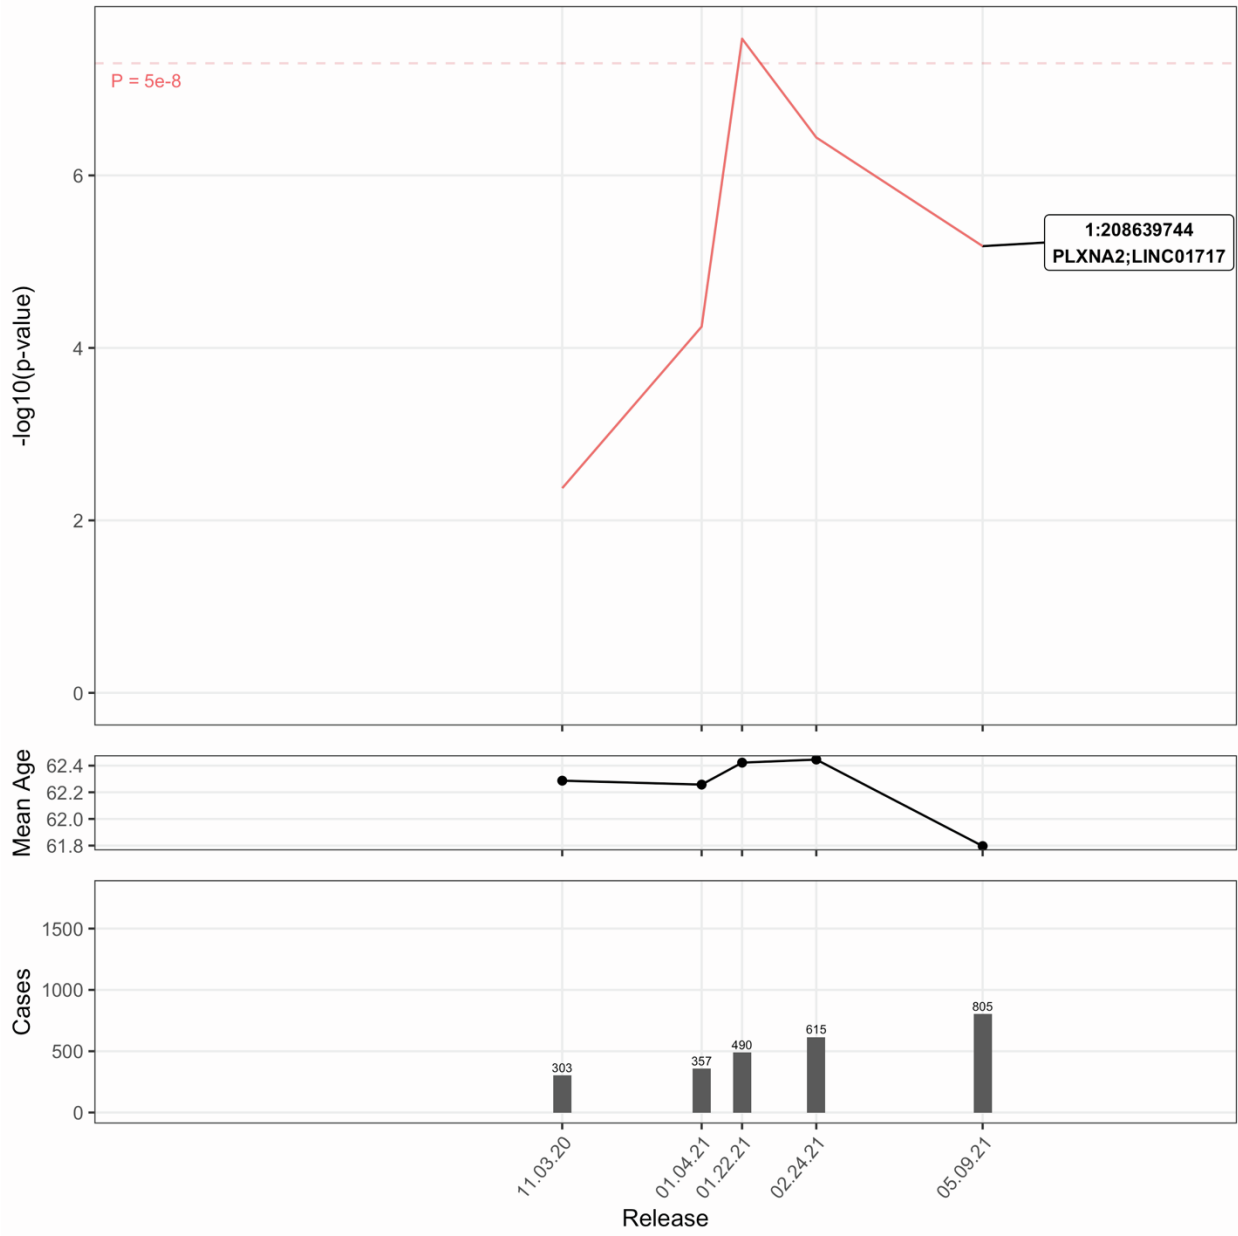

Figure S35: Severe Covid-19 in ALL:Tested

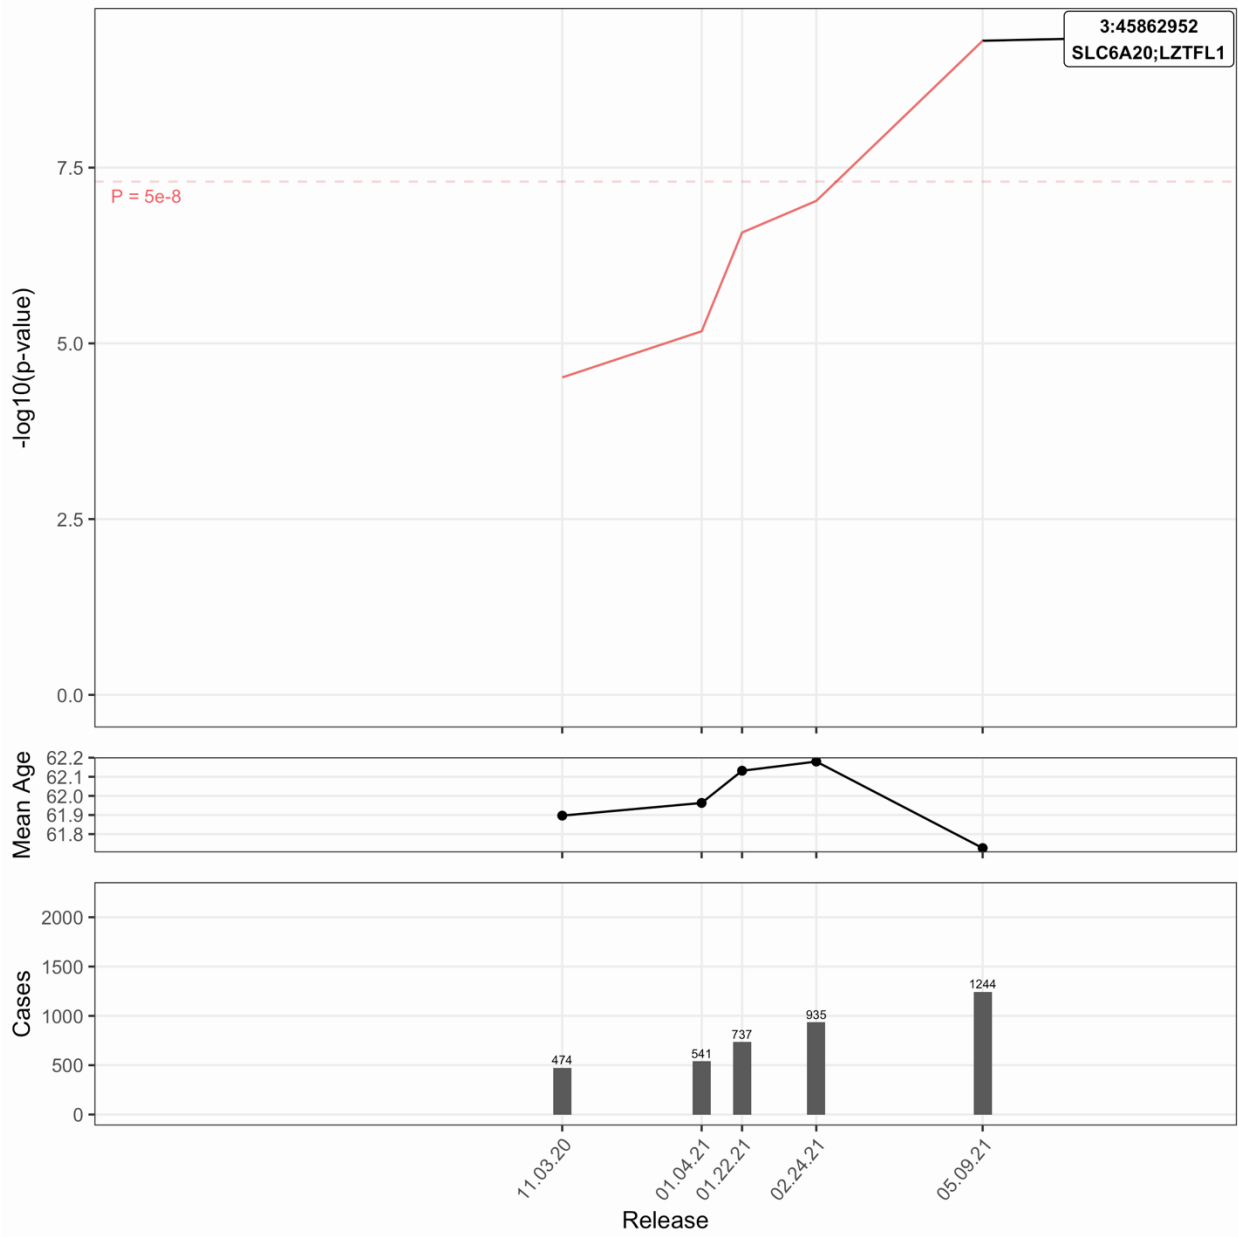

Figure S36: Severe Covid-19 in ALL:Tested:M

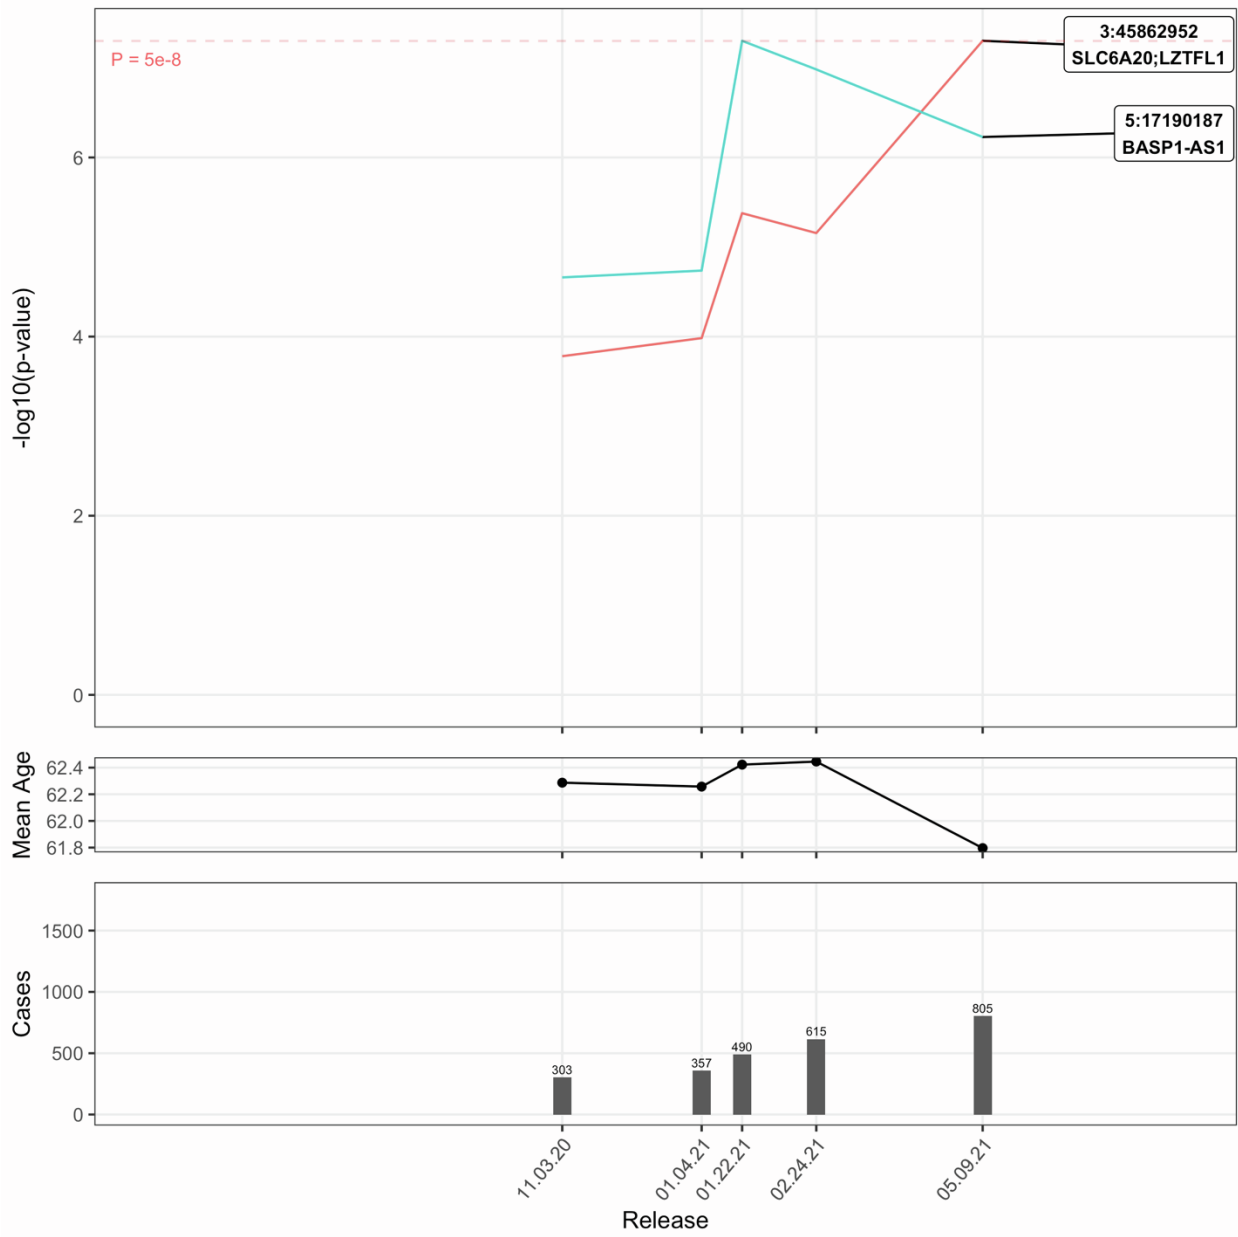

Figure S37: Severe Covid-19 in ALL:Positive

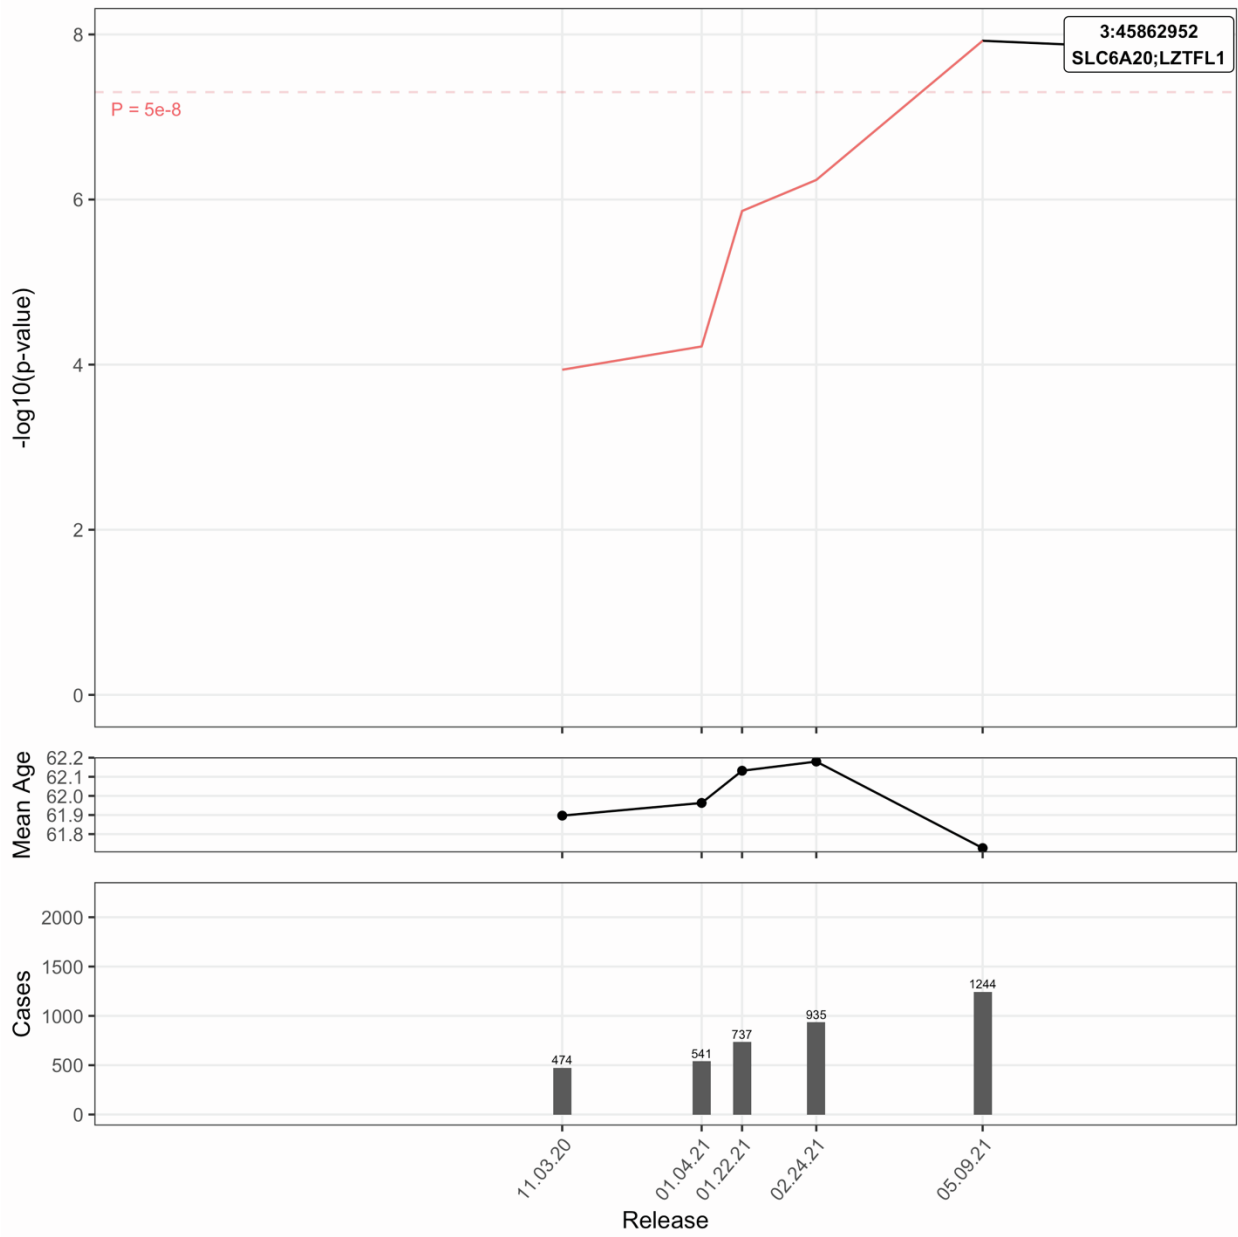

Figure S38: Severe Covid-19 in EUR:Pop

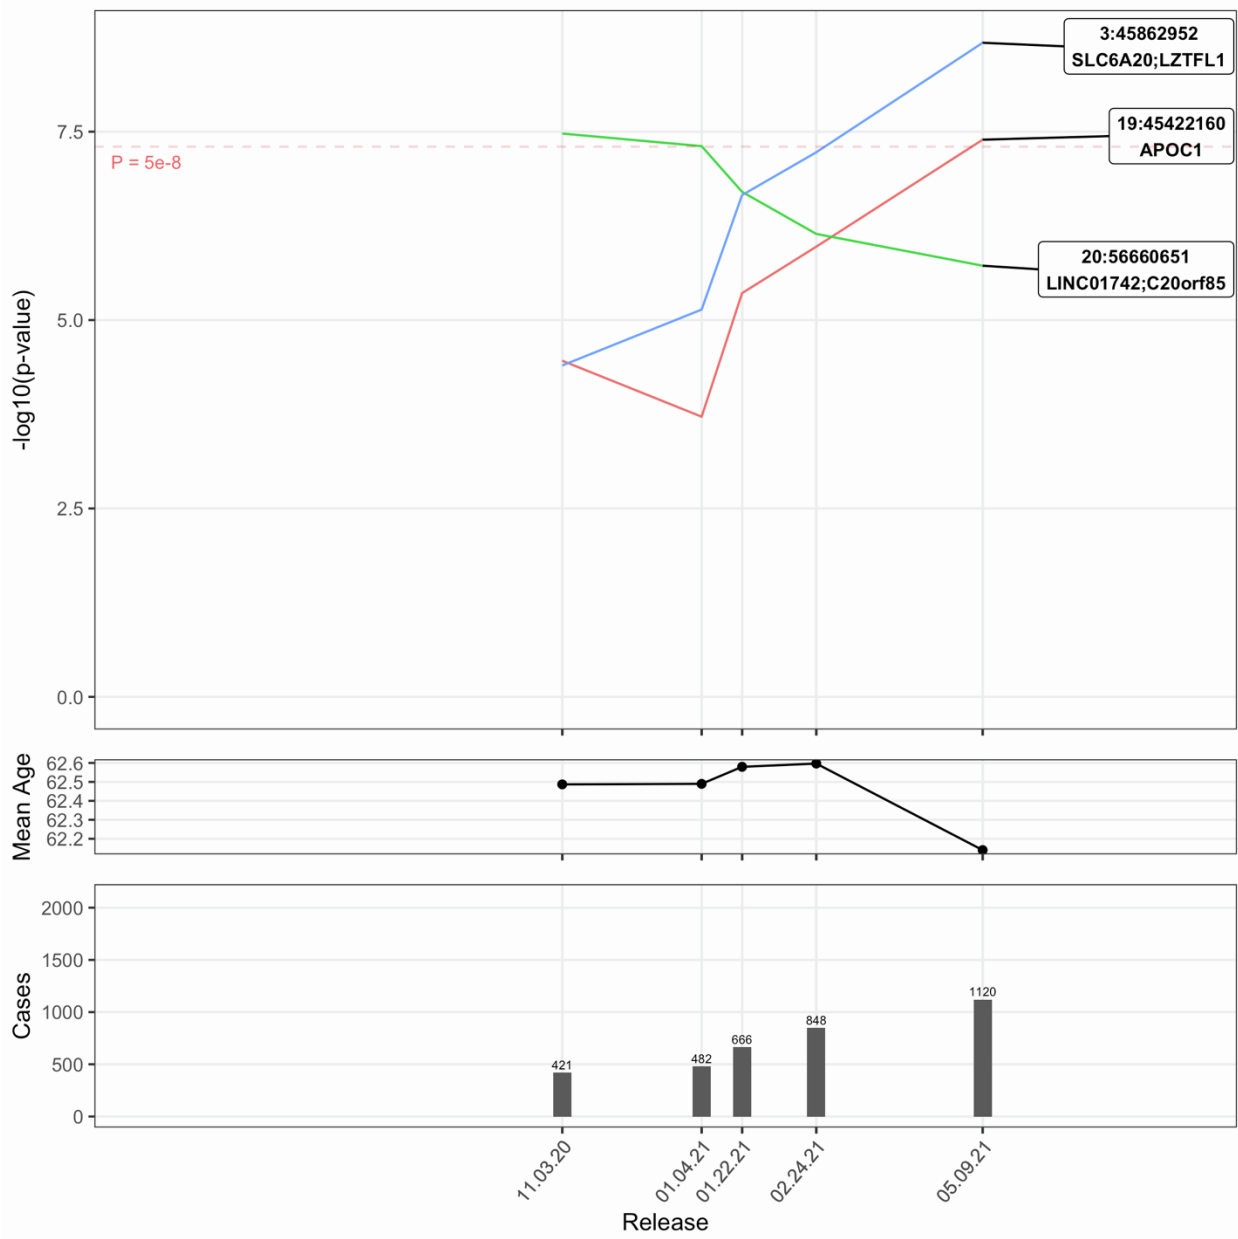



Figure S39: Severe Covid-19 in EUR:Pop:F

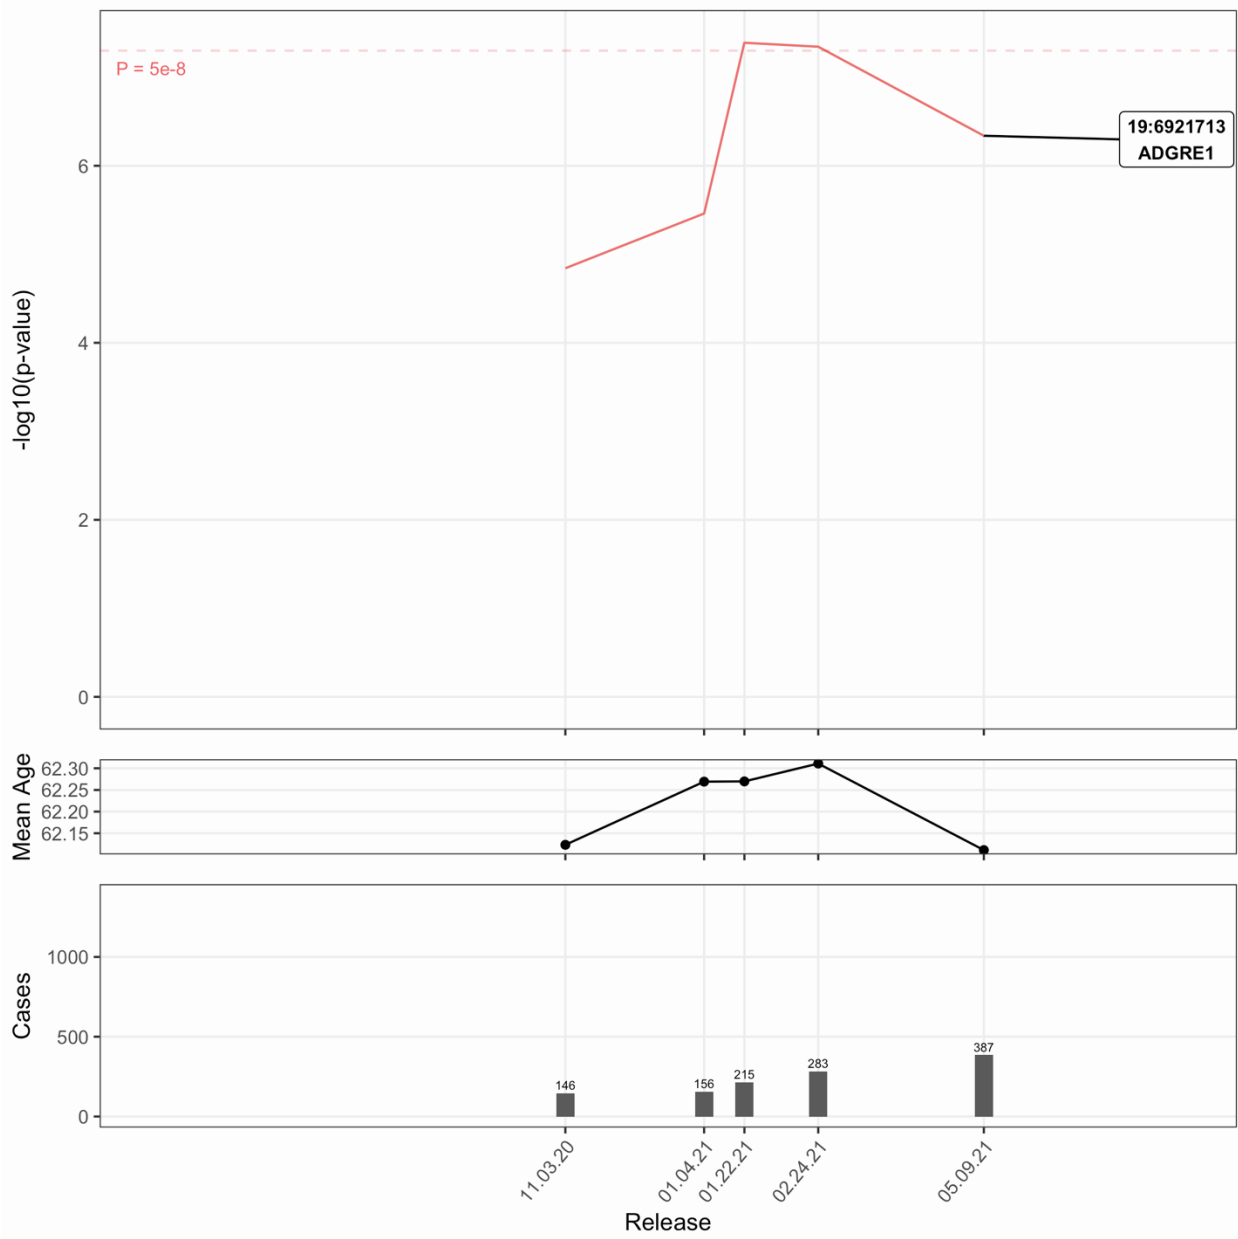

Figure S40: Severe Covid-19 in EUR:Tested

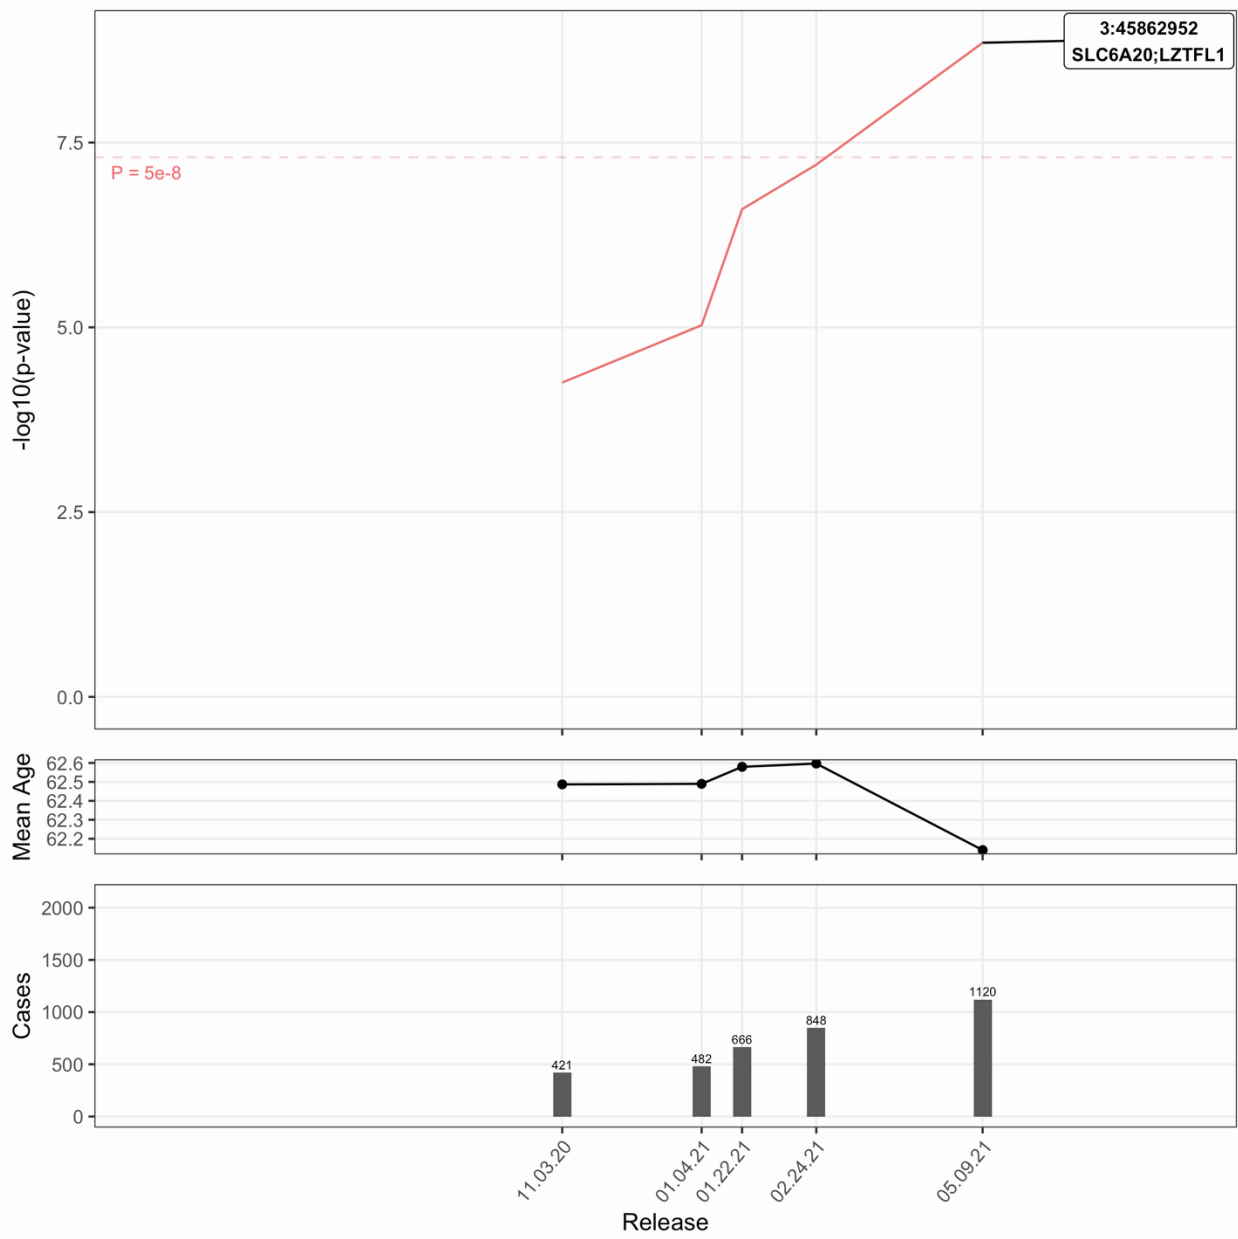

Figure S41: Severe Covid-19 in EUR:Tested:F

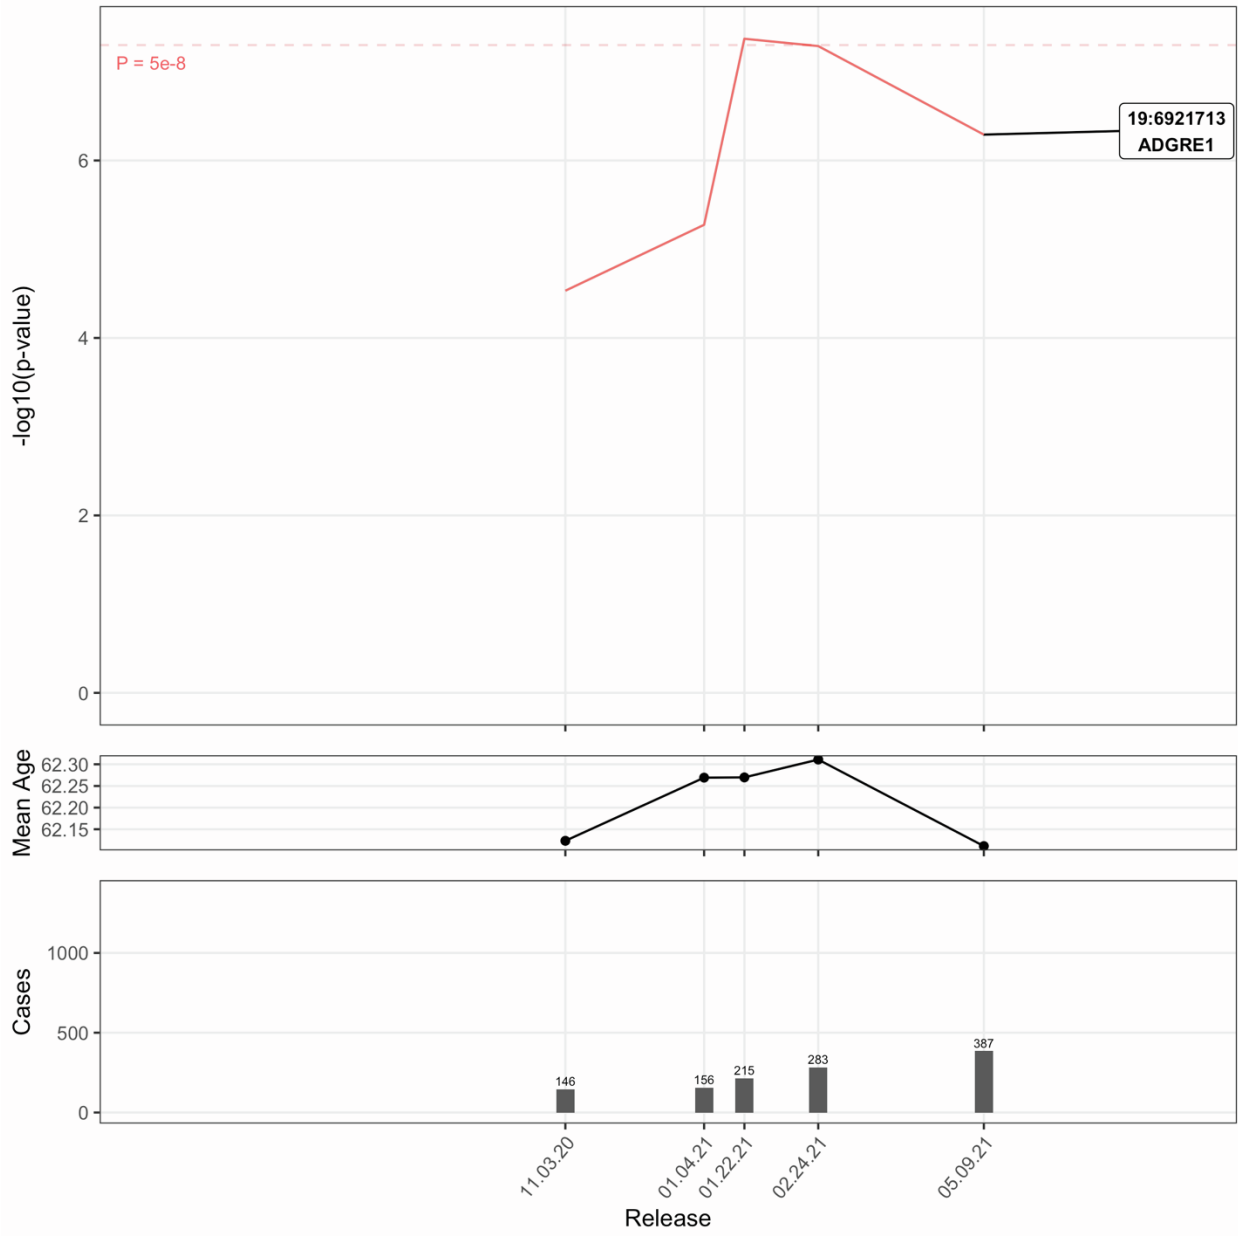

Figure S42: Severe Covid-19 in EUR:Positive

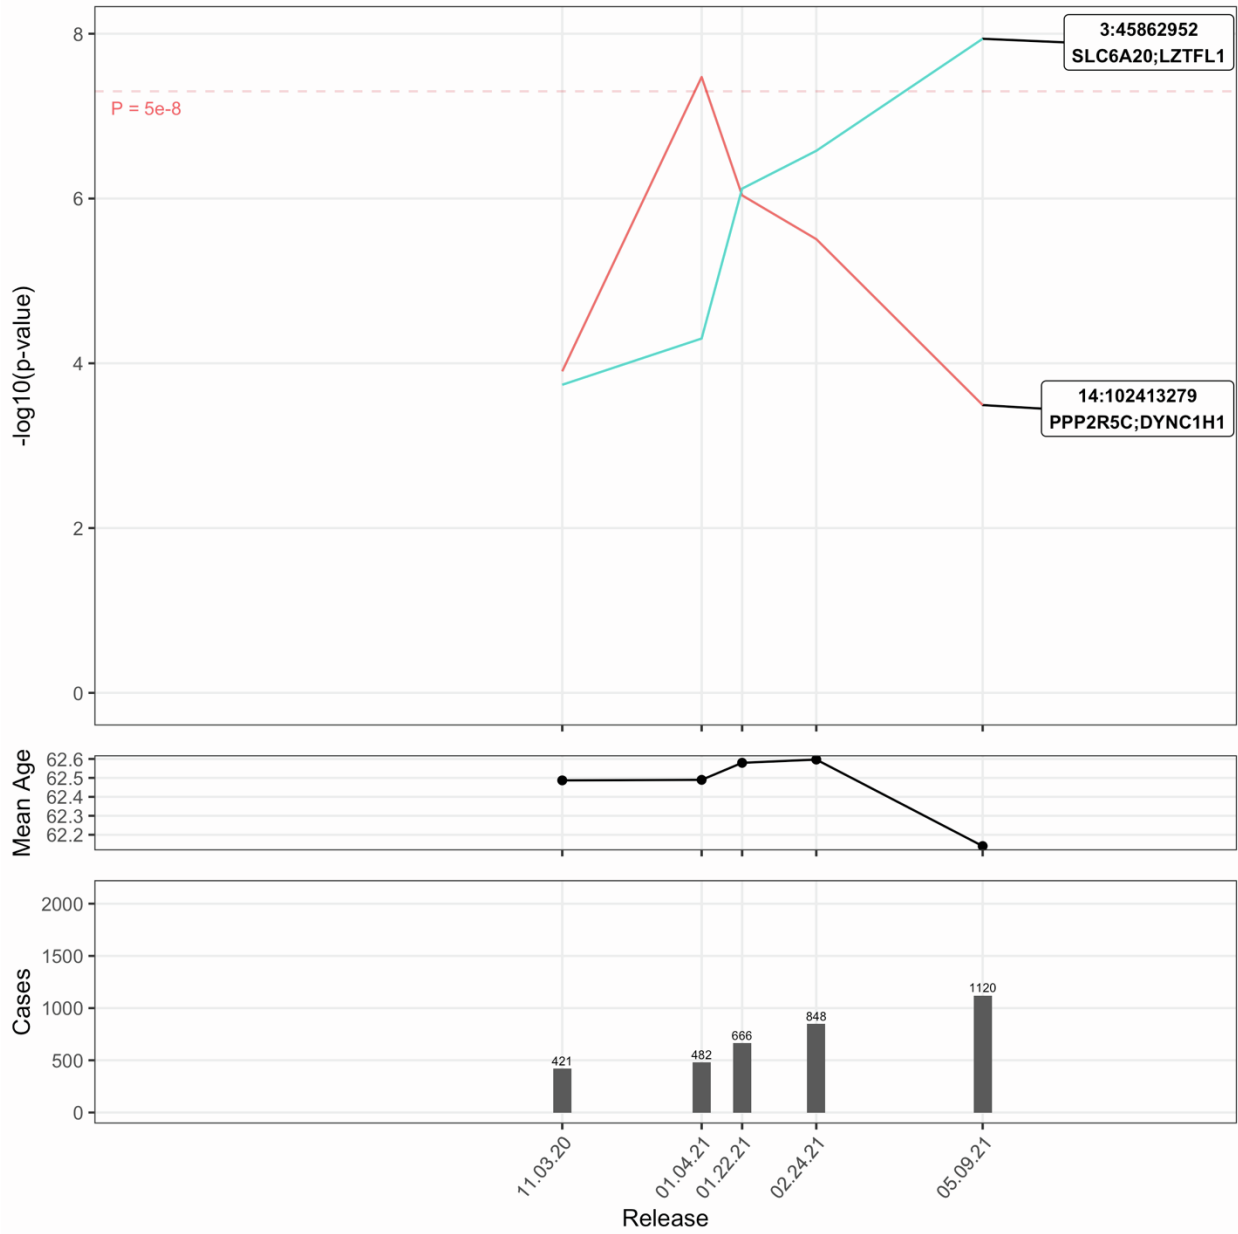

Figure S43: Severe Covid-19 in EUR:Positive:M

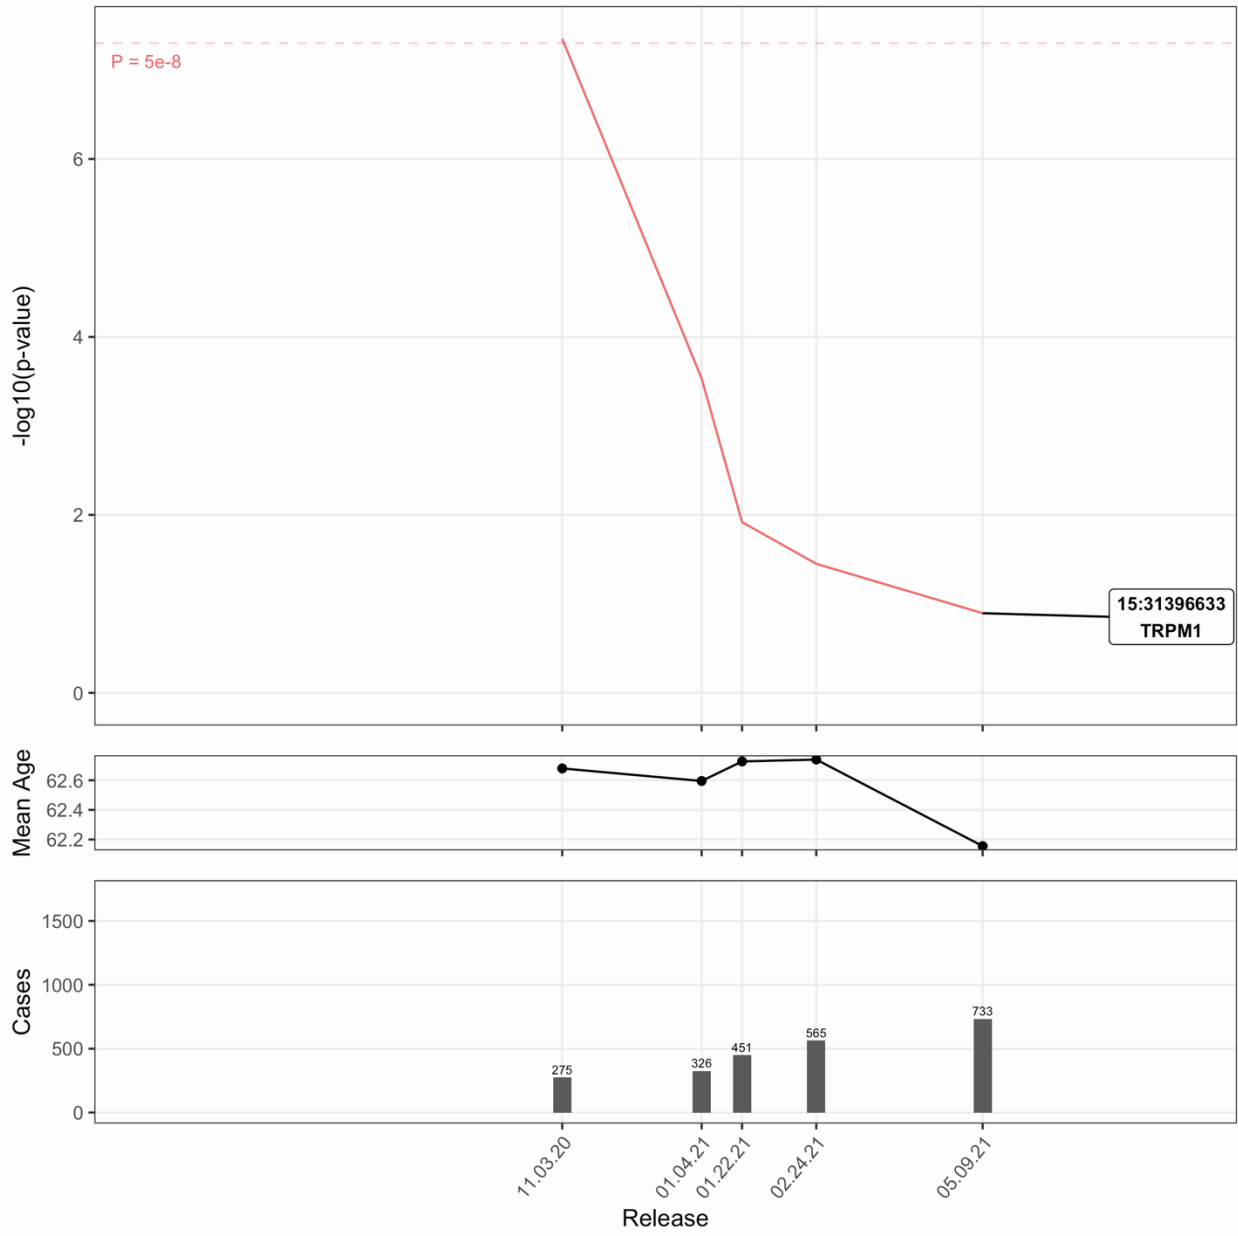

Figure S44: Covid-19 Death in ALL:Pop

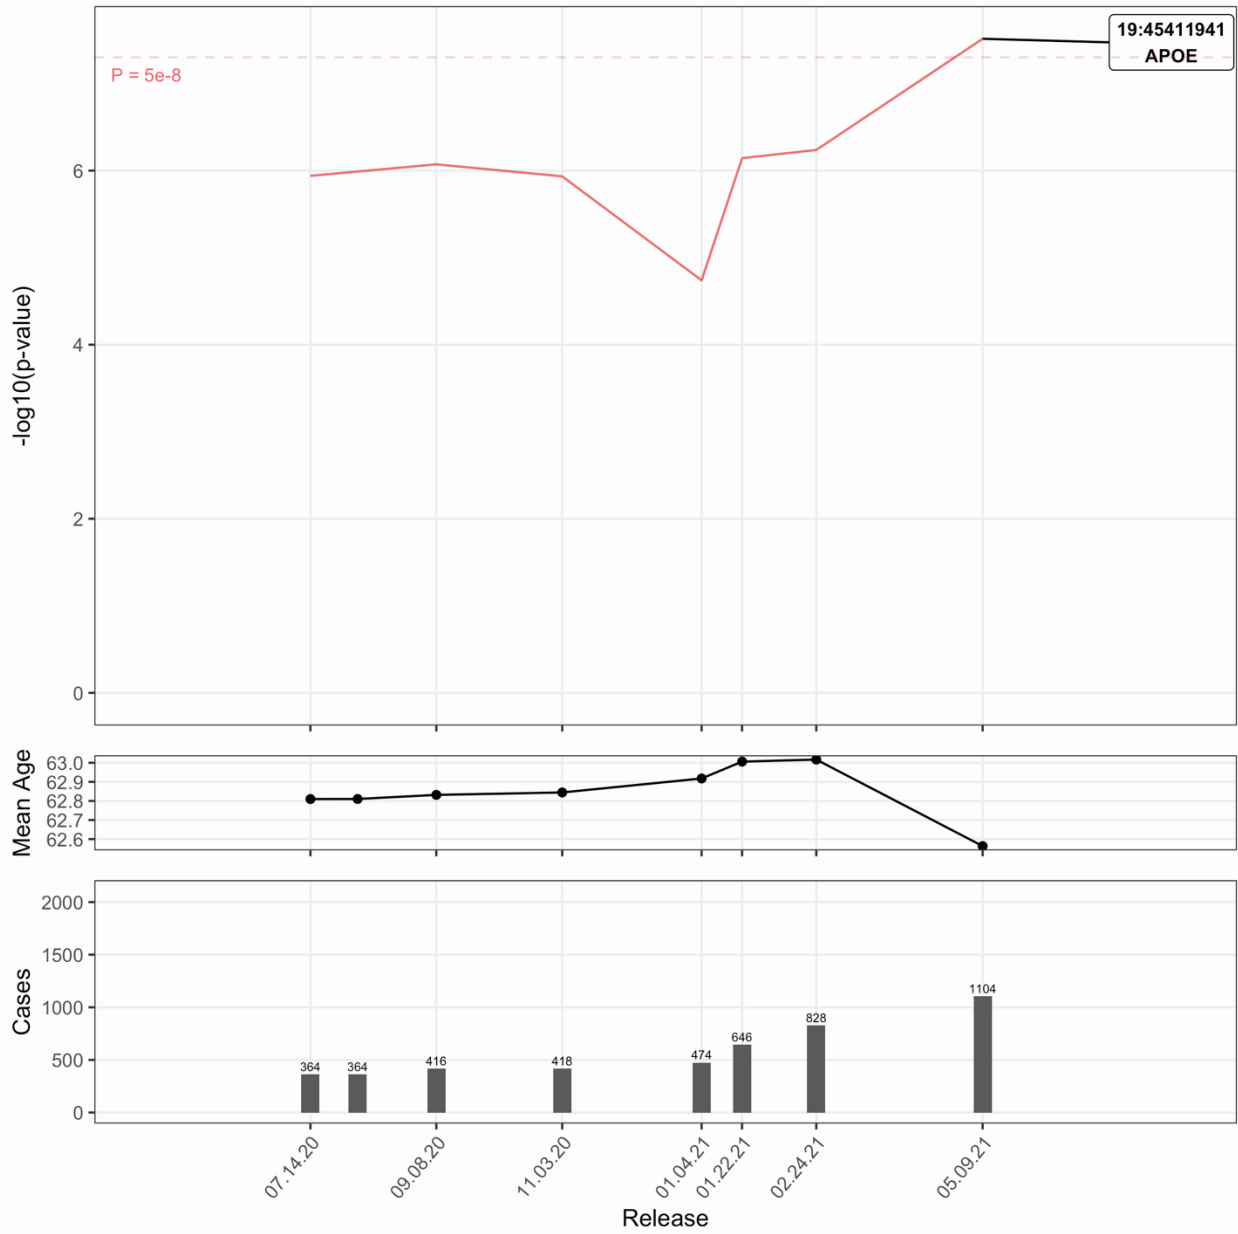

Figure S45: Covid-19 Death in ALL:Tested

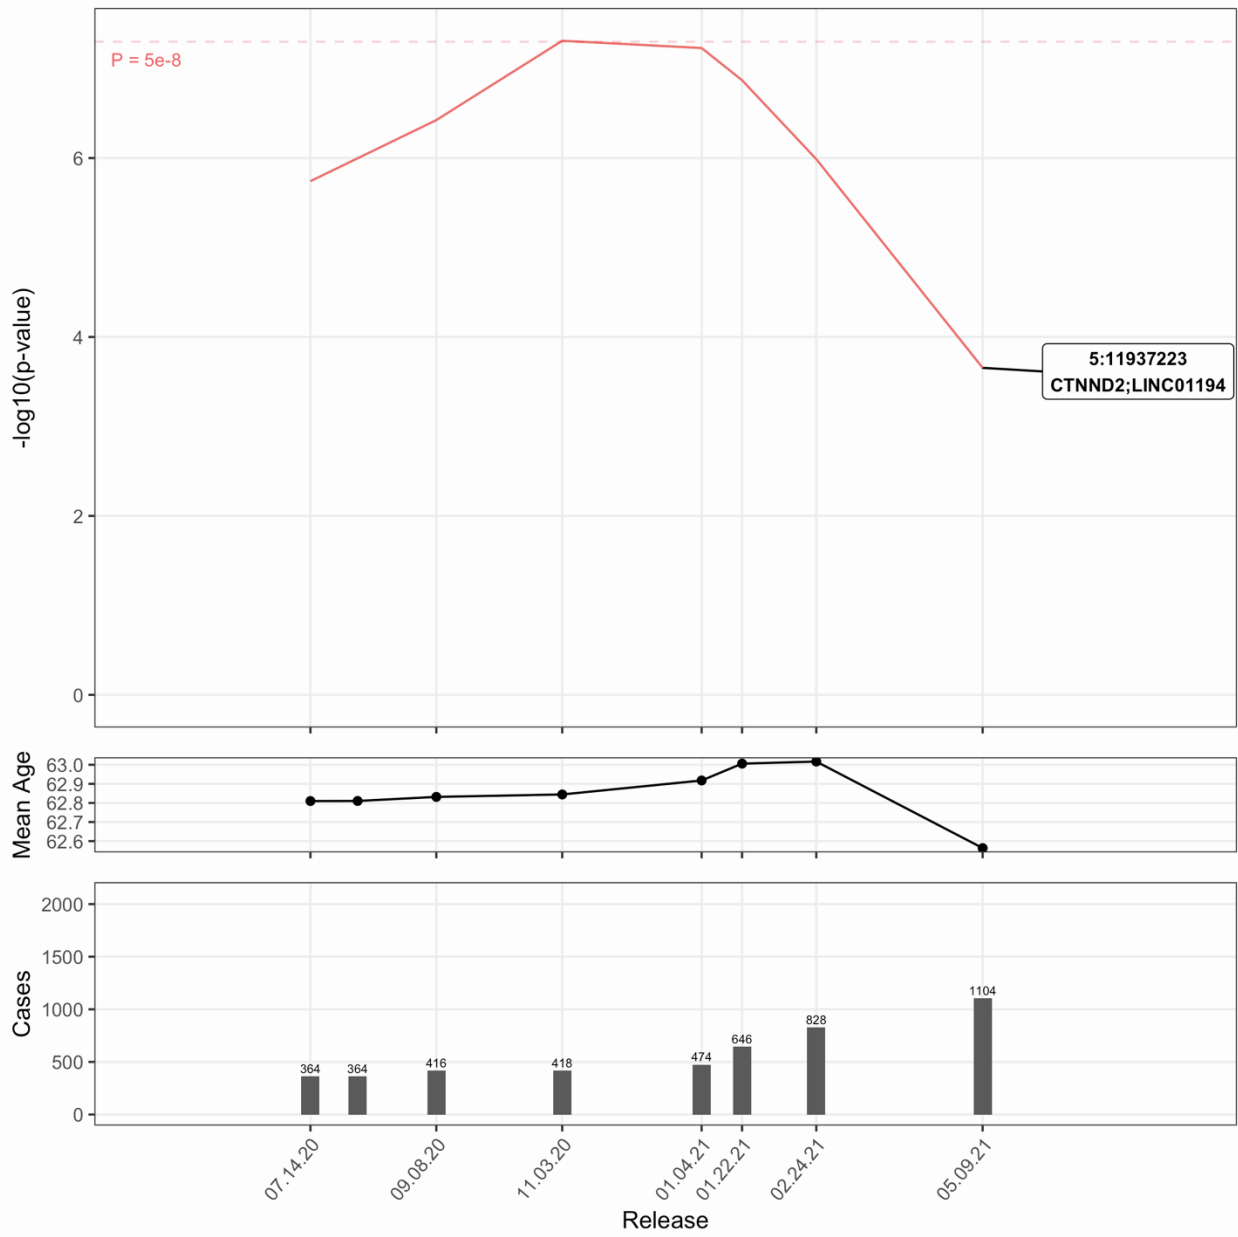

Figure S46: Covid-19 Death in EUR:Pop

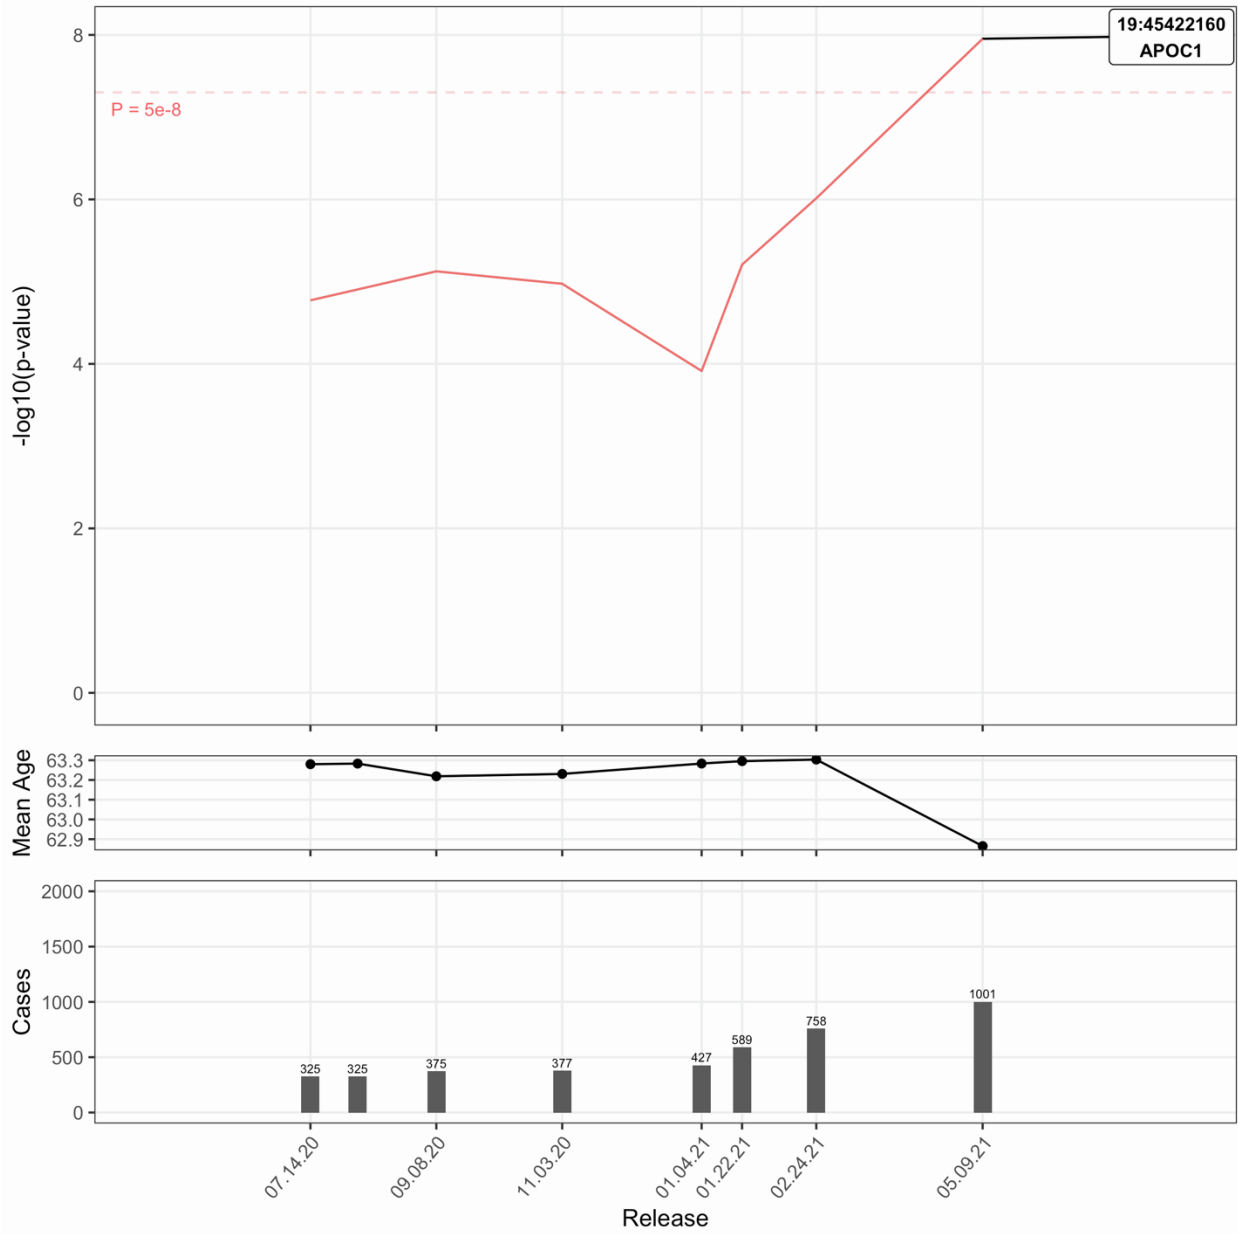



Figure S47: Covid-19 Death in EUR:Positive

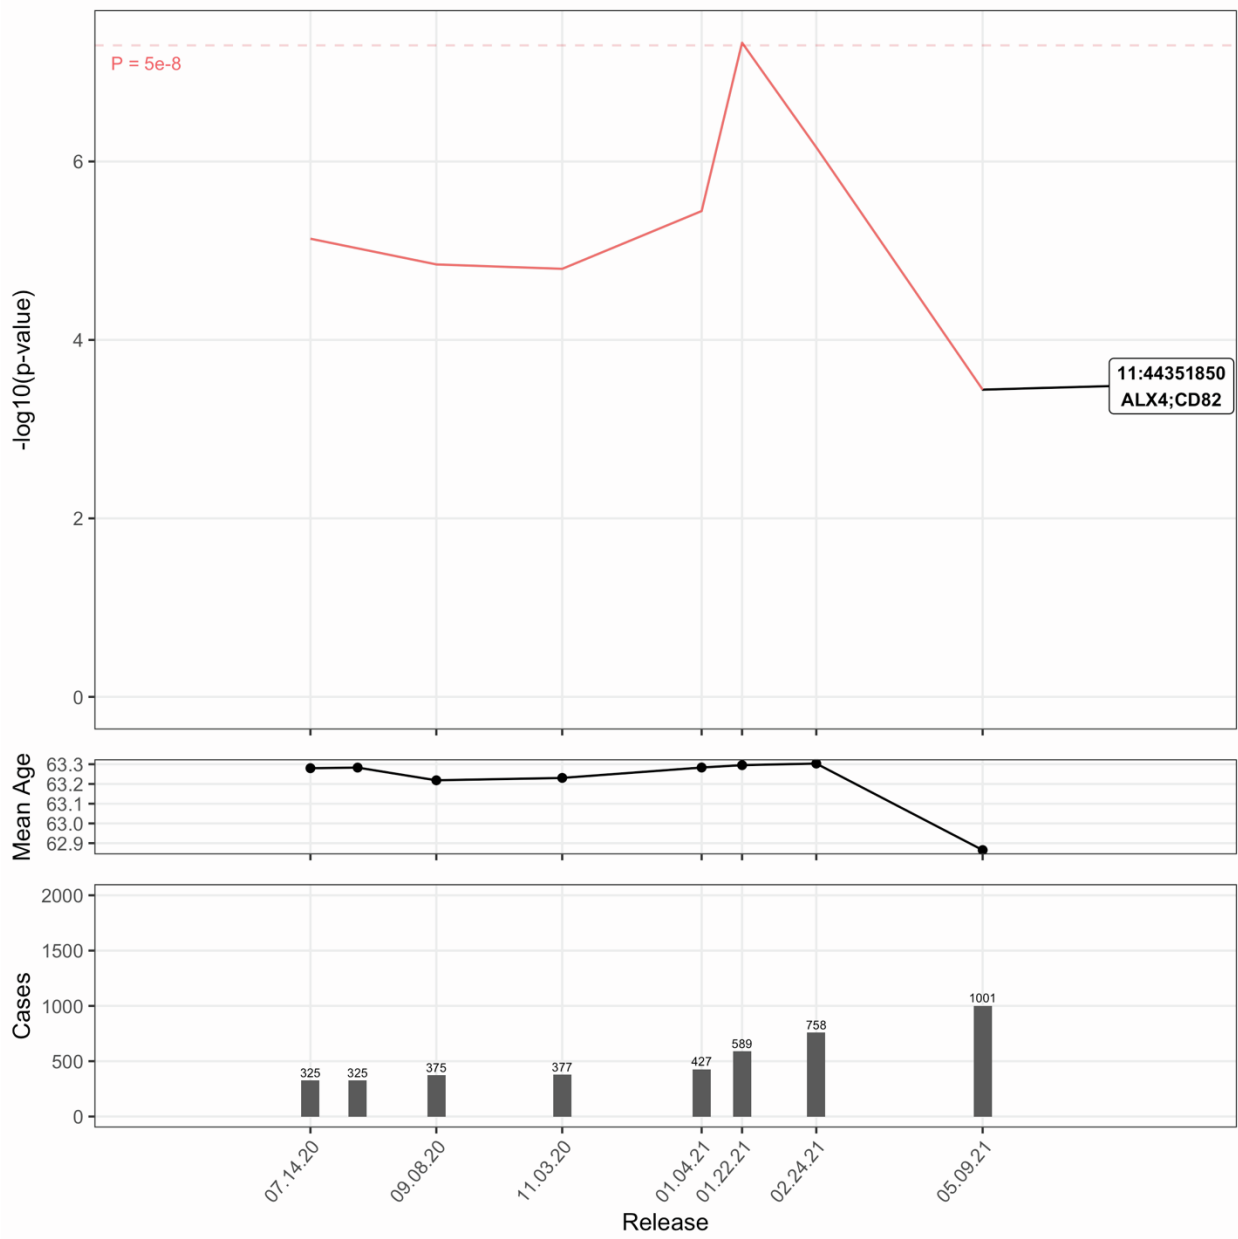

Figure S48: Comparison of genome-wide significant signals in analyses using Population and Tested controls

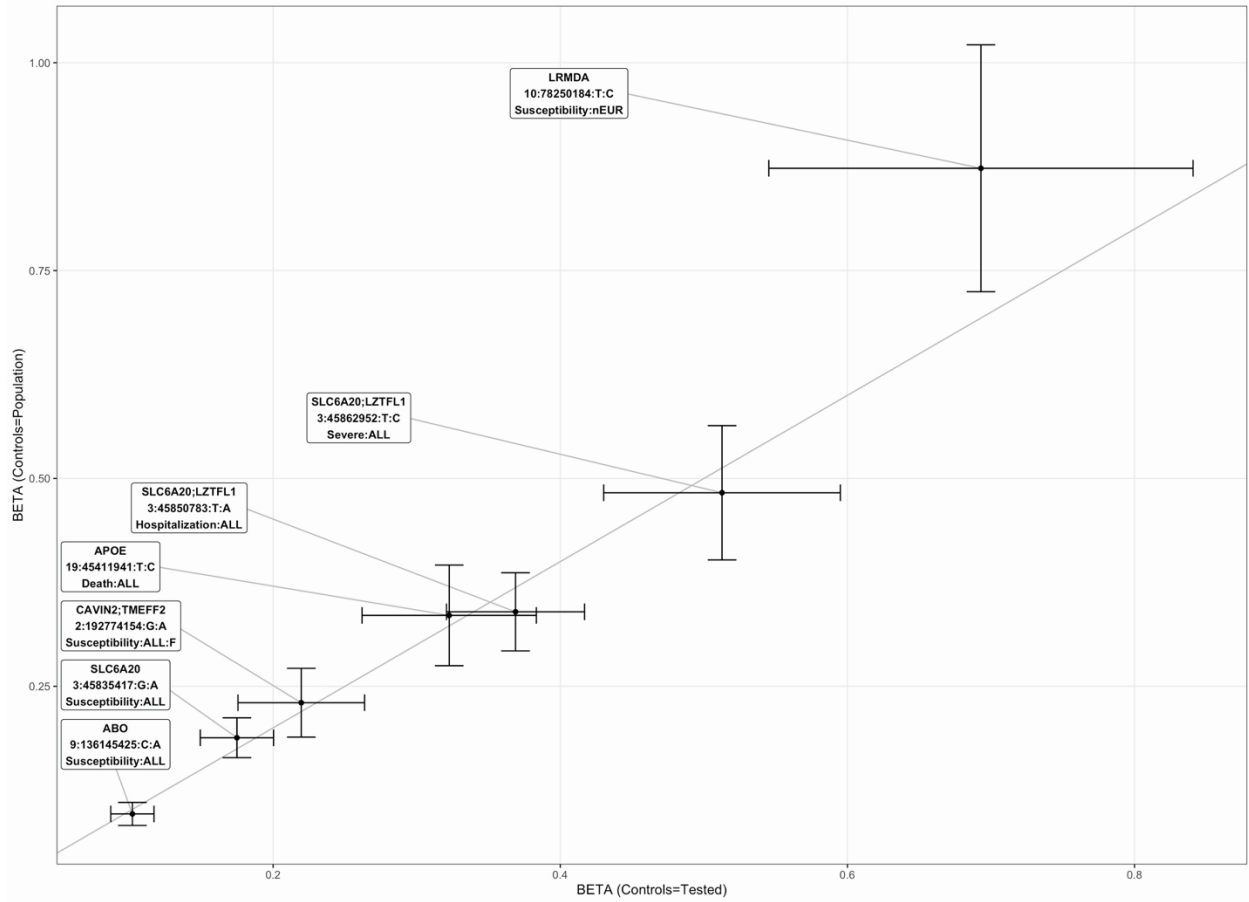

This figure presents the effect of each genome-wide significant signals and associated standard errors, when using the Population control set (on the Y-axis), or the Tested control set (on the X-axis).

Figure S49: Regional association plots of Covid-19 susceptibility and severity in Europeans (Population as controls), at the chr3p21.31 locus

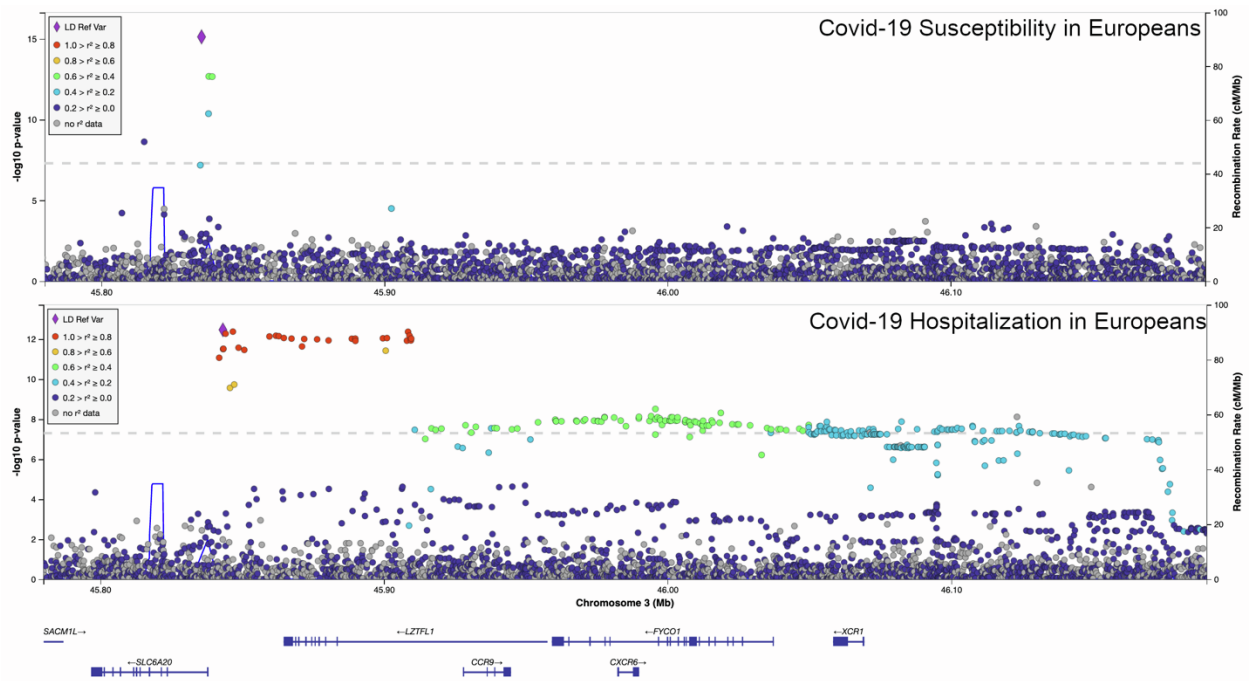

The top panel represent the Covid-19 susceptibility GWAS results in Europeans, at the chr3p21.31 locus, while the bottom panel represent the Covid-19 severity GWAS in Europeans at the same locus. The y-axis represents the  $-\log_{10}(\text{P-value})$ . The linkage disequilibrium between the lead SNP of both analyses (represented as a purple diamond) and each variant follows a color scheme presented on the left side of each panel.

Figure S50: Haplotype analysis of ABO blood groups, including the variant associated with Covid-19 susceptibility (from the LDlink tool LDhap)

|                                                |            |                   | Haplotypes and corresponding blood groups: |        |        |        |        |        |        |
|------------------------------------------------|------------|-------------------|--------------------------------------------|--------|--------|--------|--------|--------|--------|
|                                                | RS Number  | Position (GRCh37) | Allele Frequencies                         | O1     | A1     | A2     | B      | O2     | B      |
| Variant tagging for O2 group :                 | rs41302905 | chr9:136131316    | C=0.971, T=0.029                           | C      | C      | C      | C      | T      | C      |
| Variant tagging for B group :                  | rs8176743  | chr9:136131415    | C=0.915, T=0.085                           | C      | C      | C      | T      | C      | T      |
| Variant tagging for A2 group :                 | rs1053878  | chr9:136131651    | G=0.901, A=0.099                           | G      | G      | A      | G      | G      | G      |
| Variant tagging for O1 group :                 | rs8176719  | chr9:136132908    | -=0.605, C=0.395                           | -      | C      | C      | C      | C      | C      |
| Variant tagging for A1 group :                 | rs2519093  | chr9:136141870    | C=0.815, T=0.185                           | C      | T      | C      | C      | C      | C      |
| Variant associated with Covid susceptibility : | rs9411378  | chr9:136145425    | C=0.701, A=0.299                           | C      | A      | A      | C      | C      | A      |
| <b>Haplotype Count</b>                         |            |                   |                                            | 603    | 183    | 94     | 68     | 29     | 17     |
| <b>Haplotype Frequency</b>                     |            |                   |                                            | 0.5994 | 0.1819 | 0.0934 | 0.0676 | 0.0288 | 0.0169 |

The 5 SNPs tagging for the 5 most common blood groups, as well as the variant associated with Covid-19 susceptibility were included in this analysis. This analysis relies on the 1000 genome dataset. The resulting haplotypes, and corresponding blood groups (tagged by their associated variants) observed in this population are indicated on the right. The bottom part indicates the frequency of each haplotype observed. All A1 and A2 haplotypes contain the Covid-19 variant. Out of the 85 B haplotypes present in this population, 17 (20%) also contain the Covid-19 variant.

Figure S51: Evolution of the signals from Figure 1 (Susceptibility signals in EUR:Pop, from UKB) in Covid-19hgi C2 analyses

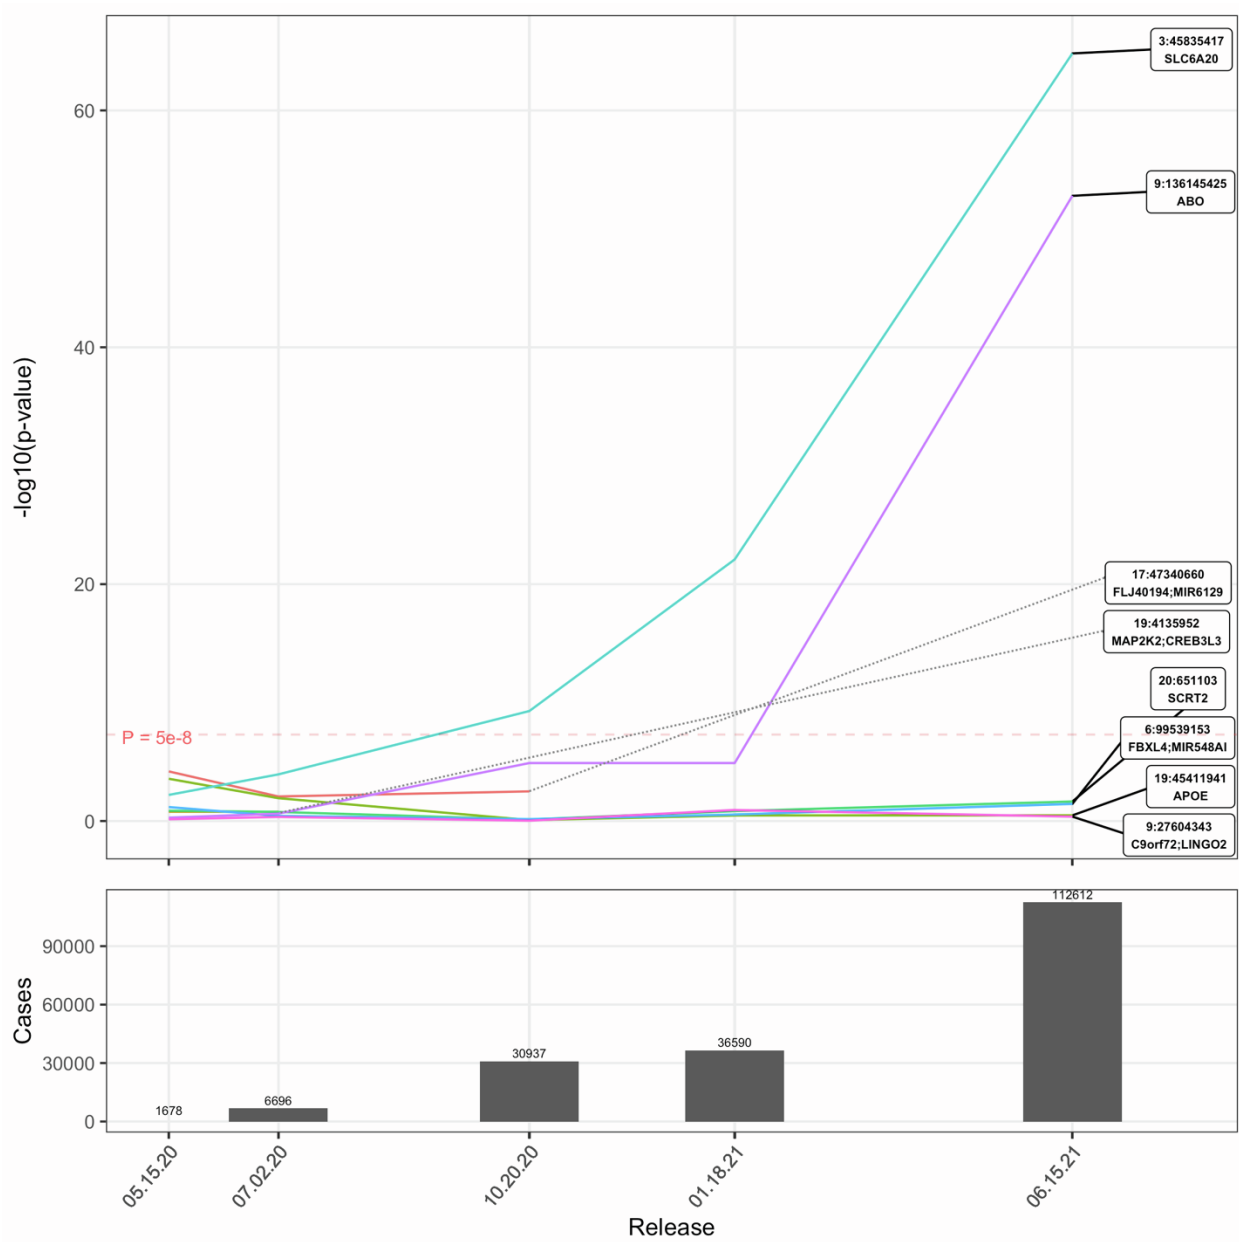

This figure represents the 8 signals from Figure 1 across the 5 C2 freezes from Covid-19hgi. 2 signals (19:4135952 and 17:47340660) were only available in the first 2 and first 3 freezes, respectively. The ABO signal was absent in freeze 5 (released on 01.18.21).
